# Supplementary material for: Phosphine-catalyzed Rauhut–Currier reaction of γ-alkyl allenoate and subsequent trapping using the Diels–Alder reaction
Source: Royal Society of Chemistry journal article supplement (doi:10.1039/d3cc03151a), 2023-01-01

Phosphine catalyzed Rauhut–Currier reaction of  $\gamma$ -alkyl allenoate and trapped by  
Diels-Alder reaction

Juan Zhang<sup>a</sup>, Wei Hao<sup>a</sup>, Ying Chen<sup>a</sup>, Zhen Wang<sup>\*,b</sup>, Jinzhong Yao<sup>c</sup> and Weijun Yao<sup>\*,a</sup>

<sup>a</sup> School of Chemistry and Chemical Engineering, Zhejiang Sci-Tech University, Hangzhou, 310018, P. R. of China;

<sup>b</sup> School of Pharmaceutical Sciences and Chongqing Key Laboratory of Natural Drug Research, Chongqing University, Chongqing 401331, P.R. China.

<sup>c</sup> College of Biological, Chemical Sciences and Engineering, Jiaying University, Jiaying, Zhejiang 314001 (P. R. China)

\* Orgywj@zstu.edu.cn; wangz1114@cqu.edu.cn.

Table of contents

|                                                              |    |
|--------------------------------------------------------------|----|
| A. General information                                       | 2  |
| B. Preparation and analytical data of allenoate <b>1</b>     | 2  |
| C. Synthesis and analytical data of the RC-adduct <b>2</b>   | 3  |
| D. Optimization of the reaction conditions                   | 3  |
| E. General procedure for the one pot two steps reaction      | 6  |
| F. Analytical data of products <b>4</b>                      | 6  |
| G. Gram-Scale Synthesis of <b>4aa</b>                        | 17 |
| H. Transformations of <b>4aa</b>                             | 17 |
| I. Diels-Alder reaction of the allenoate RC-adduct with DMAD | 20 |
| J. X-Ray crystallographic analysis of <b>4Ib</b>             | 22 |
| K. References                                                | 23 |
| L. NMR Spectra                                               | 24 |

## A. General information

Unless otherwise specified, all reactions were carried out with dry solvents in anhydrous conditions. Solvents were dried by activated molecular sieve (3 Å). All chemicals were used without further purification as commercially available unless otherwise noted. Thin-layer chromatography (TLC) was performed on silica gel plates (60F–254) using UV-light (254 and 365 nm). Flash chromatography was conducted on silica gel (300 – 400 mesh). <sup>1</sup>H NMR and <sup>13</sup>C NMR spectra were recorded on a Bruker AV400 MHz spectrometer. Chemical shifts were reported in parts per million (ppm). High resolution mass spectra (HRMS) were recorded on a Waters TOFMS GCT Premier using ESI ionization. Petroleum ether (PE) refers to the fraction with boiling point in the range 60 – 90 °C. Phosphine catalysts<sup>[1]</sup> and alkyl allenolate<sup>[2]</sup> was prepared by our laboratory and Maleimide<sup>[3]</sup> were prepared according to literature methods.

## B. Preparation and analytical data of allenolate 1

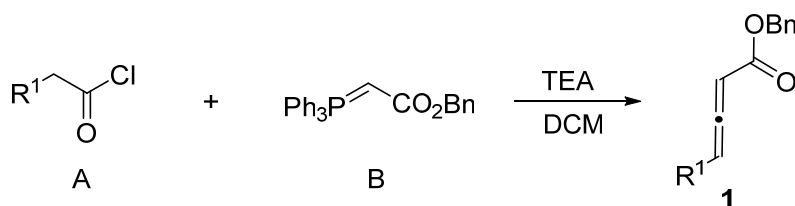

Under nitrogen atmosphere, to a solution of Wittig reagent **B** (5.25 mmol, 1.05 equiv.) and TEA (5 mmol, 1.0 equiv.) in DCM (15.0 mL) was added acyl chloride **A** (5.0 mmol, 1.0 equiv.) at 0 °C, and the resulting mixture was stirred at room temperature for 12 h. The mixture was concentrated and the residue was purified by flash column chromatography on silica gel (petroleum ether / ethyl acetate = 40 / 1) to afford the desired product **1**. The <sup>1</sup>H NMR spectra of known compounds were consistent with the literature reported. The analytical data of new compounds (**1i**, **1k**) were as follow.

### *Benzyl benzyl 4-cyclopropylbuta-2,3-dienoate (1i)*

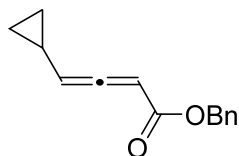

773.3 mg, yield, 72%, Colorless liquid; <sup>1</sup>H NMR (400 MHz, CDCl<sub>3</sub>) δ 7.38 – 7.36 (m, 4H), 7.35 – 7.32 (m, 1H), 5.72 (d, *J* = 6.1 Hz, 1H), 5.53 (dd, *J* = 7.3, 6.5 Hz, 1H), 5.21 (d, *J* = 12.5 Hz, 1H), 5.18 (d, *J* = 12.5 Hz, 1H), 1.43 – 1.30 (m, 1H), 0.85 – 0.77 (m, 2H), 0.51 – 0.44 (m, 2H); <sup>13</sup>C NMR (101 MHz, CDCl<sub>3</sub>) δ 212.9, 165.6, 136.0, 128.4, 128.0, 127.9, 100.1, 89.4, 66.3, 8.3, 7.2, 6.9; IR (KBr): 3032, 3006, 1958, 1720, 1631, 1258, 1150, 736, 697 (cm<sup>-1</sup>); HRMS (ESI-TOF): *m/z* calcd for C<sub>14</sub>H<sub>14</sub>O<sub>2</sub> [M+H]<sup>+</sup> = 215.1067, found = 215.1070.

### Benzyl 7-phenylhepta-2,3-dienoate (**1k**)

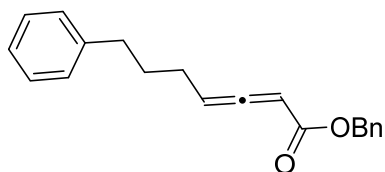

1.03 g, yield, 71%; colorless liquid; It was an inseparable mixture with alkynoate. The ratio (allenoate : alkynoate:) was 1.62:1 from crude  $^1\text{H NMR}$ .  $^1\text{H NMR}$  (400 MHz,  $\text{CDCl}_3$ )  $\delta$  7.41 – 7.25 (m, 7H), 7.23 – 7.13 (m, 3H), 5.66 (t,  $J = 5.50$  Hz, 1.15 H, allenoate), 5.19 (d,  $J = 3.34$  Hz, 2H), 3.34 – 3.33 (m, 1H, alkynoate), 2.76 – 2.64 (m, 2H), 2.28 – 2.13 (m, 2H), 1.89 – 1.74 (m, 2H);  $^{13}\text{C NMR}$  (101 MHz,  $\text{CDCl}_3$ )  $\delta$  212.7 (allenoate), 168.7 (alkynoate), 166.0 (alkynoate), 141.8 (allenoate), 141.6 (alkynoate), 136.0 (allenoate), 135.5 (alkynoate), 128.5 – 128.1 (m, mixture), 125.8, 95.2 (allenoate), 88.3 (allenoate), 83.5 (alkynoate), 71.8 (alkynoate), 67.1 (alkynoate), 66.4 (allenoate), 35.0 (allenoate), 34.7 (alkynoate), 30.2 (allenoate), 30.2 (alkynoate), 26.8 (allenoate), 26.1 (alkynoate), 18.2 (alkynoate); **IR** (KBr): 2937, 2859, 1959, 1720, 1631, 1455, 1363, 1150, 744, 698 ( $\text{cm}^{-1}$ ); **HRMS** (ESI-TOF):  $m/z$  calcd for  $\text{C}_{20}\text{H}_{20}\text{O}_2$  [ $\text{M}+\text{H}$ ] $^+$  = 293.1536, found = 293.1540.

### C. Synthesis and analytical data of the RC-adduct **2**

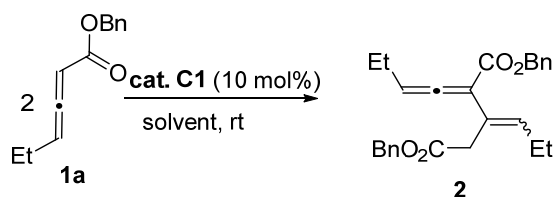

To a dried seal tube with a magnetic stirring bar were added **1a** (0.4 mmol, 1.0 equiv.), toluene (10 mL) and catalyst **C1** (0.04 mmol, 0.1 equiv.) at room temperature. The tube was sealed and was stirred for 4 h until the consumption of **1a**. The reaction mixture was purified directly by flash column chromatography (PE / ethyl acetate = 10 / 1) to obtain compound **2** (40.5 mg, 50% yield) as a colorless liquid, which of the color got darkened slowly. Once **2** was obtained by flash column chromatography, NMR was test immediately.  $^1\text{H NMR}$  (400 MHz,  $\text{CDCl}_3$ )  $\delta$  7.35 – 7.29 (m, 10H), 6.11 (t,  $J = 7.30$  Hz, 1H), 5.61 (t,  $J = 6.40$  Hz, 1H), 5.24 – 5.14 (m, 2H), 5.09 (d,  $J = 2.20$  Hz, 2H), 3.40 – 3.26 (m, 2H), 2.20 – 2.12 (m, 2H), 2.10 – 2.02 (m, 2H), 1.03 – 0.96 (m, 6H);  $^{13}\text{C NMR}$  (101 MHz,  $\text{CDCl}_3$ )  $\delta$  209.9, 170.8, 166.1, 136.3, 136.2, 136.0, 128.4, 128.4, 128.1, 128.1, 127.9, 127.6, 123.7, 98.1, 66.3, 66.2, 35.4, 22.3, 21.5, 13.6, 13.0; **HRMS** (ESI-TOF):  $m/z$  calcd for  $\text{C}_{26}\text{H}_{28}\text{O}_4$  [ $\text{M}+\text{H}$ ] $^+$  = 405.2060, found = 405.2060.

### D. Optimization of the reaction conditions

#### (a) Screening of commercial available catalysts (Table 1)

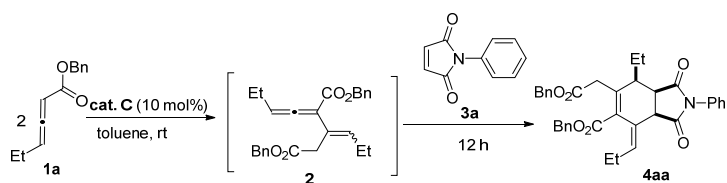

| Entry | Catalyst            | Yield (%) <sup>b</sup> | dr (%) <sup>c</sup> |
|-------|---------------------|------------------------|---------------------|
| 1     | DPPE                | -                      | -                   |
| 2     | DPPP                | -                      | -                   |
| 3     | Me <sub>2</sub> PhP | 13                     | >19:1               |
| 4     | Cy <sub>3</sub> P   | -                      | -                   |
| 5     | Ph <sub>3</sub> P   | -                      | -                   |
| 6     | DMAP                | -                      | -                   |
| 7     | DABCO               | -                      | -                   |

<sup>a</sup> Unless otherwise stated, the reaction was carried out using **1a** (0.2 mmol, 1.0 eq.) and 10 mol% of catalyst in toluene (2 mL) for 4 h at room temperature, followed by the addition of **3a** (0.2 mmol, 1.0 eq.) and stirred for 12 h. <sup>b</sup> Isolated yields. <sup>c</sup> The dr value was determined by crude <sup>1</sup>H NMR.

### (b) Screening of bifunctional phosphine (Table 2)

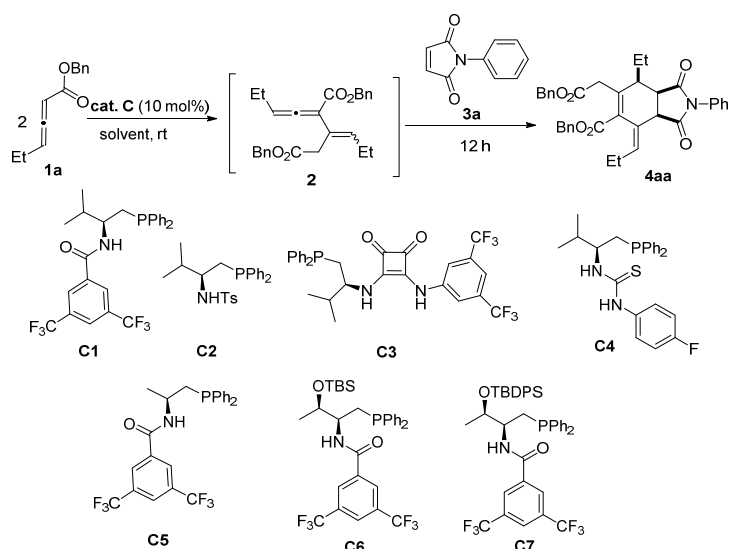

| Entry | Catalyst  | Solvent | Ratio ( <b>1a</b> / <b>3a</b> ) | Yield (%) <sup>b</sup> | dr (%) <sup>c</sup> | ee (%) <sup>d</sup> |
|-------|-----------|---------|---------------------------------|------------------------|---------------------|---------------------|
| 1     | <b>C1</b> | toluene | 1:1                             | 40                     | >19:1               | 0                   |
| 2     | <b>C2</b> | toluene | 1:1                             | 14                     | >19:1               | 0                   |
| 3     | <b>C3</b> | toluene | 1:1                             | 19                     | >19:1               | 0                   |
| 4     | <b>C4</b> | toluene | 1:1                             | 27                     | >19:1               | 0                   |
| 5     | <b>C5</b> | toluene | 1:1                             | 30                     | >19:1               | 0                   |
| 6     | <b>C6</b> | toluene | 1:1                             | 14                     | >19:1               | 0                   |
| 7     | <b>C7</b> | toluene | 1:1                             | 14                     | >19:1               | 0                   |

<sup>a</sup> Unless otherwise stated, the reaction was carried out using **1a** (0.2 mmol, 1.0 equiv.) and 10 mol% of catalyst in toluene (2 mL) for 4 h at room temperature, followed by the addition of **3a** (0.2 mmol, 1.0 equiv.) and stirred for 12 h. <sup>b</sup> Isolated yields. <sup>c</sup> The dr value was determined by crude <sup>1</sup>H NMR. <sup>d</sup> The ee values were determined by HPLC analysis with a chiral stationary phase.

### (c) Screening of reaction solvents (Table 3)

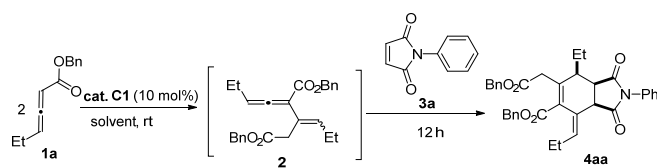

| Entry | Solvent           | Ratio ( <b>1a/3a</b> ) | Yield (%) <sup>b</sup> | dr (%) <sup>c</sup> | ee (%) <sup>d</sup> |
|-------|-------------------|------------------------|------------------------|---------------------|---------------------|
| 1     | toluene           | 1:1                    | 40                     | >19:1               | 0                   |
| 2     | DCM               | 1:1                    | 31                     | >19:1               | 0                   |
| 3     | EA                | 1:1                    | 18                     | >19:1               | 0                   |
| 4     | MeCN              | 1:1                    | 26                     | >19:1               | 0                   |
| 5     | THF               | 1:1                    | 31                     | >19:1               | 0                   |
| 6     | acetone           | 1:1                    | 24                     | >19:1               | 0                   |
| 7     | Et <sub>2</sub> O | 1:1                    | 31                     | >19:1               | 0                   |

<sup>a</sup> Unless otherwise stated, the reaction was carried out using **1a** (0.2 mmol, 1.0 equiv.) and 10 mol% of catalyst **C1** in solvent (2 mL) for 4 h at room temperature, followed by the addition of **3a** (0.2 mmol, 1.0 equiv.) and stirred for 12 h. <sup>b</sup> Isolated yields. <sup>c</sup> The dr value was determined by crude <sup>1</sup>H NMR. <sup>d</sup> The ee values was determined by HPLC analysis with a chiral stationary phase.

### (d) Screening of the ratio of **1a/3a** (Table 4)

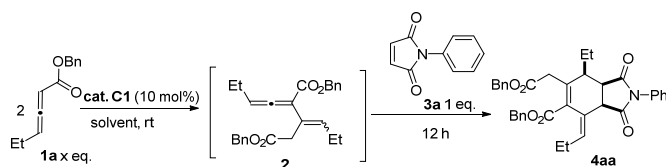

| Entry | Ratio ( <b>1a/3a</b> ) | Yield (%) <sup>b</sup> | dr (%) <sup>c</sup> |
|-------|------------------------|------------------------|---------------------|
| 1     | 1:1                    | 40                     | >19:1               |
| 2     | 1.5/1                  | 43                     | >19:1               |
| 3     | 2:1                    | 47                     | >19:1               |
| 4     | 2.5/1                  | 62                     | >19:1               |
| 5     | 3:1                    | 74                     | >19:1               |
| 6     | 3.5/1                  | 79                     | >19:1               |
| 7     | 4:1                    | 86                     | >19:1               |
| 8     | 4.5/1                  | 94                     | >19:1               |
| 9     | 5:1                    | 100                    | >19:1               |
| 10    | 1:1 <sup>d</sup>       | 24                     | >19:1               |

<sup>a</sup> Unless otherwise stated, the reaction was carried out using **1a** (x eq.) and 10 mol% of **C1** in toluene (2 mL) for 4 h at room temperature, followed by the addition of **3a** (0.2 mmol, 1.0 equiv.) and stirred for 12 h. <sup>b</sup> Isolated yields. <sup>c</sup> The dr value was determined by crude <sup>1</sup>H NMR. <sup>d</sup> **1a** and **3a** was added together.

## E. General procedure for the one pot two steps reaction

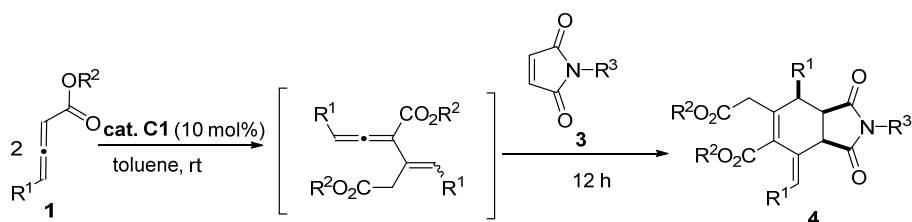

To a dried seal tube with a magnetic stirring bar were added allenolate **1** (1.0 mmol, 5.0 equiv.), toluene (2 mL) and catalyst **C1** (0.02 mmol, 0.1 equiv.) at room temperature. The tube was sealed and the mixture was stirred for 4 h. Then, Maleimide **3** (0.2 mmol, 1.0 equiv.) was added and was stirred for 12 h. After the completely consumption of **3** monitored by TLC, the mixture was purified directly by flash column chromatography (PE / ethyl acetate = 5 / 1) to afford compound **4**.

## F. Analytical data of products 4

*Benzyl (Z)-6-(2-(benzyloxy)-2-oxoethyl)-7-ethyl-1,3-dioxo-2-phenyl-4-propylidene-2,3,3a,4,7,7a-hexahydro-1H-isoindole-5-carboxylate (4aa)*

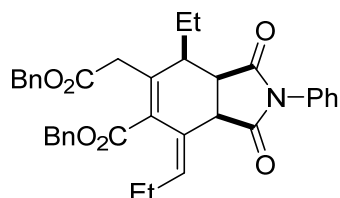

Yield: 116.0 mg, 100%, a pale yellow gel liquid; <sup>1</sup>H NMR (400 MHz, CDCl<sub>3</sub>) δ 7.37 – 7.29 (m, 13H), 7.15 (d, J = 8.14 Hz, 2H), 5.97 (t, J = 7.27 Hz, 1H), 5.23 – 5.09 (m, 2H), 5.08 – 4.98 (m, 2H), 3.89 (d, J = 16.64 Hz, 1H), 3.80 – 3.73 (m, 1H), 3.48 (d, J = 16.78 Hz, 1H), 3.44 (dd, J = 9.14, 5.10 Hz, 1H), 2.51 (q, J = 7.78 Hz, 1H), 2.04 – 1.93 (m, 1H), 1.93 – 1.86 (m, 2H), 1.77 – 1.68 (m, 1H), 1.03 (t, J = 7.27 Hz, 3H), 0.90 (t, J = 7.47 Hz, 3H); <sup>13</sup>C NMR (101 MHz, CDCl<sub>3</sub>) δ 176.1, 175.4, 169.7, 166.5, 146.3, 135.6, 135.4, 135.3, 131.8, 130.5, 128.9, 128.5, 128.4, 128.2, 128.1, 126.5, 125.3, 66.7, 66.6, 48.1, 43.6, 43.4, 36.9, 23.1, 21.1, 13.3, 12.2; IR (KBr): 2964, 2832, 1712, 1597, 1363, 1184, 776, 749, 695 (cm<sup>-1</sup>); HRMS (ESI-TOF): m/z calcd for C<sub>36</sub>H<sub>35</sub>NO<sub>6</sub> [M+H]<sup>+</sup> = 578.2537, found = 578.2540.

*Benzyl (Z)-6-(2-(benzyloxy)-2-oxoethyl)-4-ethylidene-7-methyl-1,3-dioxo-2-phenyl-2,3,3a,4,7,7a-hexahydro-1H-isoindole-5-carboxylate (4ba)*

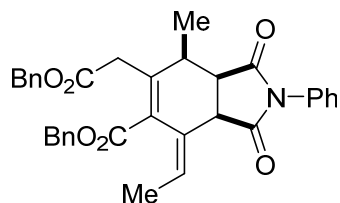

Yield: 83.1 mg, 76%, pale yellow gel liquid; <sup>1</sup>H NMR (400 MHz, CDCl<sub>3</sub>) δ 7.38 – 7.30 (m, 13H), 7.16 (d, J = 6.6 Hz, 2H), 6.09 (q, J = 7.3, 6.8 Hz, 1H), 5.25 – 5.11 (m, 2H), 5.06 (q, J = 12.3 Hz, 2H), 3.85 – 3.77 (m, 2H), 3.56 (d, J = 16.6 Hz, 1H), 3.28 (dd, J = 9.0, 5.2 Hz, 1H), 2.76 (p, J = 7.0 Hz, 1H), 1.54 (d, J = 7.1 Hz, 3H), 1.36 (d, J = 7.3 Hz, 3H); <sup>13</sup>C NMR (101 MHz, CDCl<sub>3</sub>) δ 176.2, 175.4, 169.7, 166.4, 146.7, 135.7, 135.4, 131.8, 130.0, 129.0, 128.5, 128.5, 128.3, 128.2, 128.1, 126.6, 126.5, 66.7, 66.6, 47.9, 46.0, 36.5, 36.3, 15.2, 13.8; IR (KBr): 2948, 2832, 1711, 1597, 1363, 1184, 776, 736, 695 (cm<sup>-1</sup>); HRMS (ESI-TOF): m/z calcd for C<sub>34</sub>H<sub>31</sub>NO<sub>6</sub> [M+H]<sup>+</sup> = 550.2224, found = 550.2228.

***Benzyl (Z)-6-(2-(benzyloxy)-2-oxoethyl)-4-butylidene-1,3-dioxo-2-phenyl-7-propyl-2,3,3a,4,7,7a-hexahydro-1H-isoindole-5-carboxylate (4ca)***

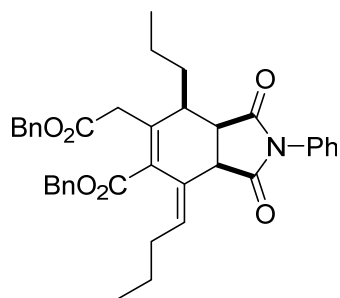

Yield: 111.3 mg, 92%, a pale yellow gel liquid;  $^1\text{H NMR}$  (400 MHz,  $\text{CDCl}_3$ )  $\delta$  7.38 – 7.30 (m, 13H), 7.16 (d,  $J = 6.6$  Hz, 2H), 6.01 (t,  $J = 7.2$  Hz, 1H), 5.21 (d,  $J = 12.4$  Hz, 1H), 5.13 – 5.05 (m, 2H), 5.00 (d,  $J = 12.3$  Hz, 1H), 3.92 (d,  $J = 16.6$  Hz, 1H), 3.77 (d,  $J = 10.2$  Hz, 1H), 3.46 (d,  $J = 16.7$  Hz, 1H), 3.40 (dd,  $J = 9.2, 5.1$  Hz, 1H), 2.61 (q,  $J = 7.6$  Hz, 1H), 1.84 (q,  $J = 7.1$  Hz, 3H), 1.62 (d,  $J = 10.2$  Hz, 2H), 1.55 – 1.46 (m, 1H), 1.33 (d,  $J = 7.5$  Hz, 2H), 0.90 (t,  $J = 7.2$  Hz, 3H), 0.80 (t,  $J = 7.4$  Hz, 3H);  $^{13}\text{C NMR}$  (101 MHz,  $\text{CDCl}_3$ )  $\delta$  176.1, 175.4, 169.7, 166.6, 146.3, 135.7, 135.4, 133.6, 131.8, 130.7, 129.0, 128.5, 128.5, 128.3, 128.2, 128.2, 126.5, 125.8, 66.7, 66.6, 43.9, 41.9, 37.1, 31.7, 30.2, 22.1, 21.0, 14.1, 13.7; **IR** (KBr): 2958, 2930, 2871, 1712, 1597, 1499, 1371, 1180, 776, 749, 695 ( $\text{cm}^{-1}$ ); **HRMS** (ESI-TOF):  $m/z$  calcd for  $\text{C}_{38}\text{H}_{39}\text{NO}_6$   $[\text{M}+\text{H}]^+ = 606.2850$ , found = 606.2848.

***Benzyl (Z)-6-(2-(benzyloxy)-2-oxoethyl)-7-butyl-1,3-dioxo-4-pentylidene-2-phenyl-2,3,3a,4,7,7a-hexahydro-1H-isoindole-5-carboxylate (4da)***

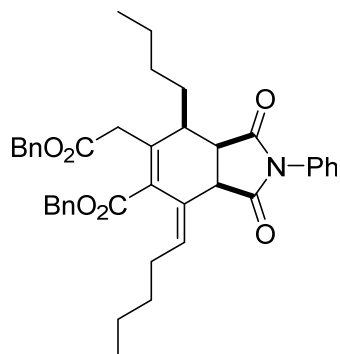

Yield: 112.4 mg, 88%, a pale yellow gel liquid;  $^1\text{H NMR}$  (400 MHz,  $\text{CDCl}_3$ )  $\delta$  7.38 – 7.30 (m, 13H), 7.16 (d,  $J = 6.7$  Hz, 2H), 6.01 (t,  $J = 7.2$  Hz, 1H), 5.23 – 5.09 (m, 2H), 5.09 – 4.98 (m, 2H), 3.93 (d,  $J = 16.6$  Hz, 1H), 3.77 (d,  $J = 9.2$  Hz, 1H), 3.46 (d,  $J = 16.6$  Hz, 1H), 3.41 (dd,  $J = 9.2, 5.1$  Hz, 1H), 2.59 (q,  $J = 7.6$  Hz, 1H), 1.87 (q,  $J = 7.2$  Hz, 3H), 1.65 (dd,  $J = 12.3, 6.5$  Hz, 1H), 1.51 – 1.43 (m, 1H), 1.32 – 1.25 (m, 5H), 1.22 – 1.17 (m, 2H), 0.88 (t,  $J = 7.1$  Hz, 3H), 0.81 (t,  $J = 7.2$  Hz, 3H);  $^{13}\text{C NMR}$  (101 MHz,  $\text{CDCl}_3$ )  $\delta$  176.1, 175.4, 169.7, 166.6, 146.4, 135.7, 135.4, 133.7, 131.8, 130.7, 129.0, 128.5, 128.5, 128.3, 128.2, 128.2, 126.5, 125.6, 66.7, 66.6, 43.9, 42.1, 31.0, 29.9, 29.4, 27.8, 22.7, 22.3, 13.9, 13.8; **IR** (KBr): 2956, 2858, 1712, 1597, 1499, 1455, 1371, 1179, 734, 695 ( $\text{cm}^{-1}$ ); **HRMS** (ESI-TOF):  $m/z$  calcd for  $\text{C}_{40}\text{H}_{43}\text{NO}_6$   $[\text{M}+\text{H}]^+ = 634.3163$ , found = 634.3170.

**Benzyl (Z)-6-(2-(benzyloxy)-2-oxoethyl)-4-hexylidene-1,3-dioxo-7-pentyl-2-phenyl-2,3,3a,4,7,7a-hexahydro-1H-isoindole-5-carboxylatebenzyl (4ea)**

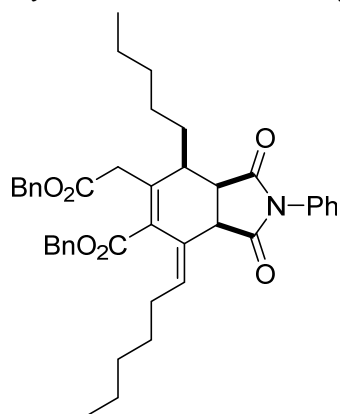

Yield: 114.7 mg, 86%, a pale yellow gel liquid;  $^1\text{H NMR}$  (400 MHz,  $\text{CDCl}_3$ )  $\delta$  7.37 – 7.30 (m, 13H), 7.17 (d,  $J = 6.7$  Hz, 2H), 6.01 (t,  $J = 7.2$  Hz, 1H), 5.23 – 5.09 (m, 2H), 5.08 – 4.98 (m, 2H), 3.92 (d,  $J = 16.6$  Hz, 1H), 3.77 (d,  $J = 9.2$  Hz, 1H), 3.47 (d,  $J = 16.7$  Hz, 1H), 3.41 (dd,  $J = 9.1, 5.1$  Hz, 1H), 2.59 (q,  $J = 7.5$  Hz, 1H), 1.89 – 1.81 (m, 3H), 1.64 (d,  $J = 10.6$  Hz, 1H), 1.48 (d,  $J = 8.8$  Hz, 1H), 1.31 – 1.24 (m, 8H), 1.20 – 1.14 (m, 3H), 0.87 – 0.83 (m, 6H);  $^{13}\text{C NMR}$  (101 MHz,  $\text{CDCl}_3$ )  $\delta$  176.1, 175.4, 169.7, 166.6, 146.4, 135.7, 135.4, 133.8, 131.8, 130.7, 129.0, 128.5, 128.5, 128.3, 128.2, 128.2, 126.5, 125.6, 66.7, 66.6, 43.9, 42.1, 31.8, 31.4, 29.7, 28.5, 28.0, 27.5, 22.4, 22.4, 13.9; **IR** (KBr): 2929, 2857, 1712, 1598, 1499, 1455, 1377, 1177, 749, 695 ( $\text{cm}^{-1}$ ); **HRMS** (ESI-TOF):  $m/z$  calcd for  $\text{C}_{42}\text{H}_{47}\text{NO}_6$   $[\text{M}+\text{H}]^+$  = 662.3476, found = 662.3477.

**Benzyl (Z)-6-(2-(benzyloxy)-2-oxoethyl)-4-heptylidene-7-hexyl-1,3-dioxo-2-phenyl-2,3,3a,4,7,7a-hexahydro-1H-isoindole-5-carboxylate (4fa)**

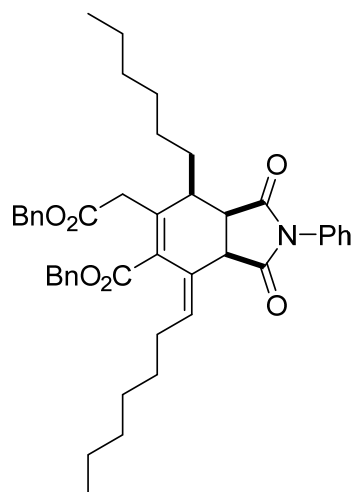

Yield: 135.2 mg, 98%, a pale yellow gel liquid;  $^1\text{H NMR}$  (400 MHz,  $\text{CDCl}_3$ )  $\delta$  7.37 – 7.30 (m, 13H), 7.17 (d,  $J = 6.7$  Hz, 2H), 6.02 (t,  $J = 7.0$  Hz, 1H), 5.23 – 5.10 (m, 2H), 5.09 – 4.98 (m, 2H), 3.98 – 3.88 (m, 1H), 3.77 (d,  $J = 9.2$  Hz, 1H), 3.49 (d,  $J = 16.6$  Hz, 1H), 3.42 (dd,  $J = 9.1, 5.1$  Hz, 1H), 2.60 (q,  $J = 7.2$  Hz, 1H), 1.87 (q,  $J = 7.4$  Hz, 3H), 1.67 (d,  $J = 8.3$  Hz, 1H), 1.51 – 1.43 (m, 1H), 1.27 (d,  $J = 4.6$  Hz, 10H), 1.10 – 1.19 (m, 5H), 0.89 – 0.85 (m, 6H);  $^{13}\text{C NMR}$  (101 MHz,  $\text{CDCl}_3$ )  $\delta$  176.1, 175.4, 169.7, 166.6, 146.4, 135.7, 135.4, 133.7, 131.8, 130.7, 128.9, 128.5, 128.4, 128.3, 128.2, 128.1, 126.5, 125.6, 66.7, 66.5, 43.9, 42.1, 31.6, 31.5, 29.8, 29.3, 28.9, 28.8, 28.1, 27.8, 22.5, 14.0, 14.0; **IR** (KBr): 2927, 2855, 1712, 1598, 1499, 1455, 1375, 1253, 1184, 735, 695 ( $\text{cm}^{-1}$ ); **HRMS** (ESI-TOF):  $m/z$  calcd for  $\text{C}_{44}\text{H}_{51}\text{NO}_6$   $[\text{M}+\text{H}]^+$  = 690.3789, found = 690.3785.



***Benzyl (Z)-6-(2-(benzyloxy)-2-oxoethyl)-7-isopropyl-4-(2-methylpropylidene)-1,3-dioxo-2-phenyl-2,3,3a,4,7,7a-hexahydro-1H-isoindole-5-carboxylate (4ga)***

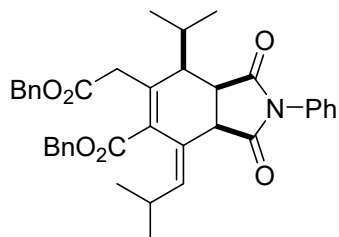

Yield: 83.2 mg, 69%, a pale yellow gel liquid;  $^1\text{H NMR}$  (400 MHz,  $\text{CDCl}_3$ )  $\delta$  7.32 – 7.26 (m, 11H), 7.24 – 7.22 (m, 2H), 7.17 (d,  $J = 8.0$  Hz, 2H), 5.77 – 5.65 (m, 1H), 5.16 (d,  $J = 12.6$  Hz, 1H), 5.04 (d,  $J = 12.6$  Hz, 1H), 4.90 – 4.79 (m, 2H), 3.80 (dd,  $J = 12.0, 6.7$  Hz, 1H), 3.70 (d,  $J = 9.2$  Hz, 1H), 3.55 (dd,  $J = 8.9, 4.3$  Hz, 2H), 2.39 (s, 1H), 2.25 – 2.23 (m, 6.6 Hz, 1H), 2.04 (s, 1H), 1.15 (d,  $J = 6.4$  Hz, 3H), 0.94 (d,  $J = 6.4$  Hz, 3H), 0.89 – 0.85 (m, 6H);  $^{13}\text{C NMR}$  (101 MHz,  $\text{CDCl}_3$ )  $\delta$  176.2, 175.2, 169.5, 166.8, 145.2, 135.8, 135.4, 132.0, 131.8, 128.7, 128.5, 128.4, 128.3, 128.3, 128.2, 128.1, 128.0, 128.0, 126.7, 126.4, 124.7, 66.7, 66.4, 49.4, 43.8, 29.7, 26.9, 26.3, 23.3, 22.8, 21.9, 21.7; **IR** (KBr): 2958, 2869, 1712, 1597, 1499, 1366, 1153, 749, 695 ( $\text{cm}^{-1}$ ); **HRMS** (ESI-TOF):  $m/z$  calcd for  $\text{C}_{38}\text{H}_{39}\text{NO}_6$   $[\text{M}+\text{H}]^+ = 606.2850$ , found = 606.2854.

***Benzyl (Z)-6-(2-(benzyloxy)-2-oxoethyl)-7-isobutyl-4-(3-methylbutylidene)-1,3-dioxo-2-phenyl-2,3,3a,4,7,7a-hexahydro-1H-isoindole-5-carboxylate (4ha)***

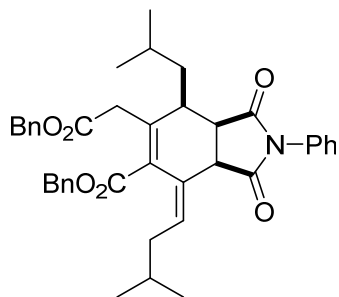

Yield: 92.1 mg, 73%, a pale yellow gel liquid;  $^1\text{H NMR}$  (400 MHz,  $\text{CDCl}_3$ )  $\delta$  7.38 – 7.30 (m, 13H), 7.16 (d,  $J = 6.6$  Hz, 2H), 6.05 (t,  $J = 7.2$  Hz, 1H), 5.21 (d,  $J = 12.4$  Hz, 1H), 5.11 (d,  $J = 10.6$  Hz, 1H), 5.08 (d,  $J = 10.5$  Hz, 1H), 4.99 (d,  $J = 12.3$  Hz, 1H), 3.88 (d,  $J = 16.6$  Hz, 1H), 3.78 (d,  $J = 9.9$  Hz, 1H), 3.49 (d,  $J = 16.7$  Hz, 1H), 3.37 (dd,  $J = 9.1, 5.1$  Hz, 1H), 2.73 – 2.63 (m, 1H), 1.74 (t,  $J = 7.2$  Hz, 3H), 1.64 – 1.58 (m, 2H), 1.54 – 1.47 (m, 1H), 0.94 (d,  $J = 6.4$  Hz, 3H), 0.84 (d,  $J = 6.4$  Hz, 3H), 0.80 (dd,  $J = 6.6, 3.6$  Hz, 6H);  $^{13}\text{C NMR}$  (101 MHz,  $\text{CDCl}_3$ )  $\delta$  176.1, 175.5, 169.7, 166.6, 151.2, 146.3, 135.8, 135.5, 132.9, 131.9, 131.0, 129.1, 128.6, 128.5, 128.5, 128.3, 128.3, 126.6, 126.5, 119.7, 66.8, 66.7, 44.1, 39.7, 38.8, 37.1, 36.9, 28.3, 25.6, 22.8, 22.5, 22.3, 22.2; **IR** (KBr): 2955, 2832, 1712, 1592, 1363, 776 ( $\text{cm}^{-1}$ ); **HRMS** (ESI-TOF):  $m/z$  calcd for  $\text{C}_{40}\text{H}_{43}\text{NO}_6$   $[\text{M}+\text{H}]^+ = 634.3163$ , found = 634.3162.

### Benzyl

*(Z)*-6-(2-(benzyloxy)-2-oxoethyl)-7-cyclopropyl-4-(cyclopropylmethylene)-1,3-dioxo-2-phenyl-2,3,3a,4,7,7a-hexahydro-1H-isoindole-5-carboxylate (*4ia*)

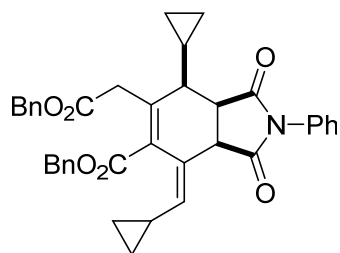

Yield: 121.2 mg, 100%, a pale yellow gel liquid;  $^1\text{H NMR}$  (400 MHz,  $\text{CDCl}_3$ )  $\delta$  7.35 – 7.27 (m, 13H), 7.17 – 7.13 (m, 2H), 5.35 (d,  $J = 10.0$  Hz, 1H), 5.23 – 5.11 (m, 2H), 5.08 – 4.95 (m, 2H), 3.94 (d,  $J = 16.3$  Hz, 1H), 3.80 – 3.71 (m, 2H), 3.45 (dd,  $J = 8.8, 4.6$  Hz, 1H), 1.68 (dd,  $J = 10.9, 4.6$  Hz, 1H), 1.53 (d,  $J = 5.4$  Hz, 1H), 1.27 – 1.15 (m, 1H), 0.74 – 0.55 (m, 4H), 0.42 (d,  $J = 4.7$  Hz, 2H), 0.22 (d,  $J = 15.2$  Hz, 2H);  $^{13}\text{C NMR}$  (101 MHz,  $\text{CDCl}_3$ )  $\delta$  176.3, 175.5, 169.8, 166.9, 145.2, 138.4, 135.8, 135.5, 131.9, 130.2, 128.9, 128.4, 128.3, 128.1, 128.1, 128.1, 126.5, 124.2, 66.6, 66.6, 48.4, 47.6, 46.0, 36.6, 12.0, 10.1, 8.0, 7.4, 6.0, 4.3; **IR** (KBr): 3004, 2952, 1716, 1498, 1374, 1188, 751, 695( $\text{cm}^{-1}$ ); **HRMS** (ESI-TOF):  $m/z$  calcd for  $\text{C}_{38}\text{H}_{35}\text{NO}_6$   $[\text{M}+\text{H}]^+ = 602.2537$ , found = 602.2540.

### Benzyl

*(Z)*-6-(2-(benzyloxy)-2-oxoethyl)-1,3-dioxo-7-phenethyl-2-phenyl-4-(3-phenylpropylidene)-2,3,3a,4,7,7a-hexahydro-1H-isoindole-5-carboxylate (*4ja*)

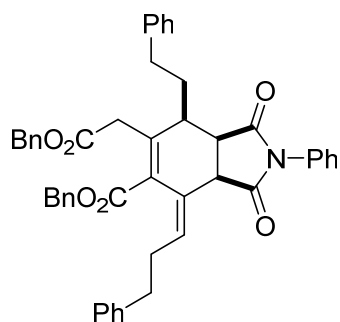

Yield: 98.3 mg, 72%, a pale yellow gel liquid;  $^1\text{H NMR}$  (400 MHz,  $\text{CDCl}_3$ )  $\delta$  7.35 (d,  $J = 7.7$  Hz, 2H), 7.30 – 7.22 (m, 15H), 7.21 (s, 1H), 7.15 – 7.13 (m, 5H), 7.05 (d,  $J = 7.2$  Hz, 2H), 5.92 (t,  $J = 7.2$  Hz, 1H), 5.19 (d,  $J = 12.4$  Hz, 1H), 5.09 (d,  $J = 12.4$  Hz, 1H), 5.01 (d,  $J = 12.3$  Hz, 1H), 4.94 (d,  $J = 12.3$  Hz, 1H), 3.77 – 3.69 (m, 2H), 3.53 (d,  $J = 16.6$  Hz, 1H), 3.43 (dd,  $J = 9.0, 5.1$  Hz, 1H), 2.82 (t,  $J = 11.9$  Hz, 1H), 2.64 – 2.51 (m, 3H), 2.45 – 2.37 (m, 1H), 2.32 – 2.24 (m, 1H), 2.23 – 2.17 (m, 2H), 1.95 – 1.87 (m, 1H);  $^{13}\text{C NMR}$  (101 MHz,  $\text{CDCl}_3$ )  $\delta$  175.9, 175.1, 169.6, 166.2, 146.6, 141.0, 141.0, 135.6, 135.4, 132.9, 131.8, 130.6, 129.0, 128.5, 128.5, 128.4, 128.3, 128.2, 128.2, 126.8, 126.6, 126.1, 125.9, 66.8, 66.6, 43.2, 41.3, 36.2, 34.8, 33.8, 31.1, 29.8; **IR** (KBr): 3062, 3028, 2935, 2833, 1712, 1598, 1498, 1365, 1184, 776, 738, 698 ( $\text{cm}^{-1}$ ); **HRMS** (ESI-TOF):  $m/z$  calcd for  $\text{C}_{48}\text{H}_{43}\text{NO}_6$   $[\text{M}+\text{H}]^+ = 730.3163$ , found = 730.3165.

***Benzyl (Z)-6-(2-(benzyloxy)-2-oxoethyl)-1,3-dioxo-2-phenyl-4-(4-phenylbutylidene)-7-(3-phenylpropyl)-2,3,3a,4,7,7a-hexahydro-1H-isoindole-5-carboxylate (4ka)***

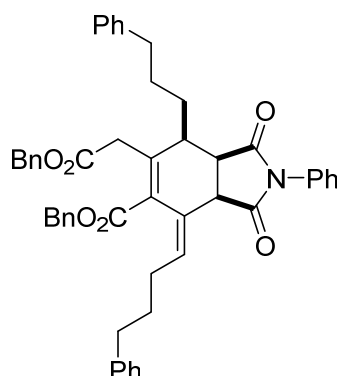

Yield: 155.7 mg, 95%, a pale yellow gel liquid;  $^1\text{H NMR}$  (400 MHz,  $\text{CDCl}_3$ )  $\delta$  7.38 – 7.27 (m, 13H), 7.23 – 7.21 (m, 4H), 7.17 – 7.08 (m, 8H), 6.00 (t,  $J = 7.0$  Hz, 1H), 5.14 (d,  $J = 12.4$  Hz, 1H), 5.06 – 5.01 (m, 2H), 4.97 (d,  $J = 12.2$  Hz, 1H), 3.88 (d,  $J = 16.6$  Hz, 1H), 3.72 (d,  $J = 9.2$  Hz, 1H), 3.46 (d,  $J = 16.7$  Hz, 1H), 3.38 (dd,  $J = 9.2, 5.1$  Hz, 1H), 2.57 (dd,  $J = 12.2, 7.0$  Hz, 2H), 2.50 – 2.46 (m, 2H), 1.91 – 1.86 (m, 2H), 1.84 – 1.75 (m, 1H), 1.74 – 1.66 (m, 1H), 1.63 – 1.57 (m, 4H);  $^{13}\text{C NMR}$  (101 MHz,  $\text{CDCl}_3$ )  $\delta$  176.0, 175.3, 169.6, 166.4, 146.1, 141.9, 141.6, 135.6, 135.3, 133.4, 131.8, 130.7, 129.0, 128.5, 128.5, 128.3, 128.3, 128.2, 126.5, 126.0, 125.9, 125.8, 66.8, 66.6, 47.8, 43.8, 42.0, 35.9, 35.5, 30.5, 29.6, 29.4, 27.8; **IR** (KBr): 2935, 2857, 1716, 1631, 1497, 1372, 1181, 749, 697( $\text{cm}^{-1}$ ); **HRMS** (ESI-TOF):  $m/z$  calcd for  $\text{C}_{50}\text{H}_{47}\text{NO}_6$   $[\text{M}+\text{H}]^+ = 758.3476$ , found = 758.3486.

***Benzyl (Z)-6-(2-(benzyloxy)-2-oxoethyl)-2-(4-bromophenyl)-7-ethyl-1,3-dioxo-4-propylidene-2,3,3a,4,7,7a-hexahydro-1H-isoindole-5-carboxylate (4ab)***

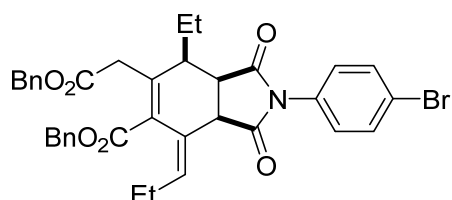

Yield: 130.9 mg, 100%, a pale yellow gel liquid;  $^1\text{H NMR}$  (400 MHz,  $\text{CDCl}_3$ )  $\delta$  7.46 (d,  $J = 8.7$  Hz, 2H), 7.35 – 7.28 (m, 10H), 7.04 (d,  $J = 8.7$  Hz, 2H), 5.91 (t,  $J = 7.3$  Hz, 1H), 5.15 (d,  $J = 12.5$  Hz, 2H), 5.06 – 4.96 (m, 2H), 3.84 – 3.72 (m, 2H), 3.57 (d,  $J = 16.7$  Hz, 1H), 3.44 (dd,  $J = 9.0, 4.9$  Hz, 1H), 2.46 (q,  $J = 7.8$  Hz, 1H), 1.97 (dd,  $J = 13.5, 6.0$  Hz, 1H), 1.90 (q,  $J = 7.4$  Hz, 2H), 1.78 – 1.71 (m, 1H), 1.03 (t,  $J = 7.3$  Hz, 3H), 0.91 (t,  $J = 7.5$  Hz, 3H);  $^{13}\text{C NMR}$  (101 MHz,  $\text{CDCl}_3$ )  $\delta$  175.8, 175.0, 169.7, 166.5, 146.0, 135.7, 135.6, 135.3, 132.1, 130.8, 130.5, 128.5, 128.5, 128.2, 128.2, 128.1, 125.3, 122.2, 66.8, 66.6, 48.5, 43.4, 36.4, 26.9, 23.1, 21.0, 13.3, 12.3; **IR** (KBr): 2965, 2875, 1712, 1600, 1489, 1370, 1070, 823, 735, 697 ( $\text{cm}^{-1}$ ); **HRMS** (ESI-TOF):  $m/z$  calcd for  $\text{C}_{36}\text{H}_{34}\text{BrNO}_6$   $[\text{M}+\text{H}]^+ = 656.1642$ , found = 656.1641, 658.1627.

### Benzyl Benzyl

#### (Z)-6-(2-(benzyloxy)-2-oxoethyl)-2-(3,5-dichlorophenyl)-7-ethyl-1,3-dioxo-4-propylidene-2,3,3a,4,7,7a-hexahydro-1H-isoindole-5-carboxylate (4ac)

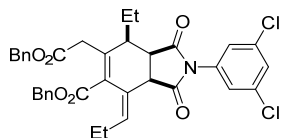

Yield: 128.2 mg, 99%, a pale yellow gel liquid;  $^1\text{H NMR}$  (400 MHz,  $\text{CDCl}_3$ )  $\delta$  7.36 – 7.28 (m, 11H), 7.24 (d,  $J = 1.8$  Hz, 2H), 5.89 (t,  $J = 6.9$  Hz, 1H), 5.17 – 5.09 (m, 2H), 5.06 – 4.98 (m, 2H), 3.81 – 3.70 (m, 2H), 3.64 (d,  $J = 16.8$  Hz, 1H), 3.45 (dd,  $J = 9.2, 5.2$  Hz, 1H), 2.49 – 2.40 (m, 1H), 1.94 (dd,  $J = 13.7, 6.3$  Hz, 1H), 1.87 (q,  $J = 7.5$  Hz, 2H), 1.79 – 1.92 (m, 1H), 1.04 (t,  $J = 7.3$  Hz, 3H), 0.89 (t,  $J = 7.5$  Hz, 3H);  $^{13}\text{C NMR}$  (101 MHz,  $\text{CDCl}_3$ )  $\delta$  175.3, 174.6, 169.7, 166.4, 145.8, 136.0, 135.6, 135.3, 135.0, 133.6, 130.8, 128.6, 128.5, 128.5, 128.3, 128.3, 128.1, 128.0, 125.3, 125.2, 66.9, 66.6, 48.6, 43.4, 36.1, 29.7, 23.1, 21.1, 13.3, 12.3; **IR** (KBr): 2961, 2832, 1720, 1588, 1362, 1182, 777 ( $\text{cm}^{-1}$ ); **HRMS** (ESI-TOF):  $m/z$  calcd for  $\text{C}_{36}\text{H}_{33}\text{Cl}_2\text{NO}_6$   $[\text{M}+\text{H}]^+ = 646.1758, 648.1729$ , found = 646.1761, 648.1743.

#### Benzyl (Z)-6-(2-(benzyloxy)-2-oxoethyl)-7-ethyl-2-(4-ethylphenyl)-1,3-dioxo-4-propylidene-2,3,3a,4,7,7a-hexahydro-1H-isoindole-5-carboxylate (4ad)

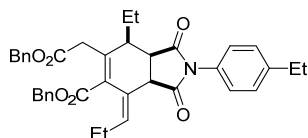

Yield: 110.3 mg, 91%, a pale yellow gel liquid;  $^1\text{H NMR}$  (400 MHz,  $\text{CDCl}_3$ )  $\delta$  7.35 – 7.29 (m, 10H), 7.19 (d,  $J = 8.3$  Hz, 2H), 7.06 (d,  $J = 8.3$  Hz, 2H), 5.97 (t,  $J = 7.3$  Hz, 1H), 5.23 – 5.10 (m, 2H), 5.09 – 4.98 (m, 2H), 3.92 (d,  $J = 16.6$  Hz, 1H), 3.75 (d,  $J = 10.0$  Hz, 1H), 3.50 – 3.36 (m, 2H), 2.65 (q,  $J = 7.6$  Hz, 2H), 2.51 (q,  $J = 7.8$  Hz, 1H), 1.97 – 1.86 (m, 3H), 1.75 – 1.68 (m, 1H), 1.22 (t,  $J = 7.6$  Hz, 3H), 1.02 (t,  $J = 7.4$  Hz, 3H), 0.89 (t,  $J = 7.5$  Hz, 3H);  $^{13}\text{C NMR}$  (101 MHz,  $\text{CDCl}_3$ )  $\delta$  176.3, 175.5, 169.8, 166.6, 146.4, 144.7, 135.7, 135.4, 135.1, 130.5, 129.3, 128.5, 128.5, 128.2, 128.1, 126.3, 125.3, 66.7, 66.6, 43.6, 37.1, 29.7, 28.5, 23.1, 21.1, 15.3, 13.4, 12.3; **IR** (KBr): 2963, 2832, 1710, 1589, 1514, 1363, 776 ( $\text{cm}^{-1}$ ); **HRMS** (ESI-TOF):  $m/z$  calcd for  $\text{C}_{38}\text{H}_{39}\text{NO}_6$   $[\text{M}+\text{H}]^+ = 606.2850$ , found = 606.2856.

#### Benzyl (Z)-2-benzyl-6-(2-(benzyloxy)-2-oxoethyl)-7-ethyl-1,3-dioxo-4-propylidene-2,3,3a,4,7,7a-hexahydro-1H-isoindole-5-carboxylate (4ae)

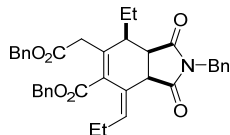

Yield: 119.8 mg, 100%, a pale yellow gel liquid;  $^1\text{H NMR}$  (400 MHz,  $\text{CDCl}_3$ )  $\delta$  7.34 – 7.29 (m, 11H), 7.26 – 7.22 (m, 2H), 7.20 – 7.19 (m, 3H), 5.83 (t,  $J = 7.3$  Hz, 1H), 5.12 – 5.03 (m, 4H), 4.60 – 4.50 (m, 2H), 3.77 (d,  $J = 16.7$  Hz, 1H), 3.62 – 3.56 (m, 1H), 3.29 – 3.22 (m, 2H), 2.37 (q,  $J = 7.1$  Hz, 1H), 1.84 – 1.76 (m, 3H), 1.60 – 1.52 (m, 1H), 0.95 (t,  $J = 7.3$  Hz, 3H), 0.82 (t,  $J = 7.5$  Hz, 3H);  $^{13}\text{C NMR}$  (101 MHz,  $\text{CDCl}_3$ )  $\delta$  176.7, 175.9, 169.8, 165.9, 147.0, 135.8, 135.7, 135.5, 135.1, 130.3, 128.5, 128.5, 128.4, 128.4, 128.2, 128.1, 128.0, 128.0, 127.7, 125.6, 66.7, 66.4, 48.4, 43.6, 42.9, 42.3, 36.7, 29.7, 23.1, 20.8, 13.3, 12.1; **IR** (KBr): 2962, 2832, 1702, 1657, 1588, 1362, 1155, 777 ( $\text{cm}^{-1}$ ); **HRMS** (ESI-TOF):  $m/z$  calcd for  $\text{C}_{37}\text{H}_{37}\text{NO}_6$   $[\text{M}+\text{H}]^+ = 592.2694$ , found = 592.2700.

***Benzyl (Z)-6-(2-(benzyloxy)-2-oxoethyl)-7-ethyl-2-(4-methoxyphenyl)-1,3-dioxo-4-propylidene-2,3,3a,4,7,7a-hexahydro-1H-isoindole-5-carboxylate (4af)***

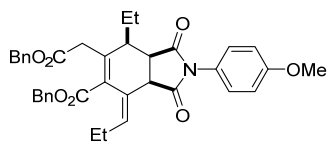

Yield: 117.9 mg, 97%, a pale yellow gel liquid;  $^1\text{H NMR}$  (400 MHz,  $\text{CDCl}_3$ )  $\delta$  7.35 – 7.29 (m, 10H), 7.05 (d,  $J = 8.93$  Hz, 2H), 6.86 (d,  $J = 8.95$  Hz, 2H), 5.95 (t,  $J = 7.28$  Hz, 1H), 5.24 – 5.09 (m, 2H), 5.08 – 4.98 (m, 2H), 3.88 (d,  $J = 16.63$  Hz, 1H), 3.79 (s, 3H), 3.74 (d,  $J = 9.94$  Hz, 1H), 3.48 (d,  $J = 16.65$  Hz, 1H), 3.42 (dd,  $J = 9.07, 5.03$  Hz, 1H), 2.54 – 2.43 (m, 1H), 1.98 – 1.85 (m, 3H), 1.75 – 1.68 (m, 1H), 1.02 (t,  $J = 7.28$  Hz, 3H), 0.89 (t,  $J = 7.47$  Hz, 3H);  $^{13}\text{C NMR}$  (101 MHz,  $\text{CDCl}_3$ )  $\delta$  176.3, 175.6, 169.7, 166.6, 159.3, 146.3, 135.7, 135.4, 135.2, 130.5, 128.5, 128.5, 128.2, 128.2, 128.1, 127.7, 125.4, 124.4, 114.3, 66.7, 66.6, 55.4, 43.5, 36.9, 29.6, 23.1, 21.1, 13.3, 12.3; **IR** (KBr): 2963, 2832, 1710, 1588, 1536, 1363, 1250, 1182, 777 ( $\text{cm}^{-1}$ ); **HRMS** (ESI-TOF):  $m/z$  calcd for  $\text{C}_{37}\text{H}_{37}\text{NO}_7$  [ $\text{M}+\text{H}$ ] $^+$  = 608.2643, found = 608.2646.

***Benzyl (Z)-6-(2-(benzyloxy)-2-oxoethyl)-7-ethyl-1,3-dioxo-4-propylidene-2-(p-tolyl)-2,3,3a,4,7,7a-hexahydro-1H-isoindole-5-carboxylate (4ag)***

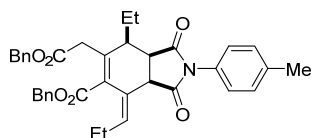

Yield: 104.5 mg, 88%, a pale yellow gel liquid;  $^1\text{H NMR}$  (400 MHz,  $\text{CDCl}_3$ )  $\delta$  7.35 – 7.29 (m, 10H), 7.17 (d,  $J = 8.19$  Hz, 2H), 7.04 (d,  $J = 8.30$  Hz, 2H), 6.01 – 5.94 (m, 1H), 5.21 (d,  $J = 12.47$  Hz, 1H), 5.12 (d,  $J = 12.47$  Hz, 1H), 5.08 (d,  $J = 12.33$  Hz, 1H), 5.01 (d,  $J = 12.33$  Hz, 1H), 3.91 (d,  $J = 16.63$  Hz, 1H), 3.79 – 3.70 (m, 1H), 3.50 – 3.40 (m, 2H), 2.51 (q,  $J = 7.82$  Hz, 1H), 2.35 (s, 3H), 1.99 – 1.86 (m, 3H), 1.78 – 1.68 (m, 1H), 1.02 (t,  $J = 7.27$  Hz, 3H), 0.90 (t,  $J = 7.47$  Hz, 3H);  $^{13}\text{C NMR}$  (101 MHz,  $\text{CDCl}_3$ )  $\delta$  176.2, 175.5, 169.7, 166.5, 146.4, 138.5, 135.6, 135.4, 135.1, 130.5, 129.6, 129.1, 128.5, 128.4, 128.2, 128.1, 126.3, 125.3, 66.7, 66.6, 43.6, 37.0, 29.6, 23.1, 21.2, 21.1, 13.3, 12.2; **IR** (KBr): 2927, 2832, 1711, 1657, 1586, 1362, 1183, 777 ( $\text{cm}^{-1}$ ); **HRMS** (ESI-TOF):  $m/z$  calcd for  $\text{C}_{37}\text{H}_{37}\text{NO}_6$  [ $\text{M}+\text{H}$ ] $^+$  = 592.2694, found = 592.2695.

***Benzyl (Z)-6-(2-(benzyloxy)-2-oxoethyl)-2-(4-chlorophenyl)-7-ethyl-1,3-dioxo-4-propylidene-2,3,3a,4,7,7a-hexahydro-1H-isoindole-5-carboxylate (4ah)***

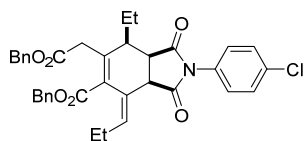

Yield: 115.4 mg, 94%, a pale yellow gel liquid;  $^1\text{H NMR}$  (400 MHz,  $\text{CDCl}_3$ )  $\delta$  7.34 – 7.27 (m, 12H), 7.09 (d,  $J = 8.70$  Hz, 2H), 5.91 (t,  $J = 7.30$  Hz, 1H), 5.21 (d,  $J = 12.37$  Hz, 1H), 5.07 (d,  $J = 12.37$  Hz, 1H), 5.04 (d,  $J = 12.25$  Hz, 1H), 4.97 (d,  $J = 12.37$  Hz, 1H), 3.82 – 3.72 (m, 2H), 3.57 (d,  $J = 16.66$  Hz, 1H), 3.44 (dd,  $J = 9.01, 5.00$  Hz, 1H), 2.45 (q,  $J = 7.77$  Hz, 1H), 1.96 (dd,  $J = 13.51, 6.07$  Hz, 1H), 1.89 (q,  $J = 7.42$  Hz, 2H), 1.78 – 1.71 (m, 1H), 1.03 (t,  $J = 7.27$  Hz, 3H), 0.90 (t,  $J = 7.47$  Hz, 3H);  $^{13}\text{C NMR}$  (101 MHz,  $\text{CDCl}_3$ )  $\delta$  175.9, 175.1, 169.7, 166.5, 146.0, 135.7, 135.6, 135.4, 134.2, 130.6, 130.3, 129.1, 128.5, 128.5, 128.2, 128.1, 127.8, 125.3, 66.8, 66.6, 48.5, 43.4, 43.3, 36.4, 23.1, 21.1, 13.4, 12.3; **IR** (KBr): 2964, 2832, 1712, 1657, 1588, 1493, 1363, 1182, 777 ( $\text{cm}^{-1}$ ); **HRMS** (ESI-TOF):  $m/z$  calcd for  $\text{C}_{36}\text{H}_{34}\text{ClNO}_6$  [ $\text{M}+\text{H}$ ] $^+$  = 612.2147, 613.2181, found = 612.2148, 613.2182.

**Benzyl (Z)-6-(2-(benzyloxy)-2-oxoethyl)-7-ethyl-2-methyl-1,3-dioxo-4-propylidene-2,3,3a,4,7,7a-hexahydro-1H-isoindole-5-carboxylate (4ai)**

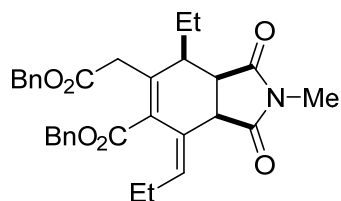

Yield: 110.8 mg, 100%, a pale yellow gel liquid;  $^1\text{H NMR}$  (400 MHz,  $\text{CDCl}_3$ )  $\delta$  7.34 – 7.29 (m, 10H), 5.90 (t,  $J = 7.21$  Hz, 1H), 5.18 (d,  $J = 12.57$  Hz, 1H), 5.10 (d,  $J = 12.56$  Hz, 1H), 5.06 (d,  $J = 2.76$  Hz, 2H), 3.88 (d,  $J = 16.70$  Hz, 1H), 3.65 – 3.55 (m, 1H), 3.49 (d,  $J = 16.69$  Hz, 1H), 3.25 (dd,  $J = 9.03$ , 5.44 Hz, 1H), 2.90 (s, 3H), 2.48 – 2.38 (m, 1H), 1.89 – 1.75 (m, 3H), 1.67 – 1.59 (m, 1H), 0.97 (t,  $J = 7.30$  Hz, 3H), 0.85 (d,  $J = 7.49$  Hz, 3H);  $^{13}\text{C NMR}$  (101 MHz,  $\text{CDCl}_3$ )  $\delta$  177.0, 176.4, 169.7, 166.4, 146.4, 135.6, 135.5, 134.6, 130.7, 128.5, 128.4, 128.2, 128.1, 128.1, 128.0, 125.4, 66.8, 66.4, 43.6, 37.0, 29.7, 24.8, 23.1, 21.2, 13.3, 12.3; **IR** (KBr): 2956, 2832, 2716, 1709, 1592, 1362, 776 ( $\text{cm}^{-1}$ ); **HRMS** (ESI-TOF):  $m/z$  calcd for  $\text{C}_{31}\text{H}_{33}\text{NO}_6[\text{M}+\text{H}]^+ = 516.2381$ , found = 516.2383.

**Benzyl (Z)-6-(2-(benzyloxy)-2-oxoethyl)-2-(2-(tert-butyl)phenyl)-7-ethyl-1,3-dioxo-4-propylidene-2,3,3a,4,7,7a-hexahydro-1H-isoindole-5-carboxylate (4aj)**

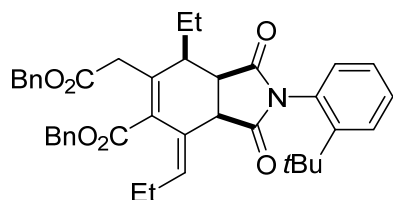

Yield: 33.4 mg, 26%, a pale yellow gel liquid;  $^1\text{H NMR}$   $\delta$  7.48 (d,  $J = 8.08$  Hz, 1H), 7.37 – 7.31 (m, 10H), 7.29 (d,  $J = 1.94$  Hz, 1H), 7.23 (d,  $J = 7.51$  Hz, 1H), 6.75 (d,  $J = 9.05$  Hz, 1H), 5.70 (t,  $J = 7.28$  Hz, 1H), 5.20 – 5.06 (m, 4H), 3.86 (d,  $J = 15.96$  Hz, 1H), 3.78 (d,  $J = 9.53$  Hz, 1H), 3.39 (dd,  $J = 9.28$ , 1.61 Hz, 1H), 3.17 (d,  $J = 15.96$  Hz, 1H), 2.88 (dd,  $J = 9.01$ , 3.87 Hz, 1H), 1.88 – 1.80 (m, 3H), 1.55 – 1.46 (m, 1H), 1.04 (s, 9H), 0.98 (t,  $J = 7.38$  Hz, 3H), 0.86 (t,  $J = 7.47$  Hz, 3H);  $^{13}\text{C NMR}$  (101 MHz,  $\text{CDCl}_3$ )  $\delta$  179.3, 177.0, 169.5, 165.8, 148.6, 147.9, 137.7, 135.7, 135.2, 131.7, 130.7, 129.7, 129.6, 128.5, 128.4, 128.4, 128.3, 128.2, 128.1, 127.4, 124.2, 66.8, 66.6, 49.1, 45.6, 44.0, 41.9, 35.1, 31.1, 29.7, 23.8, 23.2, 13.3, 12.2; **IR** (KBr): 2957, 2832, 2716, 1909, 1593, 1362, 776 ( $\text{cm}^{-1}$ ); **HRMS** (ESI-TOF):  $m/z$  calcd for  $\text{C}_{40}\text{H}_{43}\text{NO}_6[\text{M}+\text{H}]^+ = 634.3163$ , found = 634.3171.

***Benzyl (Z)-6-(2-(benzyloxy)-2-oxoethyl)-7-ethyl-2-(3-nitrophenyl)-1,3-dioxo-4-propylidene-2,3,3a,4,7,7a-hexahydro-1H-isoindole-5-carboxylate (4ak)***

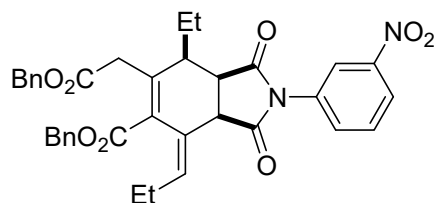

Yield: 127.7 mg, 100%, a pale yellow gel liquid;  $^1\text{H NMR}$   $\delta$  8.27 (s, 1H), 8.19 (d,  $J = 8.02$  Hz, 1H), 7.57 – 7.48 (m, 2H), 7.33 – 7.24 (m, 10H), 5.88 (t,  $J = 7.31$  Hz, 1H), 5.21 – 5.08 (m, 2H), 5.07 – 4.98 (m, 2H), 3.81 (d,  $J = 9.02$  Hz, 1H), 3.78 – 3.65 (m, 2H), 3.50 (dd,  $J = 8.99, 5.10$  Hz, 1H), 2.44 (q,  $J = 8.15, 7.69$  Hz, 1H), 2.06 – 1.95 (m, 1H), 1.94 – 1.86 (m, 2H), 1.84 – 1.75 (m, 1H), 1.07 (t,  $J = 7.25$  Hz, 3H), 0.90 (t,  $J = 7.47$  Hz, 3H);  $^{13}\text{C NMR}$  (101 MHz,  $\text{CDCl}_3$ )  $\delta$  175.4, 174.8, 169.7, 166.4, 148.3, 145.7, 136.3, 135.6, 135.3, 132.9, 132.6, 130.8, 129.6, 128.5, 128.4, 128.2, 128.2, 128.1, 125.3, 123.0, 122.1, 66.9, 66.6, 49.0, 43.4, 43.3, 35.7, 29.6, 23.2, 21.1, 13.3, 12.3; **IR** (KBr): 2964, 2832, 1716, 1589, 1532, 1363, 1181, 776, 737, 698 ( $\text{cm}^{-1}$ ); **HRMS** (ESI-TOF):  $m/z$  calcd for  $\text{C}_{36}\text{H}_{34}\text{N}_2\text{O}_8[\text{M}+\text{H}]^+$  = 623.2388, found = 623.2385.

***Benzyl (Z)-2-(benzo[d][1,3]dioxol-5-yl)-6-(2-(benzyloxy)-2-oxoethyl)-7-ethyl-1,3-dioxo-4-propylidene-2,3,3a,4,7,7a-hexahydro-1H-isoindole-5-carboxylate (4al)***

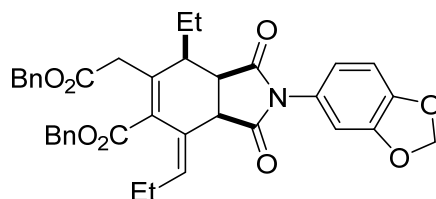

Yield: 121.6 mg, 98%, a pale yellow gel liquid;  $^1\text{H NMR}$  (400 MHz,  $\text{CDCl}_3$ )  $\delta$  7.34 – 7.30 (m, 10H), 6.76 (d,  $J = 8.3$  Hz, 1H), 6.67 (d,  $J = 2.1$  Hz, 1H), 6.59 (dd,  $J = 8.3, 2.1$  Hz, 1H), 5.98 (s, 2H), 5.94 (t,  $J = 7.2$  Hz, 1H), 5.21 – 5.08 (m, 2H), 5.08 – 4.99 (m, 2H), 3.86 (d,  $J = 16.7$  Hz, 1H), 3.73 (d,  $J = 9.6$  Hz, 1H), 3.50 (d,  $J = 16.8$  Hz, 1H), 3.41 (dd,  $J = 9.2, 5.1$  Hz, 1H), 2.48 (q,  $J = 7.7$  Hz, 1H), 1.98 – 1.91 (m, 1H), 1.91 – 1.85 (m, 2H), 1.75 – 1.68 (m, 1H), 1.02 (t,  $J = 7.3$  Hz, 3H), 0.89 (t,  $J = 7.5$  Hz, 3H);  $^{13}\text{C NMR}$  (101 MHz,  $\text{CDCl}_3$ )  $\delta$  176.2, 175.5, 169.7, 166.5, 147.9, 147.6, 146.2, 135.6, 135.4, 135.3, 130.5, 128.5, 128.4, 128.2, 128.1, 125.3, 120.5, 108.2, 107.8, 101.6, 66.8, 66.6, 43.5, 43.3, 36.8, 26.9, 23.1, 21.1, 13.3, 12.3; **IR** (KBr): 2965, 2876, 2832, 1720, 1600, 1503, 1353, 1245, 1037, 777, 738, 698 ( $\text{cm}^{-1}$ ); **HRMS** (ESI-TOF):  $m/z$  calcd for  $\text{C}_{37}\text{H}_{35}\text{NO}_8[\text{M}+\text{H}]^+$  = 622.2435, found = 622.2441.

**Benzyl (Z)-6-(2-(benzyloxy)-2-oxoethyl)-7-ethyl-2-(3-ethynylphenyl)-1,3-dioxo-4-propylidene-2,3,3a,4,7,7a-hexahydro-1H-isoindole-5-carboxylate (4am)**

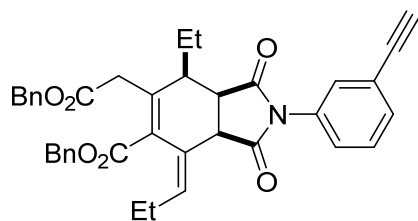

Yield: 128.1 mg, 100%, a pale yellow gel liquid;  $^1\text{H NMR}$   $\delta$  7.45 (d,  $J = 7.70$  Hz, 1H), 7.39 – 7.29 (m, 12H), 7.15 (d,  $J = 8.03$  Hz, 1H), 5.93 (t,  $J = 7.55$  Hz, 1H), 5.19 – 5.09 (m, 2H), 5.07 – 4.97 (m, 2H), 3.84 (d,  $J = 16.57$  Hz, 1H), 3.75 (d,  $J = 9.08$  Hz, 1H), 3.52 (d,  $J = 16.58$  Hz, 1H), 3.45 – 3.40 (m, 1H), 2.48 (d,  $J = 7.03$  Hz, 1H), 1.96 – 1.85 (m, 3H), 1.77 – 1.68 (m, 1H), 1.02 (t,  $J = 7.18$  Hz, 3H), 0.88 (t,  $J = 7.50$  Hz, 4H);  $^{13}\text{C NMR}$  (101 MHz,  $\text{CDCl}_3$ )  $\delta$  175.8, 175.1, 169.7, 166.5, 146.1, 135.6, 135.5, 135.4, 132.1, 131.9, 130.6, 130.2, 129.0, 128.5, 128.5, 128.2, 128.1, 127.1, 125.2, 123.1, 82.5, 78.2, 66.8, 66.6, 48.1, 43.5, 43.4, 36.7, 23.1, 21.1, 13.3, 12.3; **IR** (KBr): 2964, 2832, 1711, 1657, 1589, 1363, 776 ( $\text{cm}^{-1}$ ); **HRMS** (ESI-TOF):  $m/z$  calcd for  $\text{C}_{38}\text{H}_{35}\text{NO}_6[\text{M}+\text{H}]^+ = 602.2537$ , found = 602.2537.

**Benzyl (Z)-6-(2-(benzyloxy)-2-oxoethyl)-2-(3-(Z)-5-(2-(benzyloxy)-2-oxoethyl)-6-((benzyloxy)carbonyl)-4-ethyl-1,3-dioxo-7-propylidene-1,3,3a,4,7,7a-hexahydro-2H-isoindol-2-yl)phenyl)-7-ethyl-1,3-dioxo-4-propylidene-2,3,3a,4,7,7a-hexahydro-1H-isoindole-5-carboxylate (4an)**

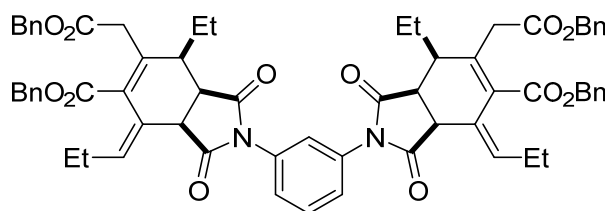

Yield: 205.9 mg, 96%, a pale yellow gel liquid;  $^1\text{H NMR}$   $\delta$  7.34 – 7.27 (m, 22H), 7.14 (t,  $J = 9.28$  Hz, 2H), 5.93 (t,  $J = 7.42$  Hz, 2H), 5.21 – 5.09 (m, 4H), 5.08 – 4.97 (m, 4H), 3.86 (dd,  $J = 16.70, 7.79$  Hz, 2H), 3.69 (dd,  $J = 8.85, 3.72$  Hz, 2H), 3.47 (d,  $J = 16.61$  Hz, 2H), 3.40 – 3.32 (m, 2H), 2.51 – 2.41 (m, 2H), 1.97 – 1.83 (m, 6H), 1.75 – 1.64 (m, 2H), 0.99 (t,  $J = 6.70$  Hz, 6H), 0.88 (t,  $J = 7.45$  Hz, 6H);  $^{13}\text{C NMR}$  (101 MHz,  $\text{CDCl}_3$ )  $\delta$  175.5, 174.9, 169.7, 166.5, 146.2, 135.6, 135.4, 132.1, 130.5, 129.1, 128.5, 128.4, 128.2, 128.1, 128.1, 128.0, 126.2, 125.2, 124.0, 66.8, 66.5, 43.5, 43.5, 43.3, 36.8, 23.1, 21.0, 13.3, 12.2; **IR** (KBr): 2964, 2875, 2832, 1777, 1712, 1601, 1494, 1363, 1183, 776, 739, 697 ( $\text{cm}^{-1}$ ); **HRMS** (ESI-TOF):  $m/z$  calcd for  $\text{C}_{66}\text{H}_{64}\text{N}_2\text{O}_{12}[\text{M}+\text{H}]^+ = 1077.4532$ , found = 1077.4528.



**Benzyl (Z)-6-(2-(benzyloxy)-2-oxoethyl)-2-(3-(3-(Z)-5-(2-(benzyloxy)-2-oxoethyl)-6-((benzyloxy)carbonyl)-4-ethyl-1,3-dioxo-7-propylidene-1,3,3a,4,7,7a-hexahydro-2H-isoindol-2-yl)benzyl)phenyl)-7-ethyl-1,3-dioxo-4-propylidene-2,3,3a,4,7,7a-hexahydro-1H-isoindole-5-carboxylate (4ao)**

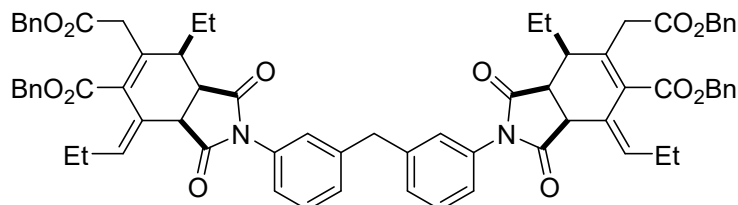

Yield: 211.6 mg, 91%, a pale yellow gel liquid;  $^1\text{H NMR}$   $\delta$  7.34 – 7.26 (m, 20H), 7.14 (d,  $J$  = 8.36 Hz, 4H), 7.06 (d,  $J$  = 8.37 Hz, 4H), 5.98 – 5.93 (m, 2H), 5.22 – 5.08 (m, 4H), 5.07 – 4.98 (m, 4H), 3.97 (s, 2H), 3.89 (d,  $J$  = 16.58 Hz, 2H), 3.75 (d,  $J$  = 9.11 Hz, 2H), 3.49 – 3.39 (m, 4H), 2.49 (q,  $J$  = 7.70 Hz, 2H), 1.97 – 1.85 (m, 6H), 1.76 – 1.67 (m, 2H), 1.01 (t,  $J$  = 7.25 Hz, 6H), 0.89 (t,  $J$  = 7.47 Hz, 6H);  $^{13}\text{C NMR}$  (101 MHz,  $\text{CDCl}_3$ )  $\delta$  176.1, 175.4, 169.8, 166.5, 146.3, 140.7, 135.7, 135.4, 135.2, 130.5, 130.0, 129.5, 128.5, 128.5, 128.2, 128.2, 128.1, 126.5, 125.3, 66.7, 66.6, 43.6, 43.4, 41.1, 37.0, 26.9, 23.1, 21.1, 13.4, 12.3; **IR** (KBr): 2964, 2832, 1712, 1597, 1513, 1363, 1182, 776, 741 ( $\text{cm}^{-1}$ ); **HRMS** (ESI-TOF):  $m/z$  calcd for  $\text{C}_{73}\text{H}_{70}\text{N}_2\text{O}_{12}[\text{M}+\text{H}]^+$  = 1167.5002, found = 1167.5002.

**Methyl (Z)-2-(4-bromophenyl)-4-ethylidene-6-(2-methoxy-2-oxoethyl)-7-methyl-1,3-dioxo-2,3,3a,4,7,7a-hexahydro-1H-isoindole-5-carboxylate (4lb)**

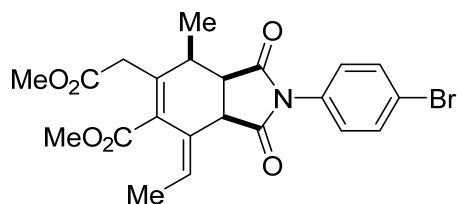

Yield: 128.1 mg, 100%, White solid; M.p. 106 – 107 °C (Petroleum ether/EtOAc);  $^1\text{H NMR}$   $\delta$  7.57 (d,  $J$  = 8.66 Hz, 2H), 7.15 (d,  $J$  = 8.78 Hz, 2H), 6.06 (q,  $J$  = 6.86 Hz, 1H), 3.79 (d,  $J$  = 9.16 Hz, 1H), 3.74 (s, 3H), 3.66 (d,  $J$  = 6.42 Hz, 2H), 3.61 (s, 3H), 3.32 (dd,  $J$  = 9.08, 5.36 Hz, 1H), 2.81 – 2.64 (m, 1H), 1.62 (d,  $J$  = 7.18 Hz, 3H), 1.37 (d,  $J$  = 7.42 Hz, 3H);  $^{13}\text{C NMR}$  (101 MHz,  $\text{CDCl}_3$ )  $\delta$  175.8, 175.1, 170.4, 167.1, 146.6, 132.2, 130.9, 129.9, 128.4, 128.1, 126.6, 122.4, 52.1, 52.0, 48.1, 46.0, 36.5, 35.8, 15.1, 13.9; **IR** (KBr): 2951, 2832, 1712, 1597, 1490, 1364, 1192, 1069, 1012, 816, 776, 796, 734 ( $\text{cm}^{-1}$ ); **HRMS** (ESI-TOF):  $m/z$  calcd for  $\text{C}_{38}\text{H}_{35}\text{NO}_6[\text{M}+\text{H}]^+$  = 602.2537, 478.0683, found = 602.2537, 478.0695.

## G. Gram-Scale Synthesis of 4aa

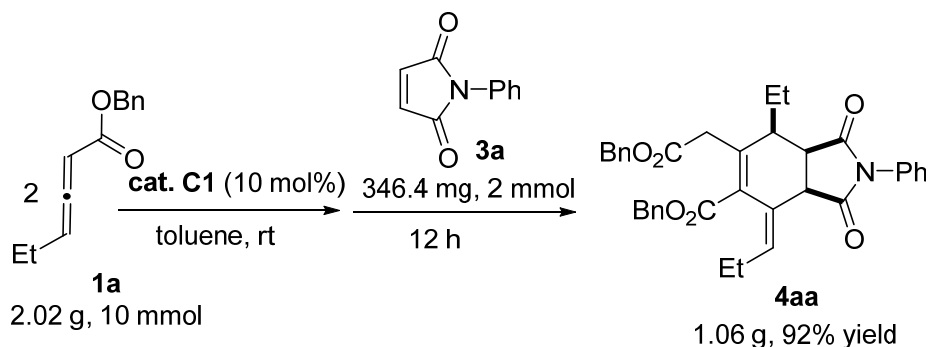

To a dried round-bottom flask with a magnetic stirring bar were added **1a** (10 mmol, 5.0 equiv.), toluene (20 mL) and catalyst **C1** (0.2 mmol, 0.1 equiv.) at room temperature. The resulting mixture was stirred for 4 h, Then **3a** (2 mmol, 1.0 equiv.) was added and was stirred for 12 h until the consumption of **3a**. The mixture was purified directly by flash column chromatography (PE / ethyl acetate = 5 / 1) to afford 1.06 g of **4aa** (92% yield).

## H. Transformations of 4aa

### (a) Oxidation of compound 4aa

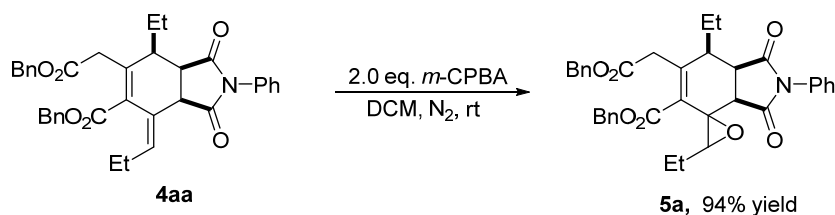

Under nitrogen atmosphere, compound **4aa** (115.6 mg, 0.2 mmol, 1.0 eq) was added to a 15 mL Schlenk tube, followed by adding 1 mL dry DCM, and 85% *m*-CPBA (69.0 mg, 0.4 mmol, 2.0 eq) was added at room temperature. The resulting mixture was stirred for 12 h. After the completely consumption of **4aa** monitored by TLC, the mixture was quenched by saturated NaHCO<sub>3</sub> aqueous (5 mL) and separated. The aqueous phase was extracted by DCM (10 mL × 2), and the organic phase was combined, dried by Na<sub>2</sub>SO<sub>4</sub> and filtered. The filtrate was concentrated under vacuum to remove solvent and the residue was purified by column chromatography on silica gel with PE / ethyl acetate = 5 / 1 as eluent to afford product **5a** (111.3 mg, 94%) as a pale yellow gel liquid. <sup>1</sup>H NMR (400 MHz, DMSO-*d*<sub>6</sub>) δ 7.42 (dd, *J* = 11.27, 7.22 Hz, 3H), 7.36 – 7.30 (m, 10H), 7.20 (d, *J* = 7.22 Hz, 2H), 5.21 (d, *J* = 12.62 Hz, 1H), 5.09 (d, *J* = 12.74 Hz, 1H), 5.04 (d, *J* = 4.70 Hz, 2H), 3.65 – 3.58 (m, 1H), 3.53 – 3.44 (m, 3H), 2.88 (q, *J* = 7.64 Hz, 1H), 1.90 – 1.69 (m, 1H), 1.58 (dd, *J* = 8.83, 5.20 Hz, 2H), 1.20 – 1.12 (m, 1H), 0.96 – 0.90 (m, 6H), 0.90 – 0.80 (m, 1H); <sup>13</sup>C NMR (101 MHz, DMSO-*d*<sub>6</sub>) δ 175.6, 173.4, 169.1, 165.3, 135.8, 135.4, 132.0, 128.8, 128.4, 128.3, 128.0, 128.0, 127.8, 127.0, 66.3, 66.1, 62.6, 60.0, 41.3, 20.7, 12.0, 10.5; IR (KBr): 2968, 2832, 1715, 1597, 1499, 1186, 776, 749, 696 (cm<sup>-1</sup>); HRMS (ESI-TOF): *m/z* calcd for C<sub>36</sub>H<sub>35</sub>NO<sub>7</sub> [M+H]<sup>+</sup> = 594.2486, found = 594.2495.

## (b) Reduction of compound **4aa**

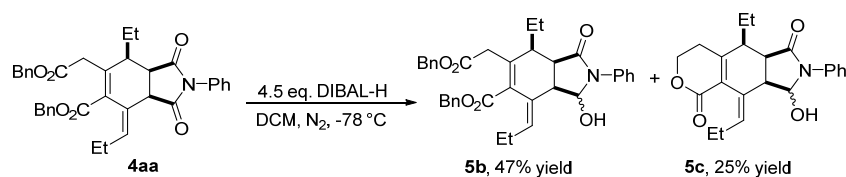

Under nitrogen atmosphere, compound **4aa** (115.6 mg, 0.2 mmol, 1.0 eq) and anhydrous DCM (1 mL) was added into a 15 mL Schlenk tube, followed by dropwise addition of DIBAL-H (0.6 mL, 0.9 mmol, 1.5 M in toluene) at -78 °C over 30 min. The mixture was stirred at the same temperature. After 6 hours the compound **4aa** was consumed monitored by TLC, and the reaction was quenched by saturated potassium sodium tartrate solution and stirred until the mixture was clear. The mixture was extracted by DCM (10 mL × 2), and the organic phase was combined, dried by Na<sub>2</sub>SO<sub>4</sub> and filtered. The filtrate was concentrated under vacuum to remove solvent and the residue was purified by column chromatography on silica gel with PE / ethyl acetate = 3 / 1 to PE / ethyl acetate = 2 / 1 as eluent to afford product **5b** (55.7 mg, 47%) and product **5c** (18.2 mg, 25%) as a pale yellow gel liquid. Characterization data for **5b**: <sup>1</sup>H NMR (400 MHz, CDCl<sub>3</sub>) δ 7.36 – 7.29 (m, 8H), 7.25 – 7.18 (m, 7H), 5.63 – 5.52 (m, 2H), 5.19 – 5.03 (m, 4H), 3.92 (d, *J* = 13.24 Hz, 1H), 3.73 – 3.54 (m, 2H), 3.49 (dd, *J* = 8.97, 6.87 Hz, 1H), 3.26 (dd, *J* = 8.78, 3.34 Hz, 1H), 2.36 (dd, *J* = 14.98, 8.89 Hz, 1H), 2.17 – 2.10 (m, 1H), 1.92 – 1.80 (m, 3H), 1.04 (t, *J* = 7.27 Hz, 3H), 0.88 (t, *J* = 7.46 Hz, 3H); <sup>13</sup>C NMR (101 MHz, CDCl<sub>3</sub>) δ 173.0, 170.8, 167.9, 149.7, 139.7, 135.5, 129.5, 129.4, 129.3, 129.2, 128.9, 128.8, 127.5, 126.9, 125.6, 84.5, 68.1, 67.4, 48.2, 45.2, 44.8, 36.2, 30.4, 24.0, 21.4, 14.1, 13.0; IR (KBr): 2960, 2832, 1691, 1592, 1536, 1363, 776 (cm<sup>-1</sup>); HRMS (ESI-TOF): *m/z* calcd for C<sub>36</sub>H<sub>37</sub>NO<sub>6</sub> [M+H]<sup>+</sup> = 580.2694, found = 580.2702.

Characterization data for **5c**: <sup>1</sup>H NMR (400 MHz, CDCl<sub>3</sub>) δ 7.33 (t, *J* = 7.73 Hz, 2H), 7.23 – 7.16 (m, 3H), 5.69 (t, *J* = 7.36 Hz, 1H), 5.54 (dd, *J* = 13.36, 6.68 Hz, 1H), 4.49 (dd, *J* = 11.08, 4.52 Hz, 1H), 4.38 – 4.29 (m, 1H), 3.74 (d, *J* = 13.38 Hz, 1H), 3.58 – 3.52 (m, 1H), 3.32 (dd, *J* = 8.31, 2.88 Hz, 1H), 2.80 – 2.66 (m, 1H), 2.54 (d, *J* = 15.96 Hz, 1H), 2.33 (t, *J* = 7.25 Hz, 2H), 2.18 – 2.06 (m, 1H), 2.02 – 1.89 (m, 2H), 1.11 (t, *J* = 7.06 Hz, 3H), 1.03 (t, *J* = 7.48 Hz, 3H); <sup>13</sup>C NMR (101 MHz, CDCl<sub>3</sub>) δ 172.0, 163.6, 162.0, 139.5, 136.1, 128.7, 126.7, 125.5, 122.9, 83.6, 65.6, 47.5, 44.7, 43.5, 26.2, 24.0, 20.3, 13.3, 12.6; IR (KBr): 2963, 1692, 1658, 1596, 1363, 776 (cm<sup>-1</sup>); HRMS (ESI-TOF): *m/z* calcd for C<sub>22</sub>H<sub>25</sub>NO<sub>4</sub> [M+H]<sup>+</sup> = 368.1856, found = 368.1861.

### (c) Aromatization of compound **4aa**

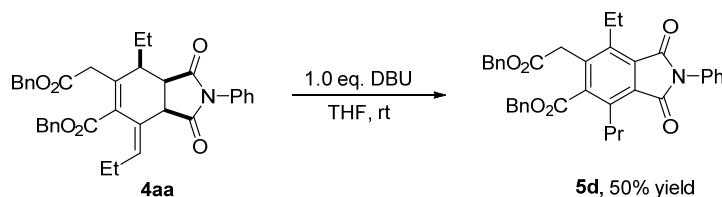

To a dried seal tube with a magnetic stirring bar were added **4aa** (0.2 mmol, 1.0 equiv.), THF (1 mL) and DBU (0.2 mmol, 1 equiv.) at room temperature. The resulting mixture was stirred until **4aa** was consumed monitored by TLC. The reaction mixture was concentrated under vacuum to remove solvent and the residue was purified by flash column chromatography (PE / ethyl acetate = 5 / 1) to afford product **5d** (57.6 mg, 50%) as a white solid.; M.p. 82 – 83°C (Petroleum ether/EtOAc); <sup>1</sup>H NMR (400 MHz, CDCl<sub>3</sub>) δ 7.49 (t, *J* = 7.68 Hz, 2H), 7.40 (d, *J* = 7.72 Hz, 5H), 7.38 – 7.31 (m, 6H), 7.29 (d, *J* = 7.62 Hz, 2H), 5.29 (s, 2H), 5.05 (s, 2H), 3.79 (s, 2H), 3.16 (q, *J* = 7.55 Hz, 2H), 2.94 – 2.86 (m, 2H), 1.55 (s, 3H), 1.18 (t, *J* = 7.48 Hz, 3H), 0.84 (t, *J* = 7.30 Hz, 3H); <sup>13</sup>C NMR (101 MHz, CDCl<sub>3</sub>) δ 169.4, 168.0, 142.5, 141.5, 138.3, 136.7, 134.7, 129.3, 129.1, 129.0, 128.8, 128.7, 128.5, 128.4, 128.3, 128.1, 126.7, 67.7, 67.1, 35.3, 31.3, 24.6, 21.1, 14.5, 14.3; IR (KBr): 2962, 2832, 1713, 1593, 1363, 1172, 776, 741; HRMS (ESI-TOF): *m/z* calcd for C<sub>36</sub>H<sub>35</sub>NO<sub>6</sub> [M+H]<sup>+</sup> = 576.2381, found = 576.2390.

### I. Diels-Alder reaction of the allenolate RC-adduct with DMAD

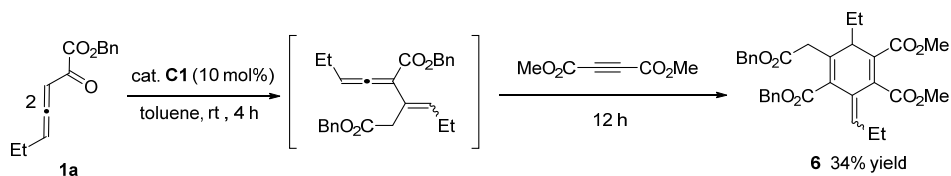

To a dried seal tube with a magnetic stirring bar were added **1a** (1.0 mmol, 5.0 equiv.), toluene (2 mL) and catalyst **C1** (0.02 mmol, 0.1 equiv.) at room temperature. The tube was sealed and the mixture was stirred for 4 h, Then DMAD (0.2 mmol, 1.0 equiv.) was added and was stirred for 12 h until consumption of DMAD monitored by TLC. The mixture was purified directly by flash column chromatography (PE / ethyl acetate = 5 / 1) to afford **6** (37.2 mg, 34%) as a pale yellow gel liquid. <sup>1</sup>H NMR (400 MHz, CDCl<sub>3</sub>) δ 7.37 – 7.30 (m, 10H), 5.72 (t, *J* = 7.52 Hz, 1H), 5.23 (d, *J* = 12.28 Hz, 1H), 5.13 (d, *J* = 12.18 Hz, 1H), 5.07 (d, *J* = 6.27 Hz, 2H), 3.91 (s, 3H), 3.80 (d, *J* = 15.71 Hz, 1H), 3.75 (s, 3H), 3.57 (t, *J* = 5.07 Hz, 1H), 3.23 (d, *J* = 15.71 Hz, 1H), 2.04 – 1.95 (m, 2H), 1.89 – 1.80 (m, 1H),

1.79 – 1.69 (m, 1H), 0.92 (t,  $J = 7.41$  Hz, 3H), 0.77 (t,  $J = 7.47$  Hz, 3H);  $^{13}\text{C}$  NMR (101 MHz,  $\text{CDCl}_3$ )  $\delta$  169.3, 167.8, 165.4, 140.6, 138.0, 135.6, 135.1, 128.6, 128.4, 128.3, 128.1, 128.1, 127.4, 126.9, 66.9, 66.7, 52.5, 52.2, 43.5, 38.1, 27.0, 22.8, 13.4, 9.3; IR (KBr):2953, 2878, 1735, 1631, 1455, 1363, 777, 751, 698; HRMS (ESI-TOF):  $m/z$  calcd for  $\text{C}_{32}\text{H}_{34}\text{O}_8$   $[\text{M}+\text{H}]^+ = 547.2326$ , found = 547.2328.

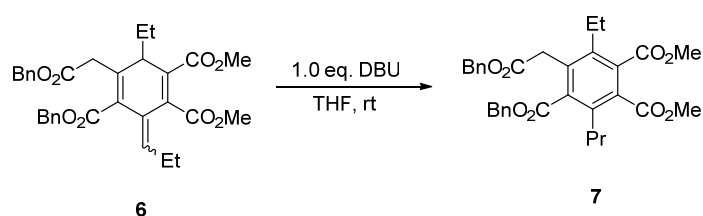

To a dried seal tube with a magnetic stirring bar were added **6** (0.2 mmol, 1 equiv.), THF (1 mL) and DBU (0.2 mmol, 1 equiv.) at room temperature. The tube was sealed and the mixture was stirred until compound **6a** was consumed monitored by TLC. The reaction mixture was concentrated under vacuum to remove solvent and the residue was purified by flash column chromatography (PE / ethyl acetate = 5 / 1) to afford product **7** (54.7 mg, 50%) as a pale yellow gel liquid.  $^1\text{H}$  NMR (400 MHz,  $\text{CDCl}_3$ )  $\delta$  7.37 (d,  $J = 5.40$  Hz, 2H), 7.32 (d,  $J = 5.87$  Hz, 6H), 7.26 (d,  $J = 5.82$  Hz, 2H), 5.23 (s, 2H), 5.02 (s, 2H), 3.84 (d,  $J = 6.06$  Hz, 6H), 3.70 (s, 2H), 2.65 (q,  $J = 7.73$  Hz, 2H), 2.54 – 2.48 (m, 2H), 1.43 (q,  $J = 7.69$  Hz, 2H), 1.10 (t,  $J = 7.61$  Hz, 3H), 0.73 (t,  $J = 7.30$  Hz, 3H);  $^{13}\text{C}$  NMR (101 MHz,  $\text{CDCl}_3$ )  $\delta$  169.6, 168.5, 168.5, 139.6, 137.8, 136.3, 135.5, 134.8, 132.0, 129.0, 128.6, 128.6, 128.4, 128.2, 128.1, 67.4, 66.8, 52.4, 35.7, 33.3, 24.7, 23.7, 14.9, 14.2; IR (KBr):2956, 2874, 1735, 1631, 1455, 1363, 1079, 751, 698; HRMS (ESI-TOF):  $m/z$  calcd for  $\text{C}_{32}\text{H}_{34}\text{O}_8$   $[\text{M}+\text{H}]^+ = 547.2326$ , found = 547.2333.

## J. X-Ray crystallographic analysis of 4**lb**

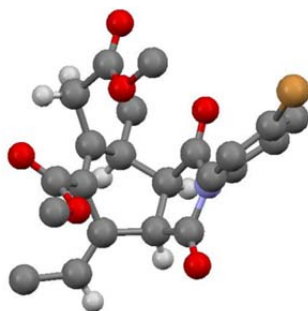

Figure 1. X-ray structure of **4lb**

The title compound was recrystallized from hexane/DCM, by slow evaporation of solvent.

Table 1. Crystal data and structure refinement for **4lb**

|                                   |                                                     |                     |
|-----------------------------------|-----------------------------------------------------|---------------------|
| Empirical formula                 | C <sub>22</sub> H <sub>22</sub> Br N O <sub>6</sub> |                     |
| Formula weight                    | 474.32                                              |                     |
| Temperature                       | 296 K                                               |                     |
| Wavelength                        | 0.71073 Å                                           |                     |
| Crystal system                    | monoclinic                                          |                     |
| Space group                       | C 2/c                                               |                     |
| Unit cell dimensions              | a = 26.095(4) Å                                     | α = 90.             |
|                                   | b = 9.3443 Å                                        | β = 125.058(2) (4). |
|                                   | c = 21.347 (4) Å                                    | γ = 90.             |
| Volume                            | 4260.9(10) Å <sup>3</sup>                           |                     |
| Z                                 | 8                                                   |                     |
| Density (calculated)              | 1.479 Mg/m <sup>3</sup>                             |                     |
| Absorption coefficient            | 1.965 mm <sup>-1</sup>                              |                     |
| F(000)                            | 1944                                                |                     |
| Crystal size                      | 0.180 x 0.160 x 0.140 mm <sup>3</sup>               |                     |
| Theta range for data collection   | 1.907 to 27.475°.                                   |                     |
| Index ranges                      | -33 ≤ h ≤ 33, -12 ≤ k ≤ 12, -27 ≤ l ≤ 27            |                     |
| Reflections collected             | 19336                                               |                     |
| Independent reflections           | 4870 [R(int) = 0.0408]                              |                     |
| Completeness to theta = 25.242°   | 100.0 %                                             |                     |
| Refinement method                 | Full-matrix least-squares on F <sup>2</sup>         |                     |
| Data / restraints / parameters    | 4870/ 0 / 275                                       |                     |
| Goodness-of-fit on F <sup>2</sup> | 1.041                                               |                     |
| Final R indices [I > 2σ(I)]       | R1 = 0.0388, wR2 = 0.0966                           |                     |
| R indices (all data)              | R1 = 0.0648, wR2 = 0.1082                           |                     |
| Largest diff. peak and hole       | 0.412 and -0.449 e.Å <sup>-3</sup>                  |                     |

## **K.References**

- [1] Y. Gao, J. Zhang, W. Shan, W. Fei, J. Yao and W. Yao, *Org. Lett.*, **2021**, *23*, 6377–6381.
- [2] W. Fei, P. Xu, J. Hou and W. Yao, *Chem. Commun.*, **2020**, *56*, 11669–11672.
- [3] (a) M. Skrifvars and H.-W. Schmidt, *Syn. comm.*, **2006**, *25*, 1809–1815; (b) H. Wang, Y. Wei, Y. Li, S. Long, L.-J. Sun, S. Li and Y.-W. Lin, *Org. Lett.*, **2022**, *24*, 6494–6498.

# L. NMR Spectra

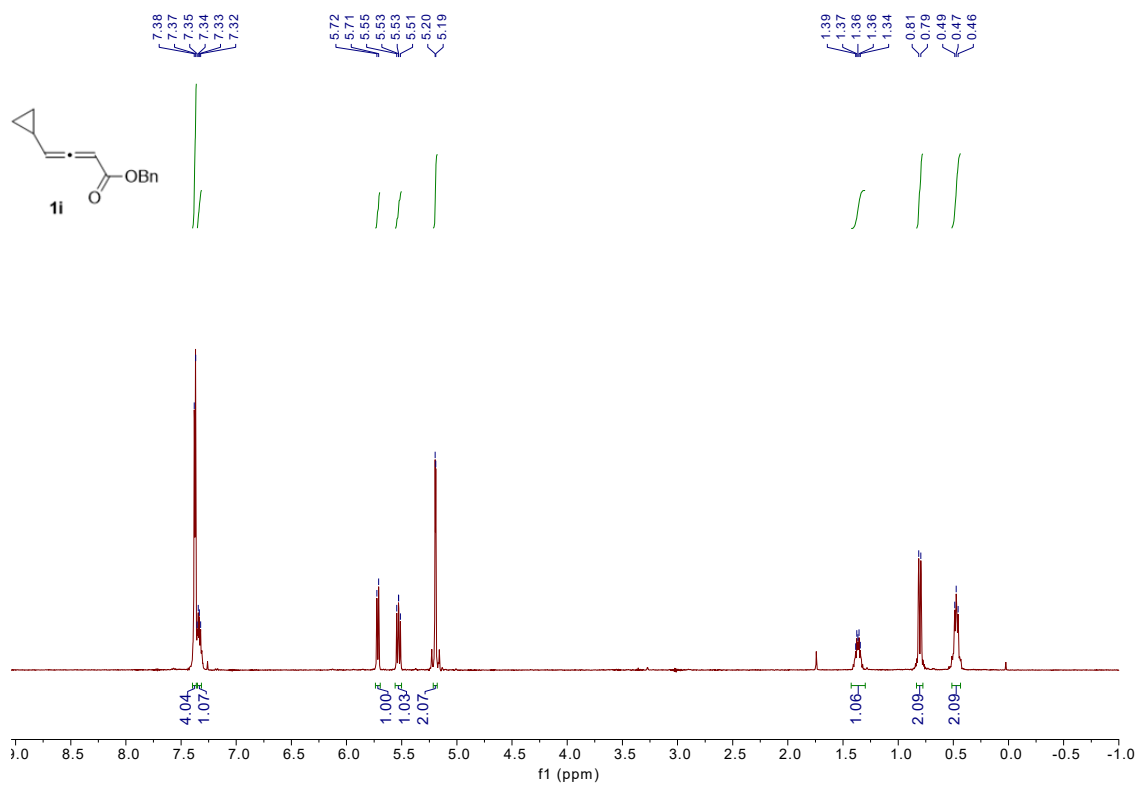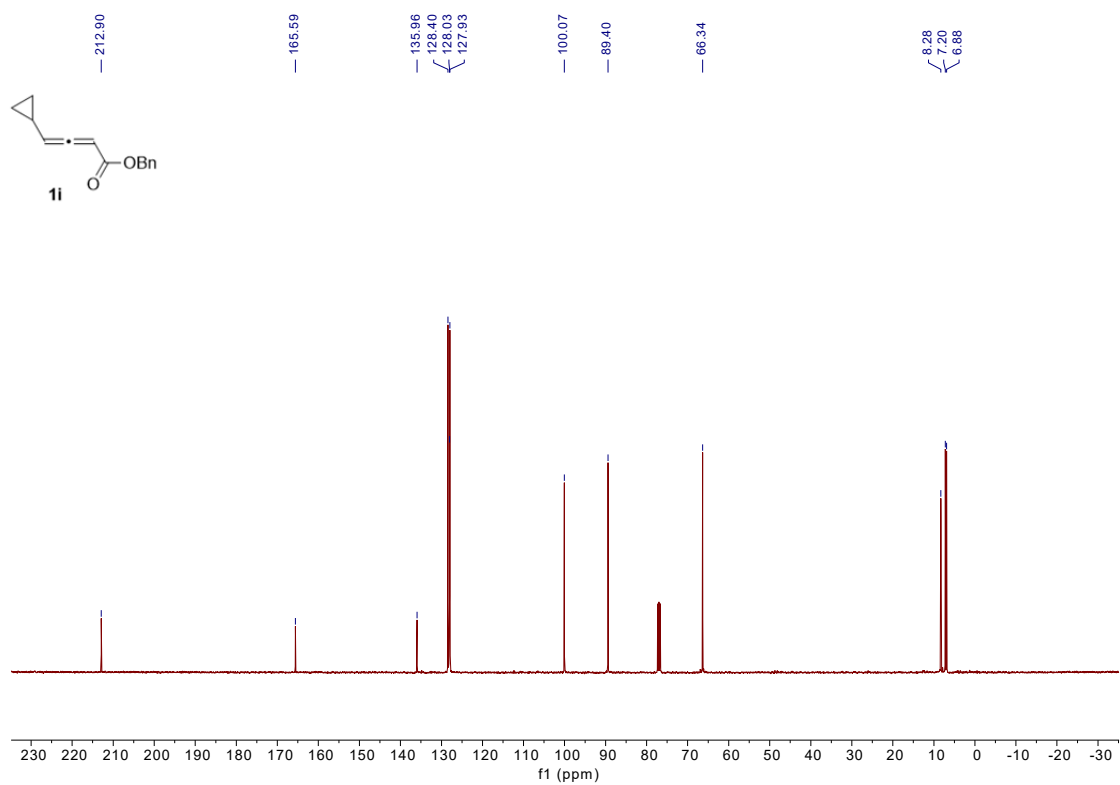



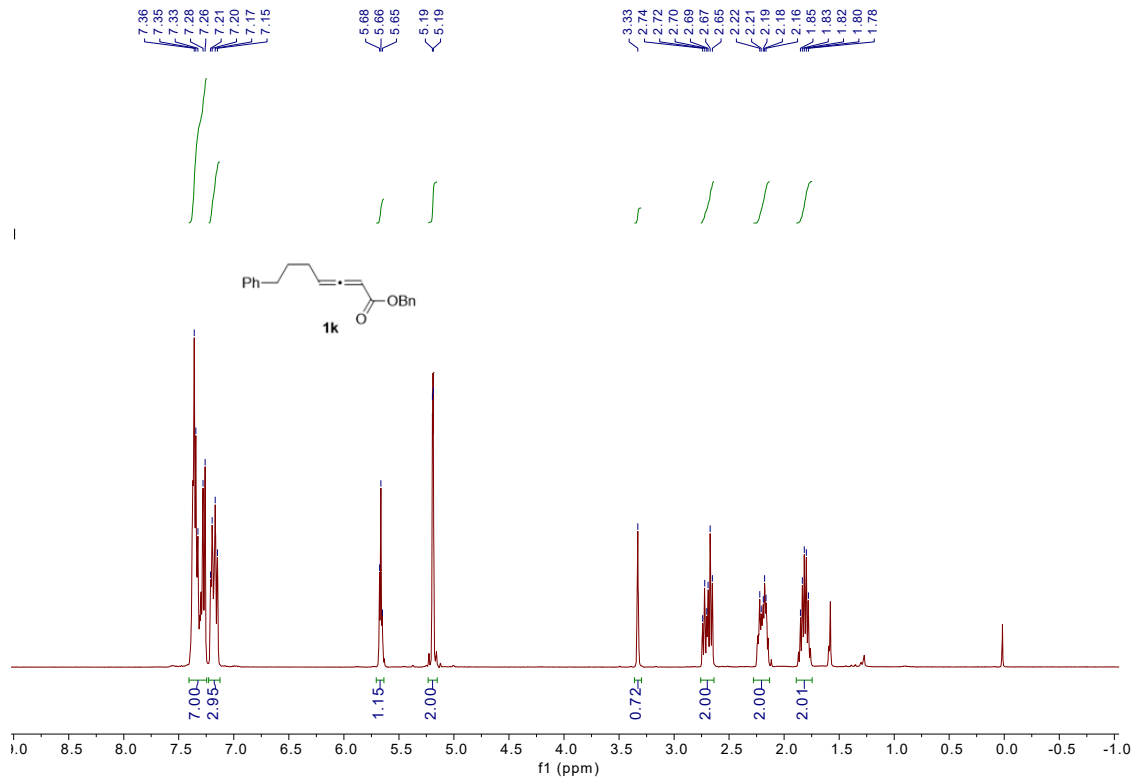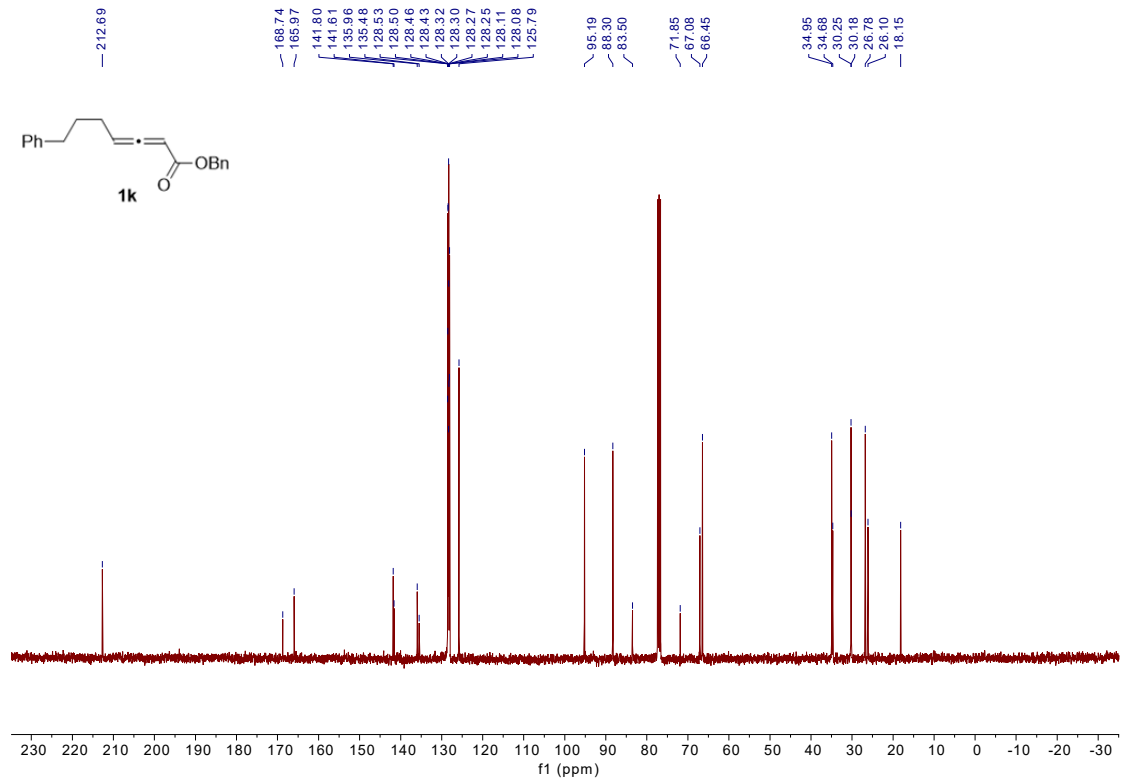

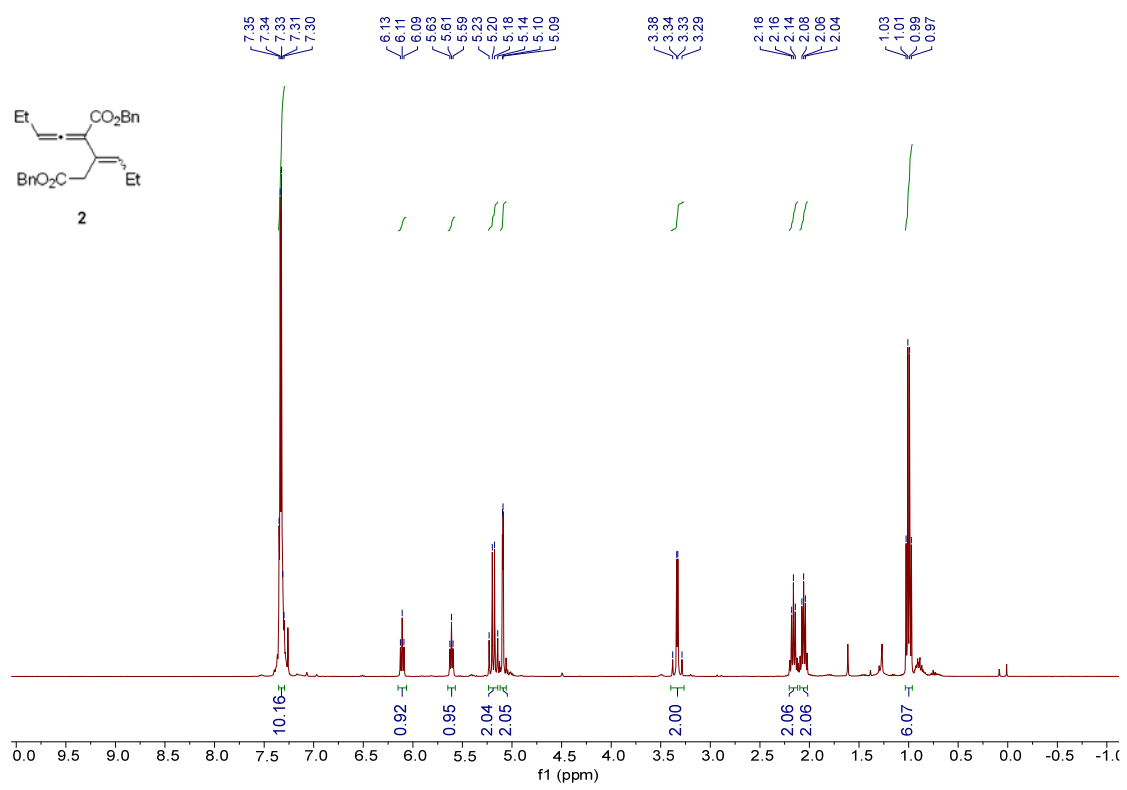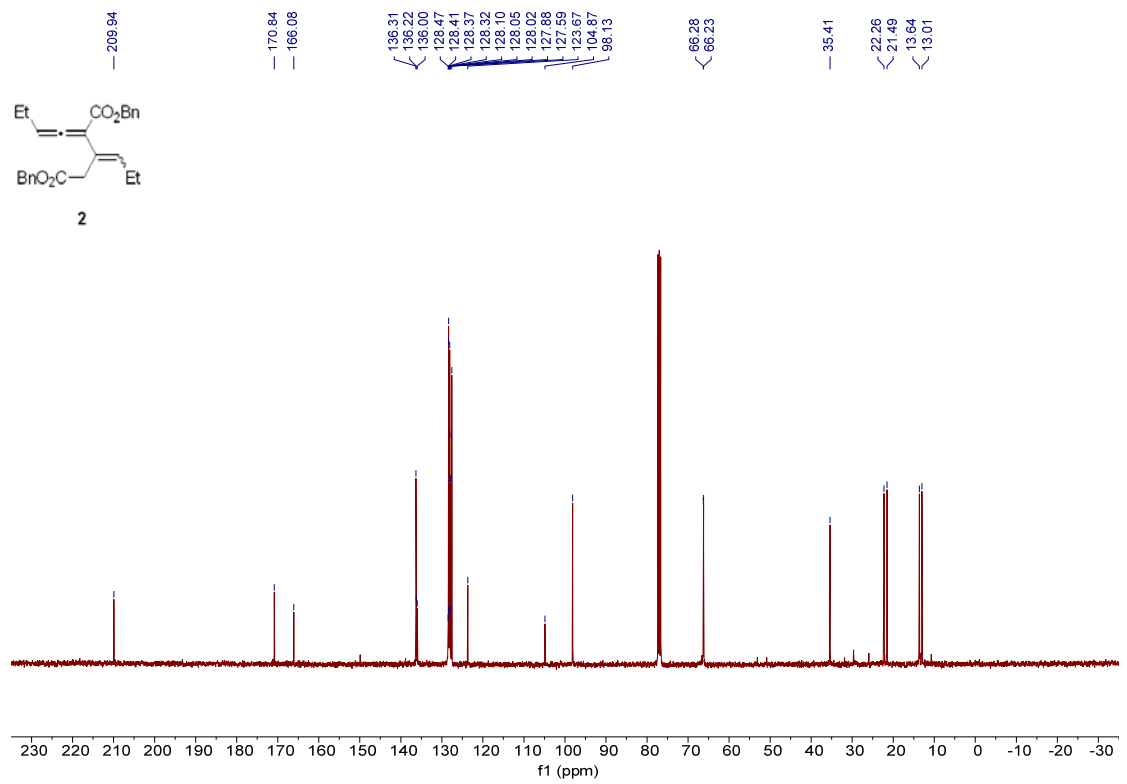

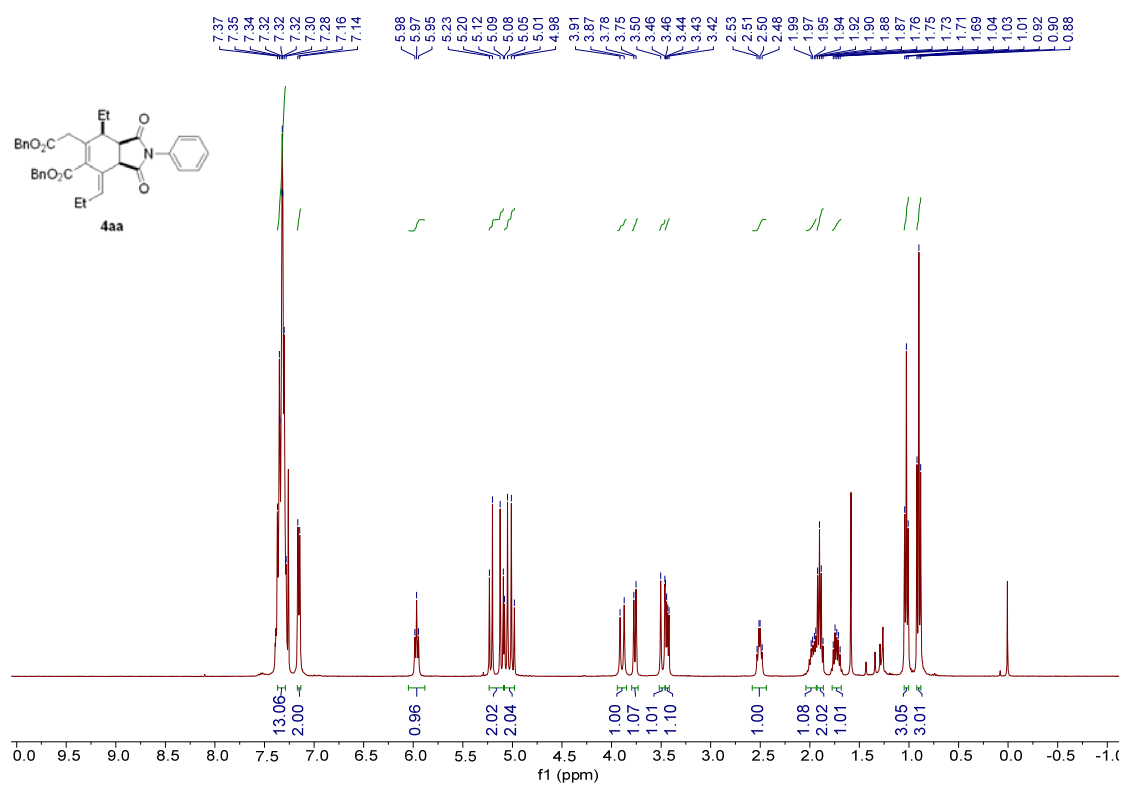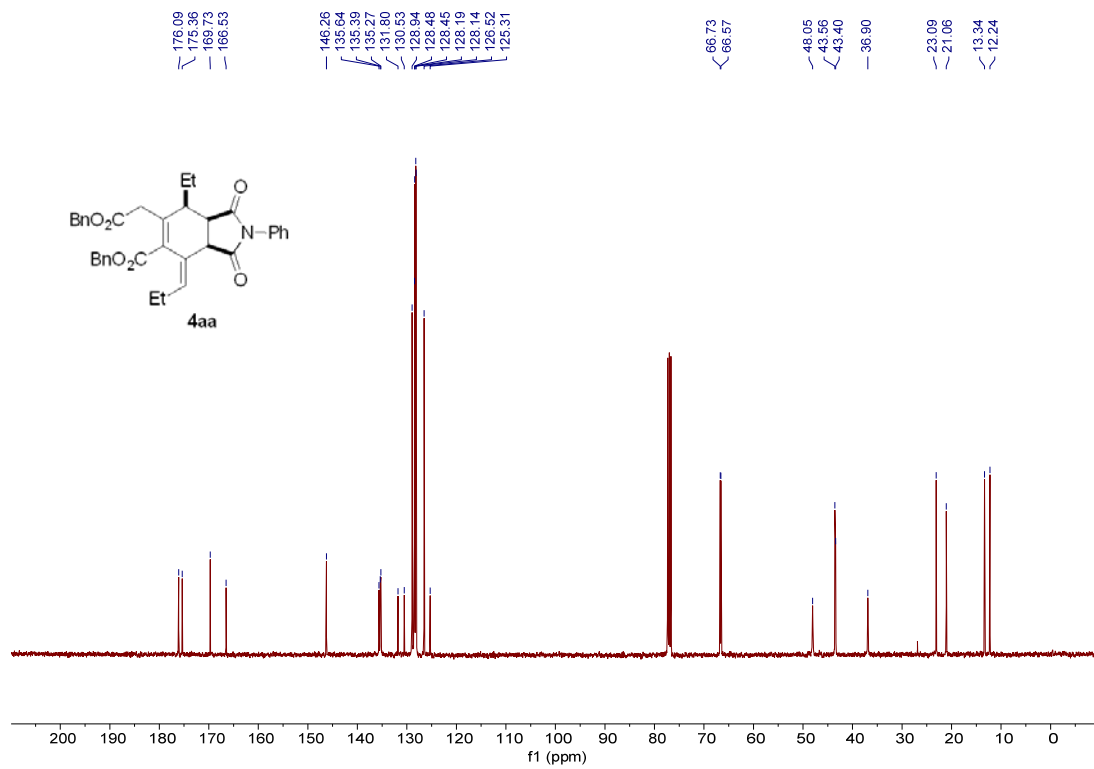

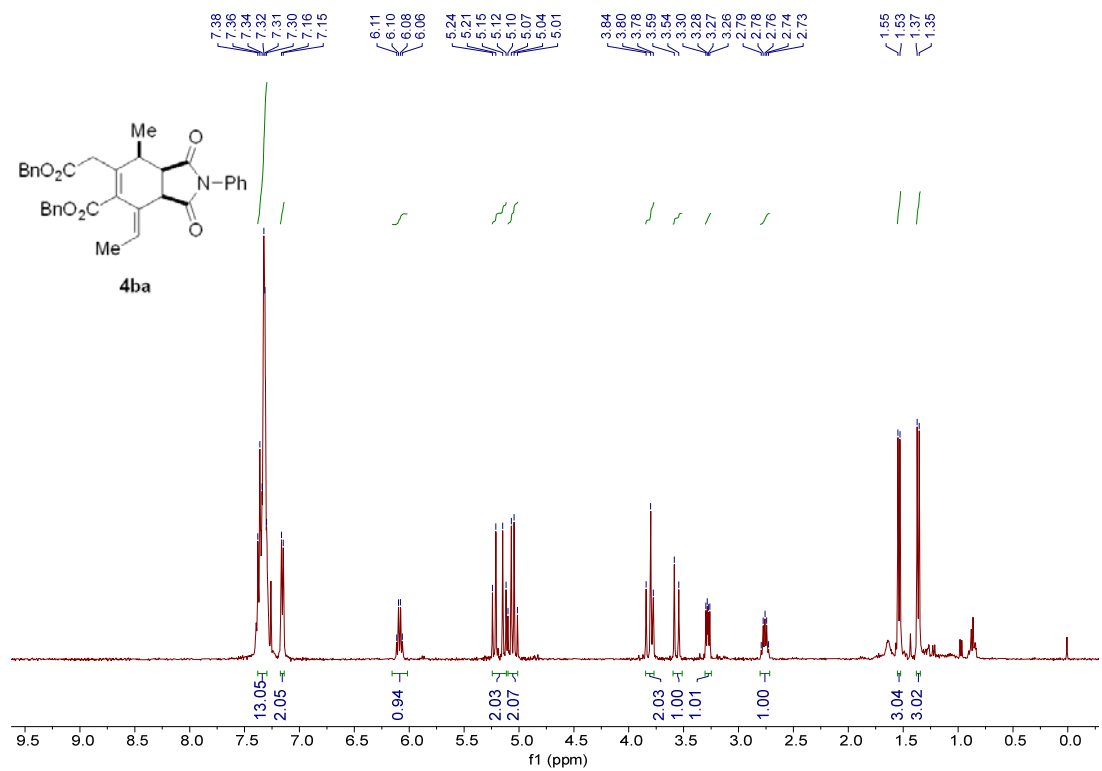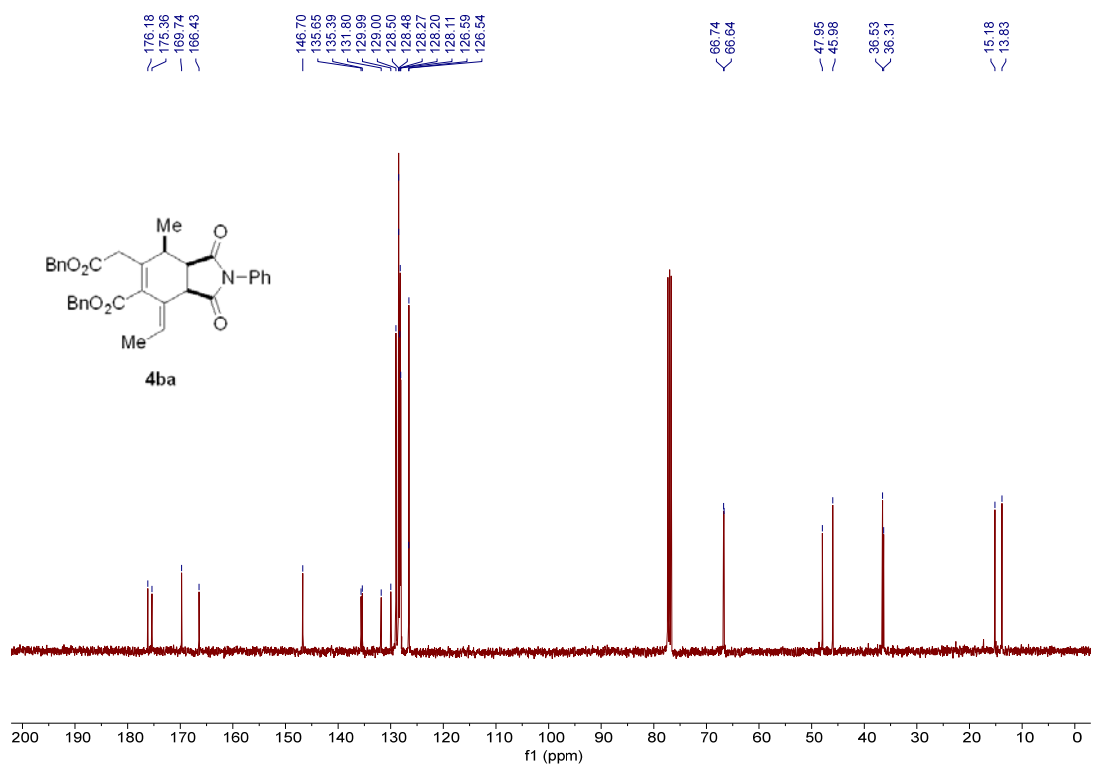

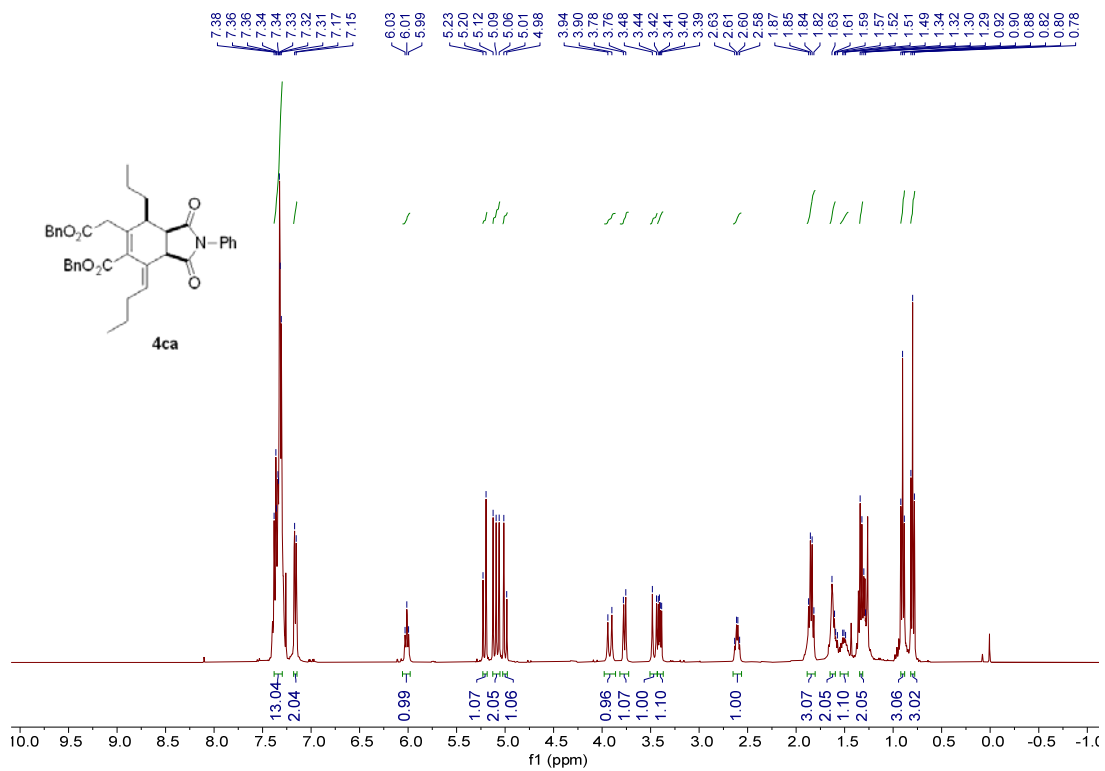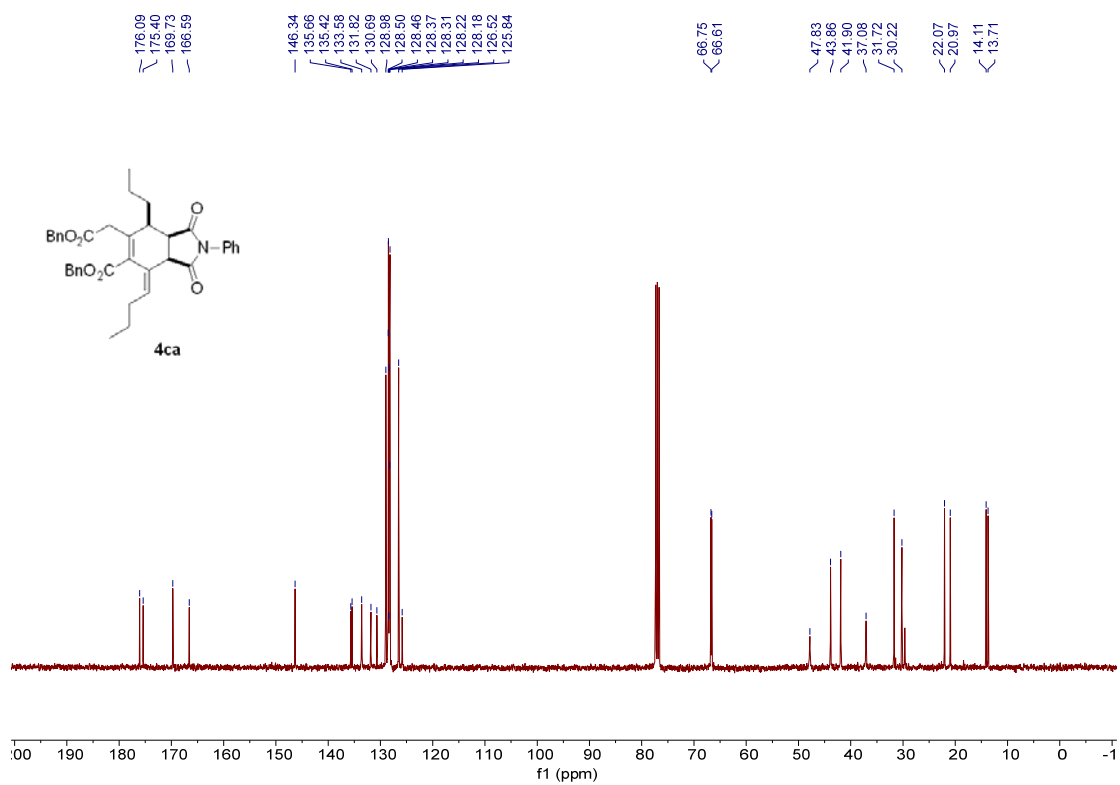

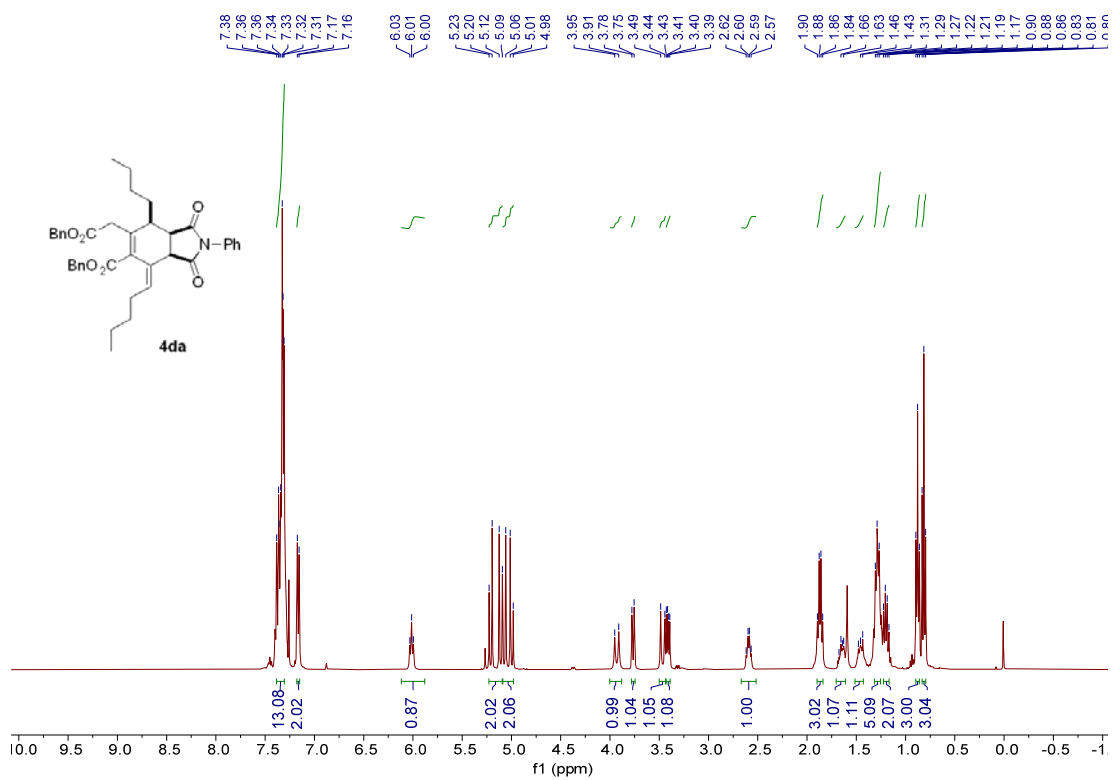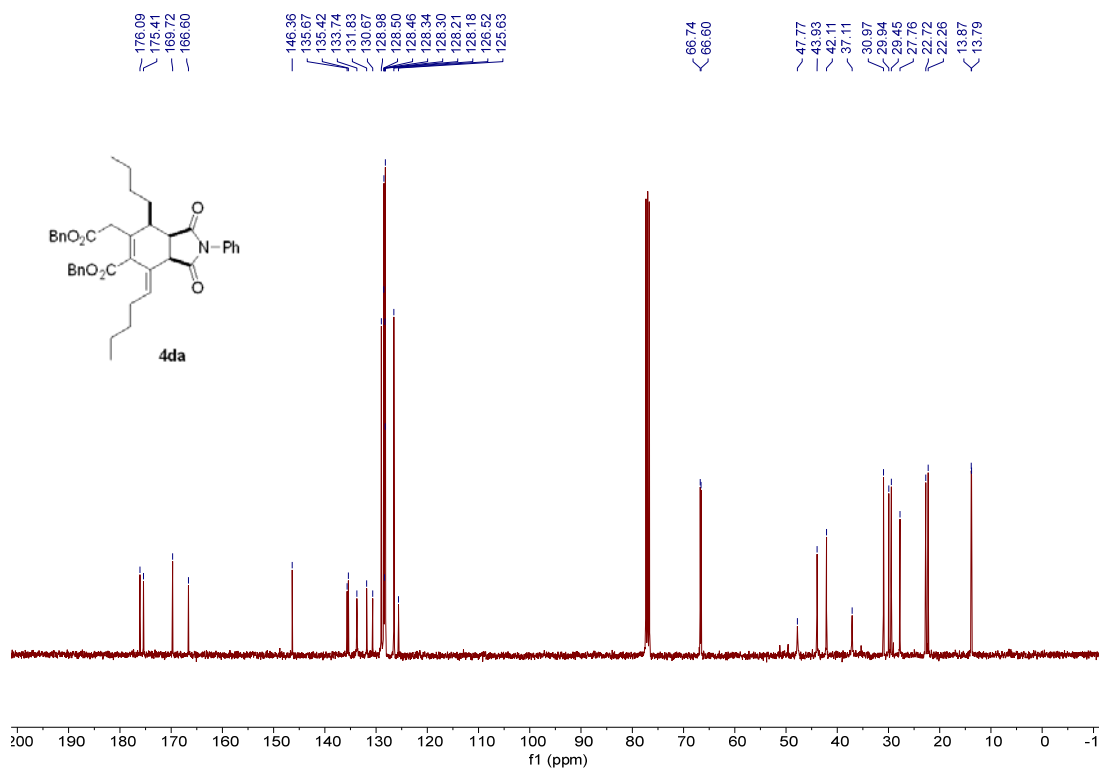

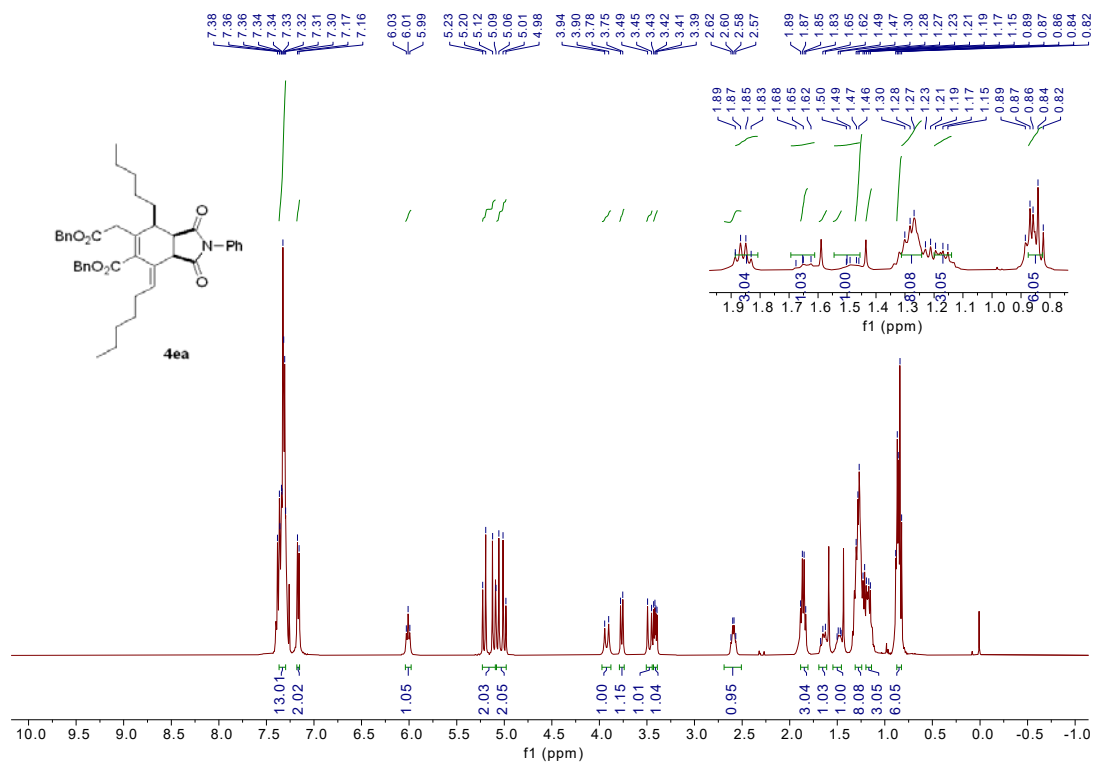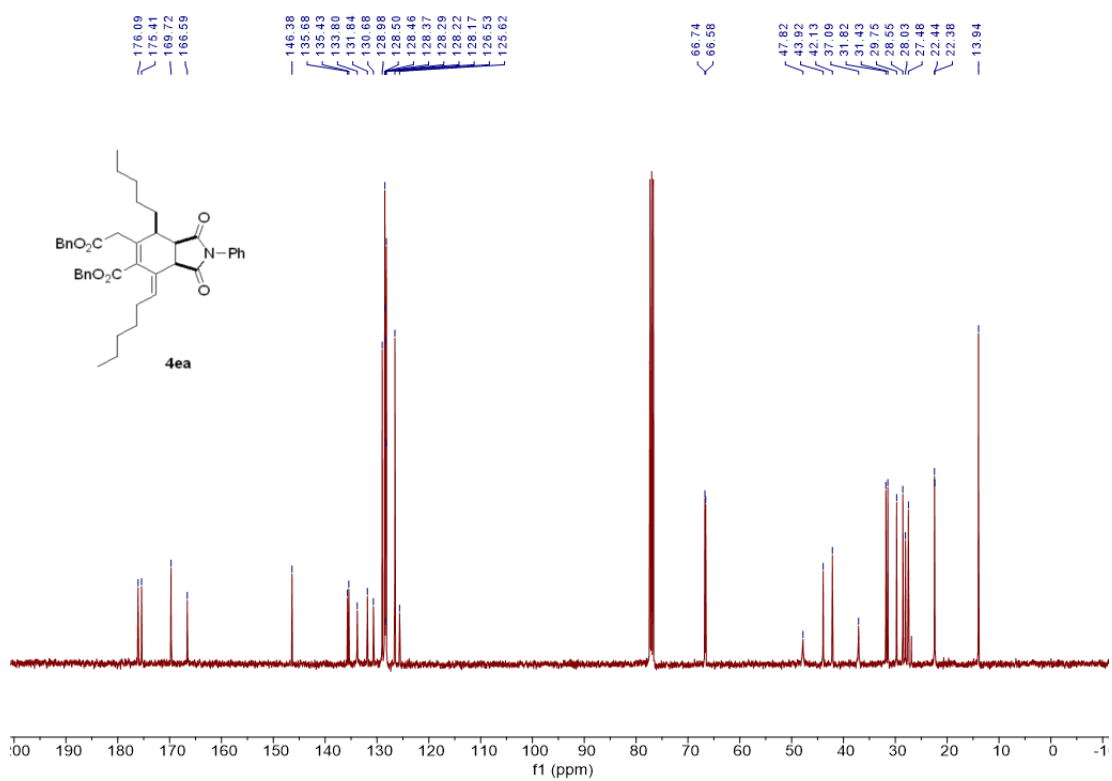





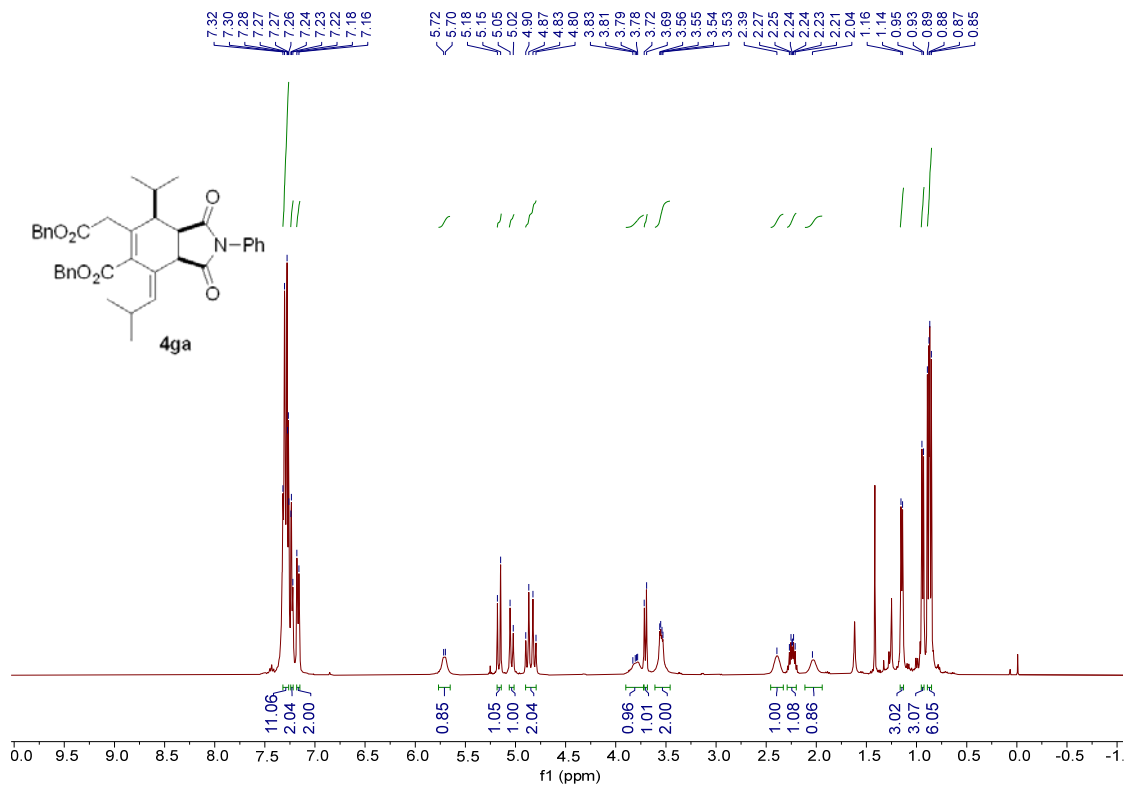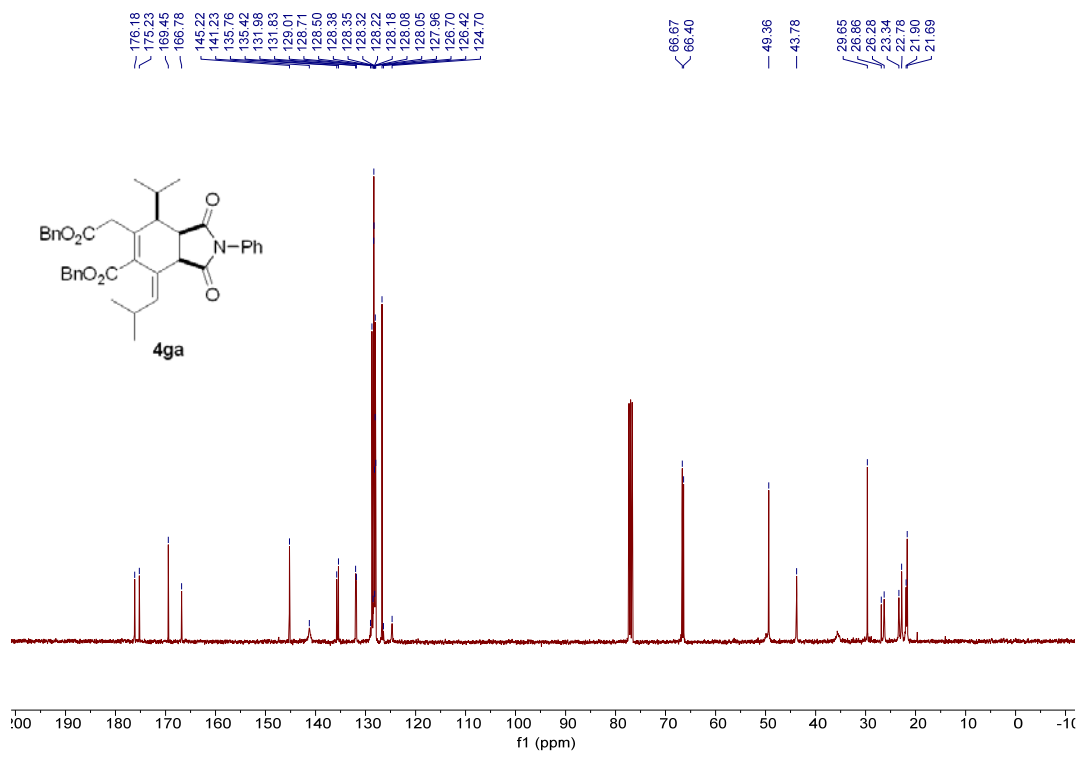

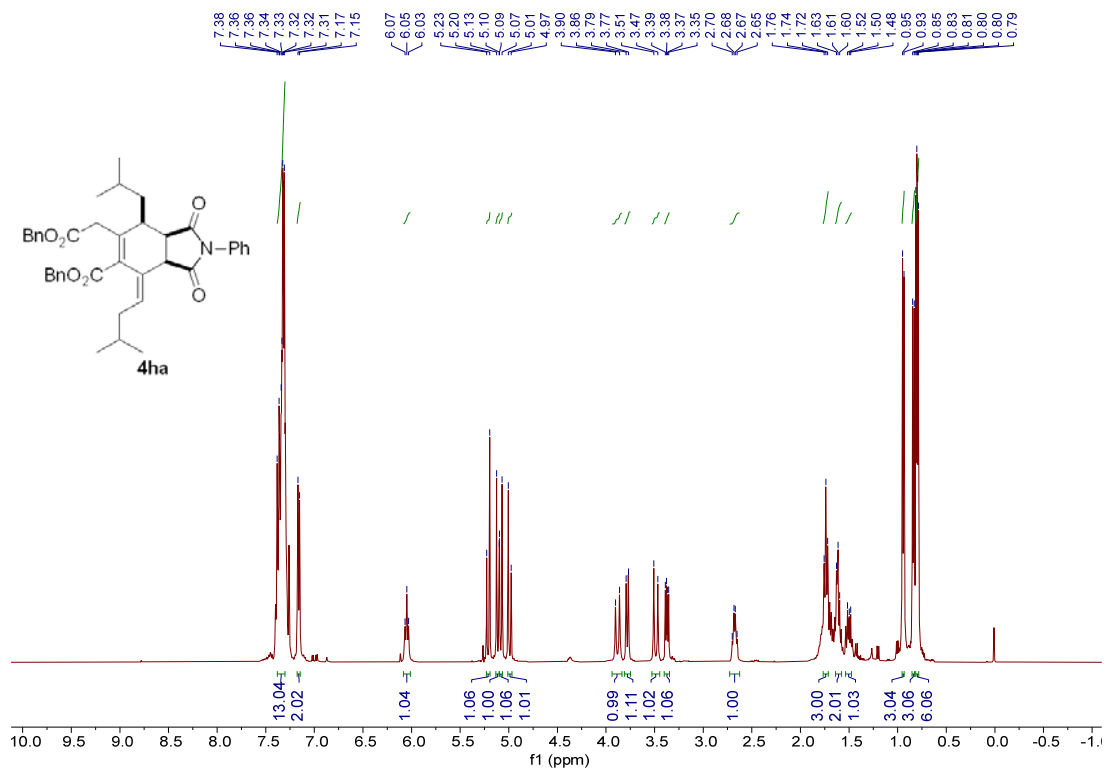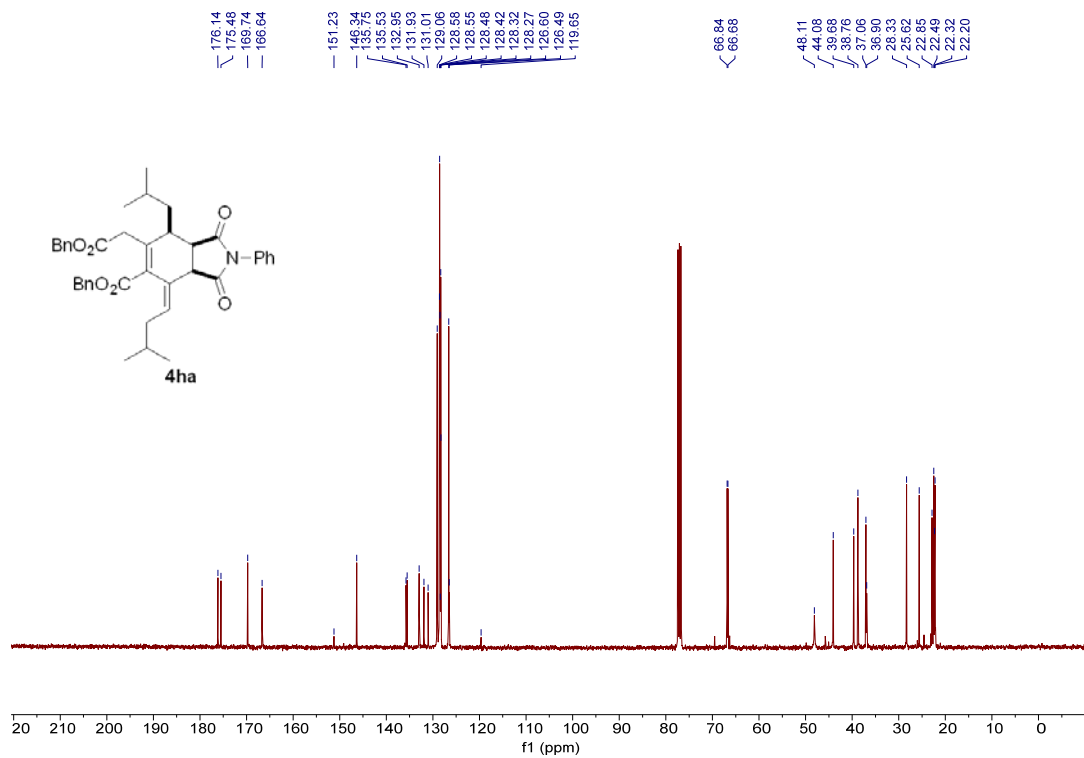

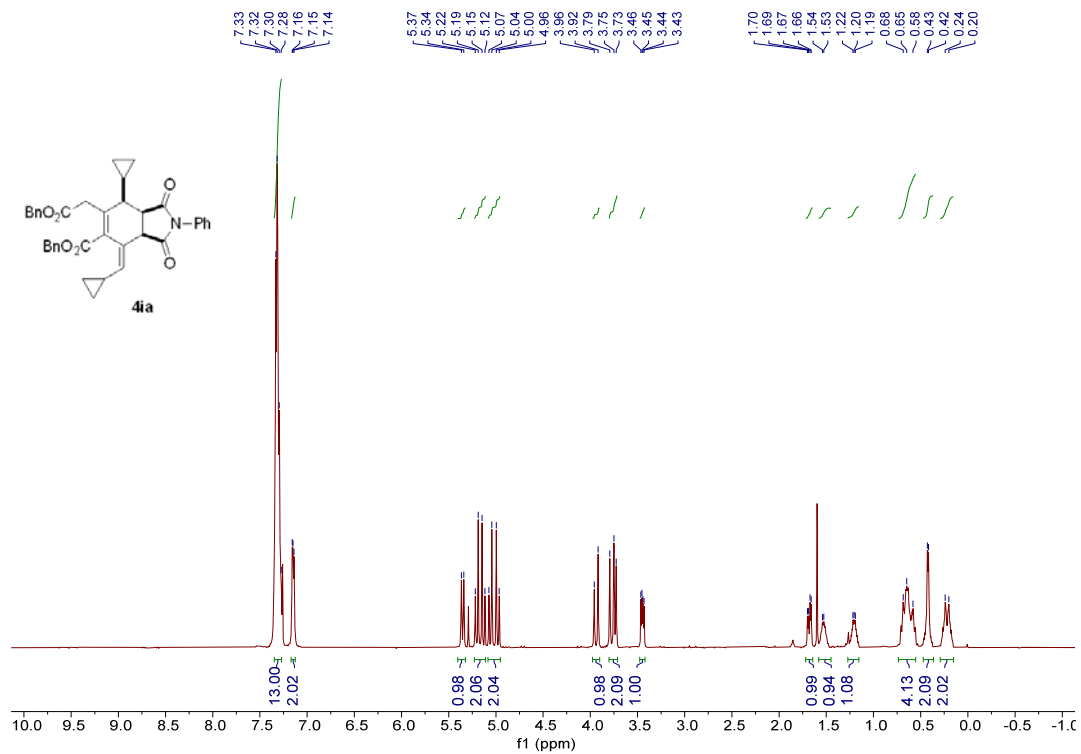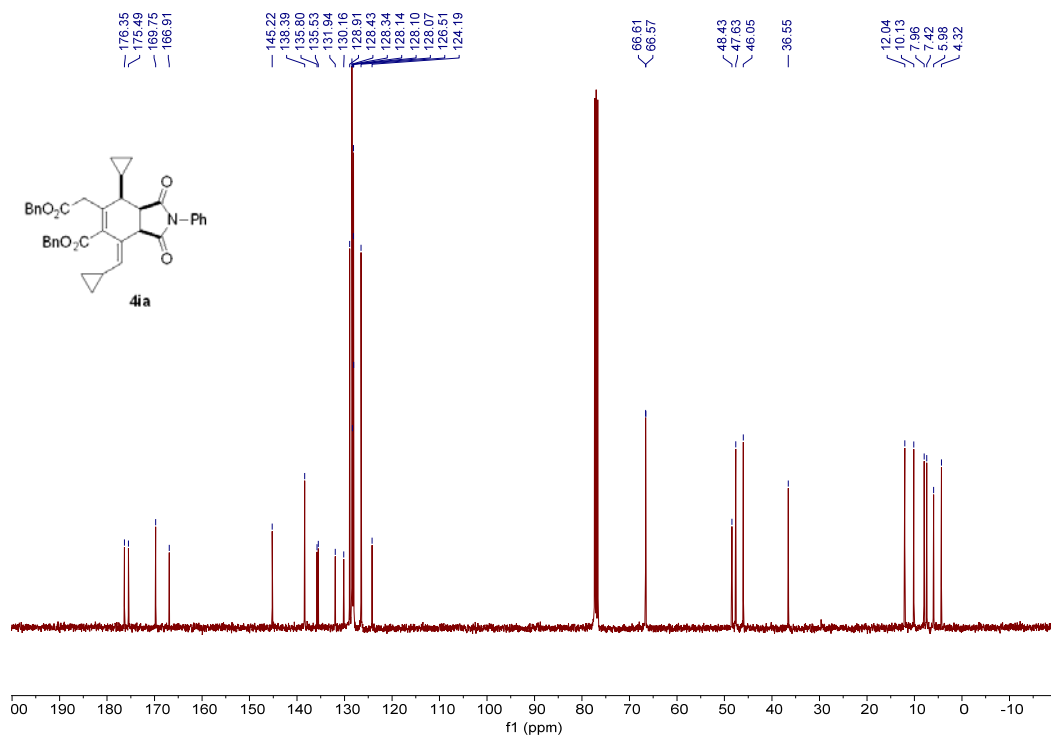

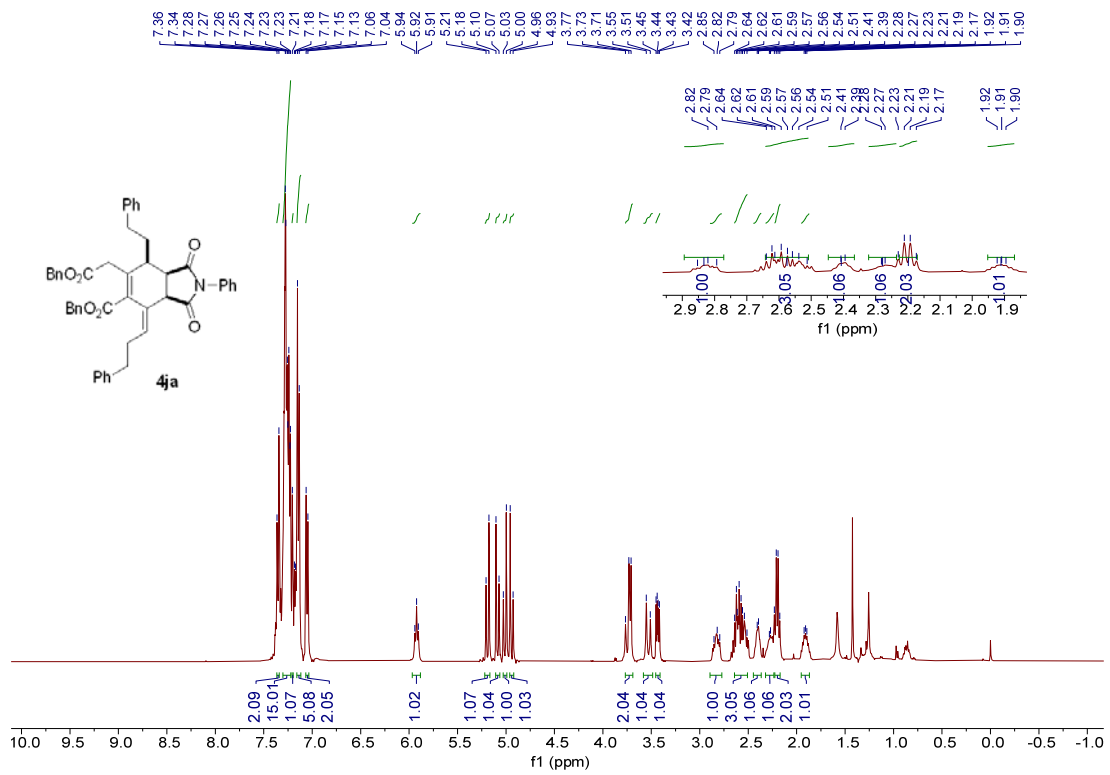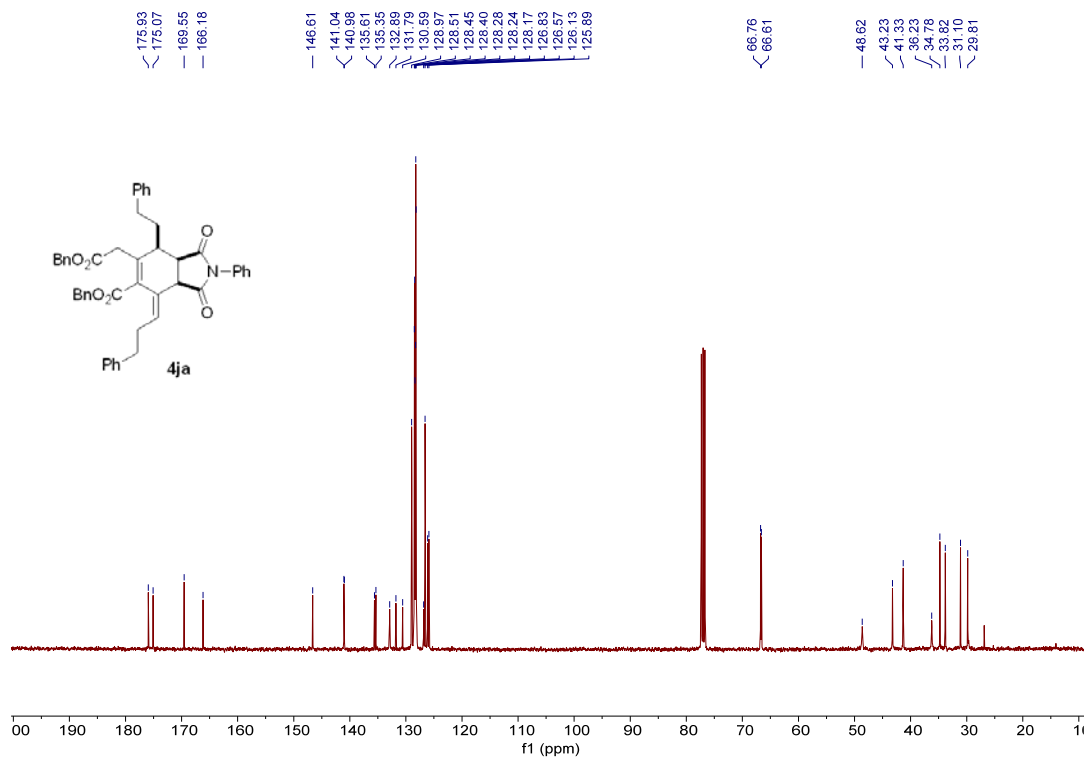

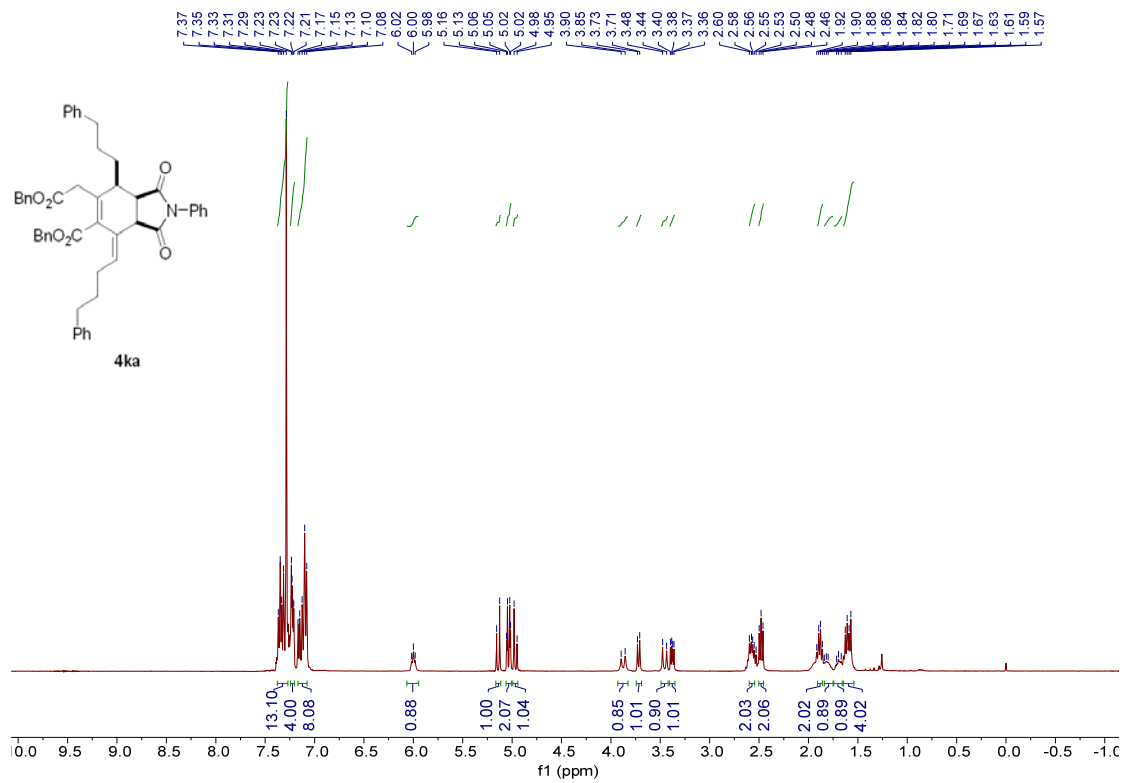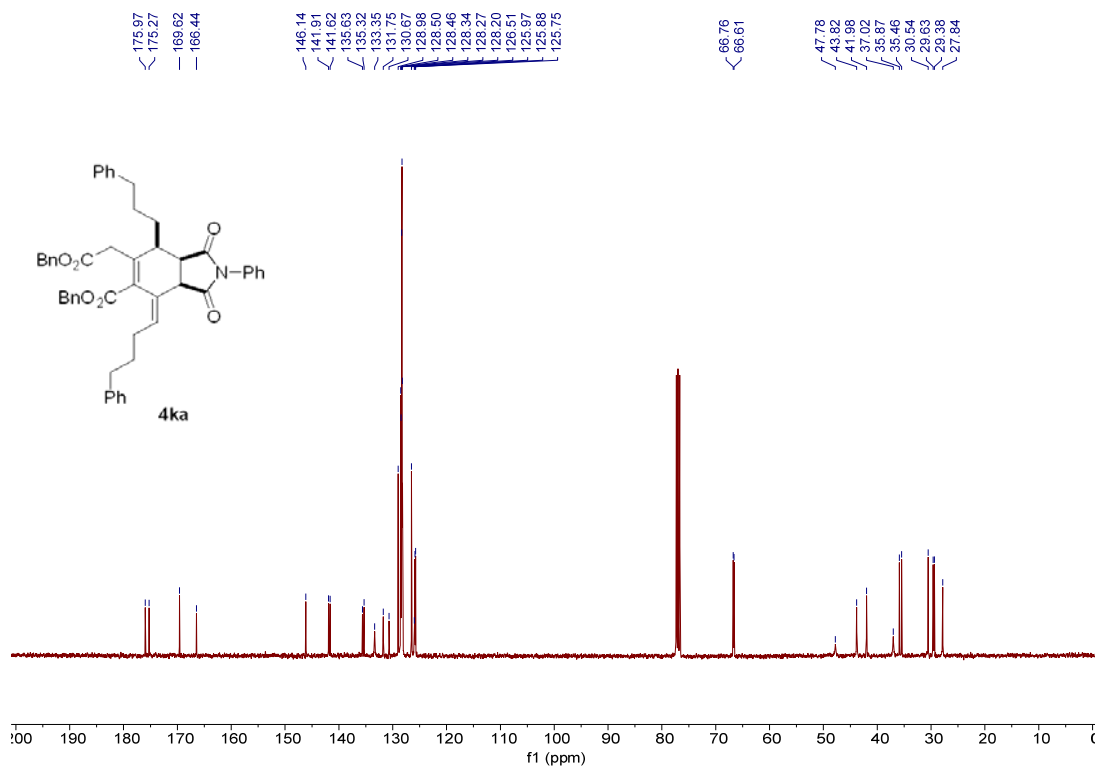

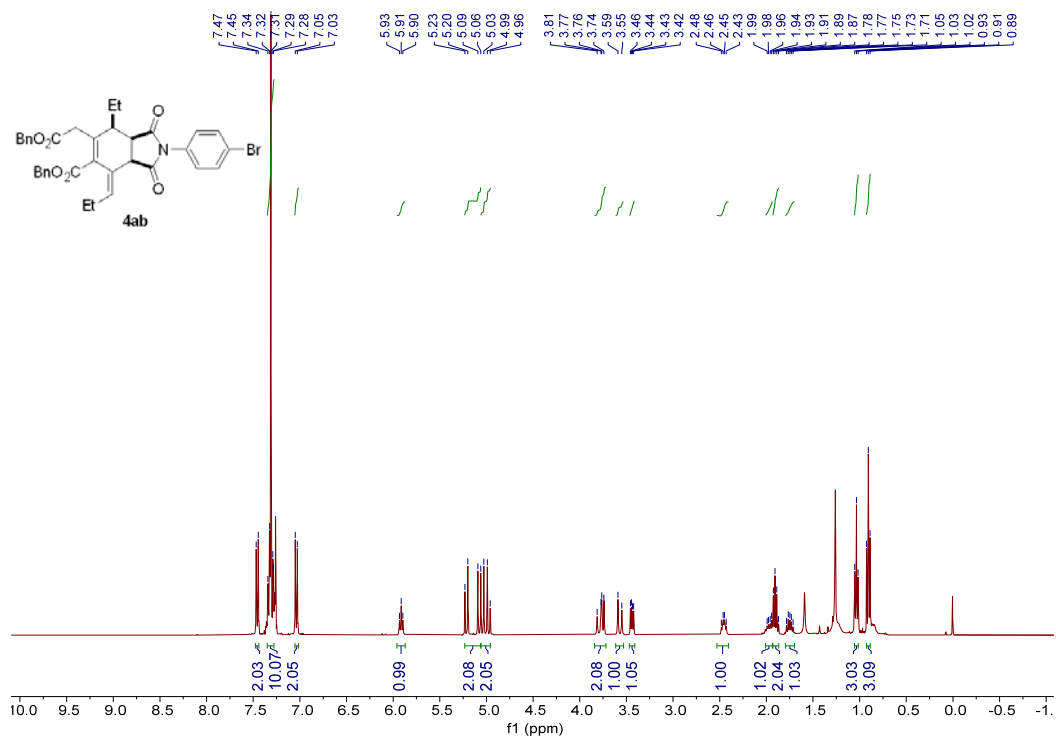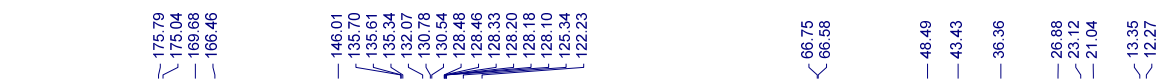

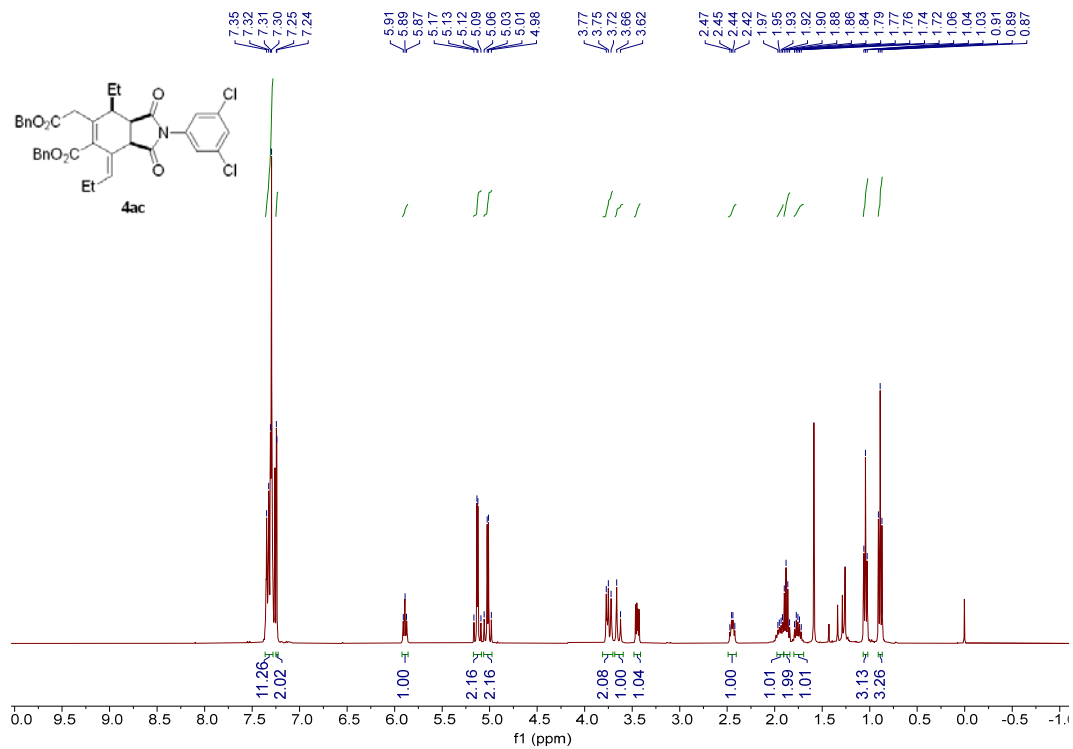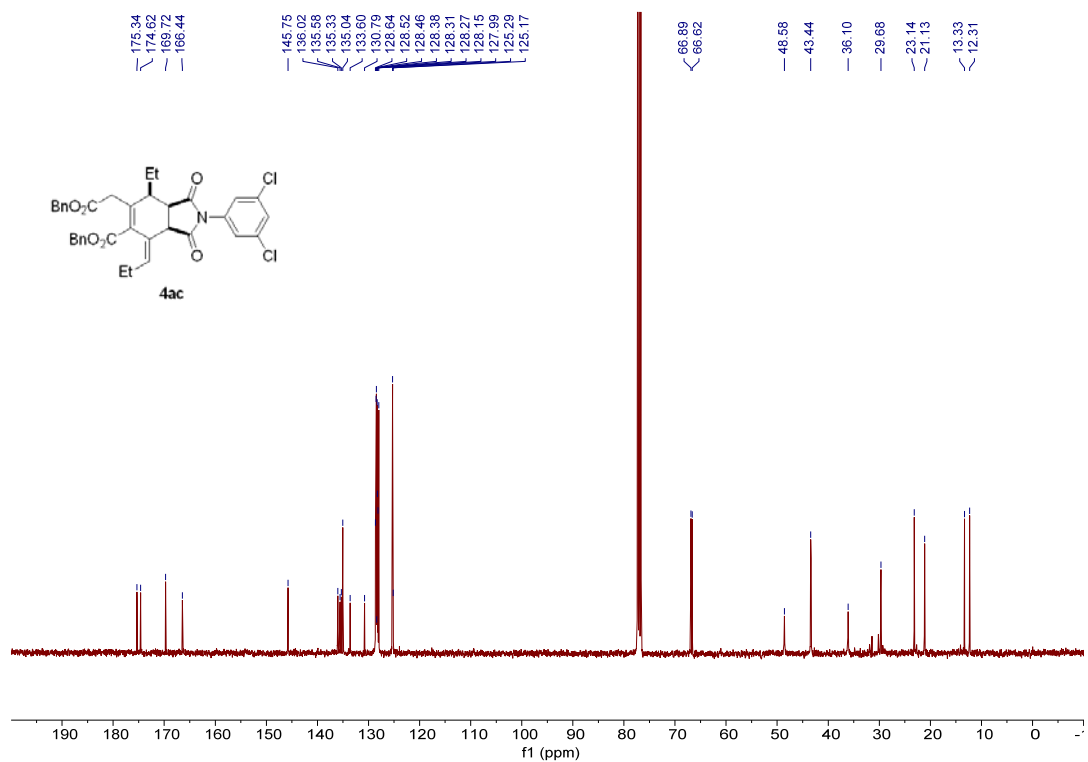

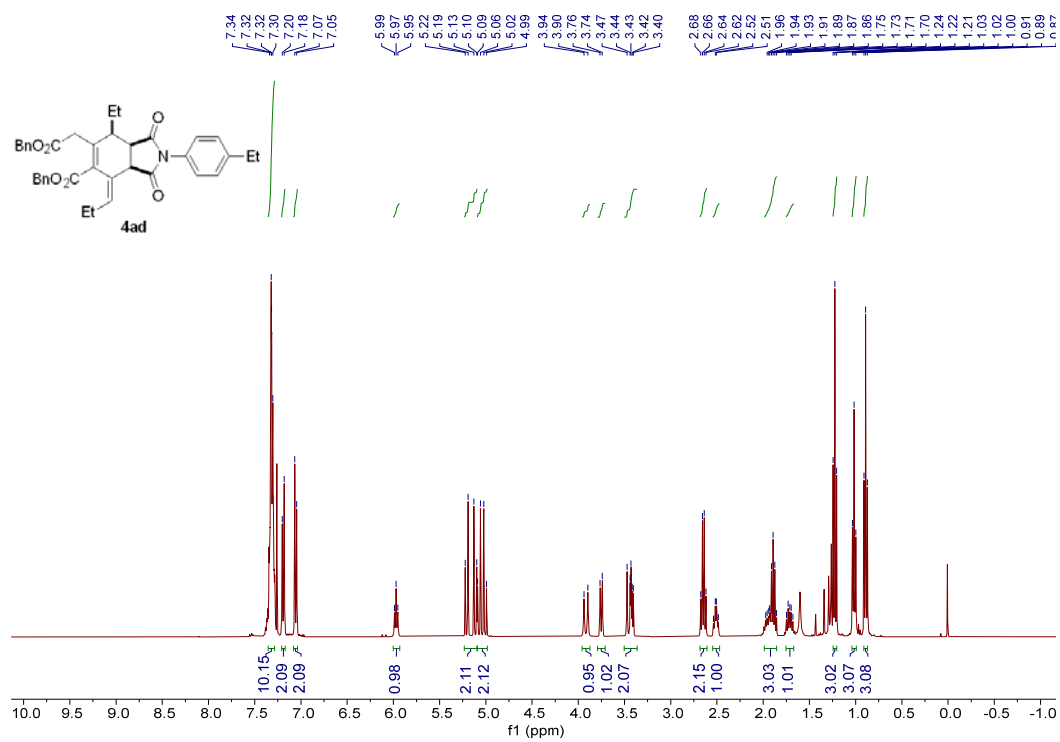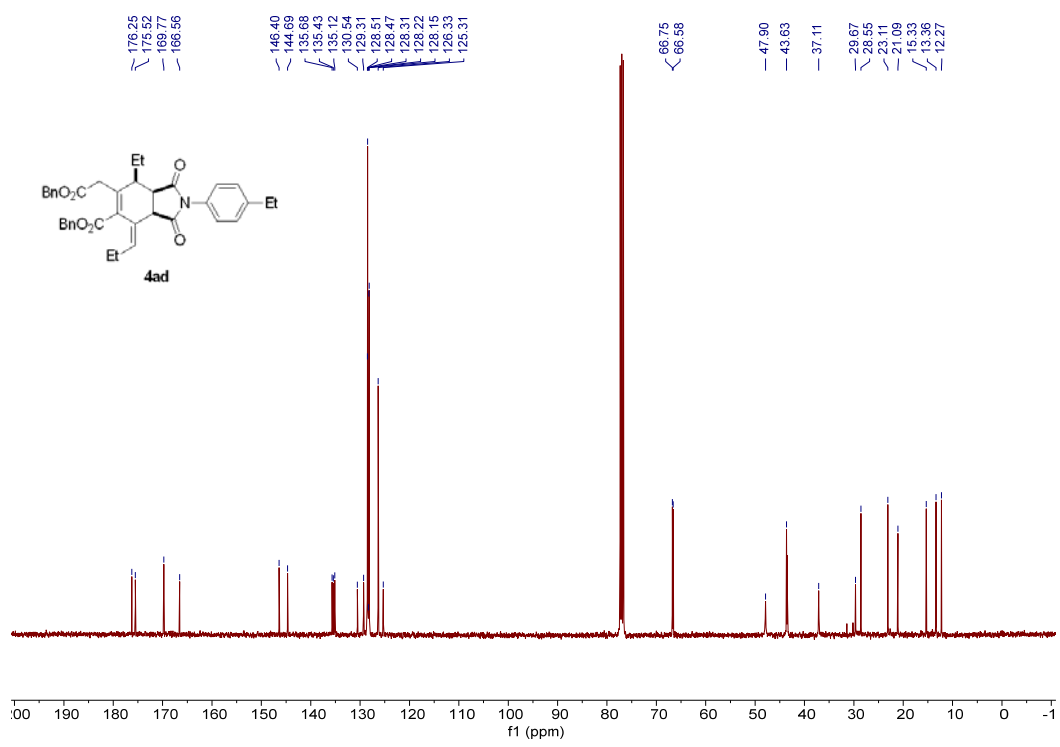



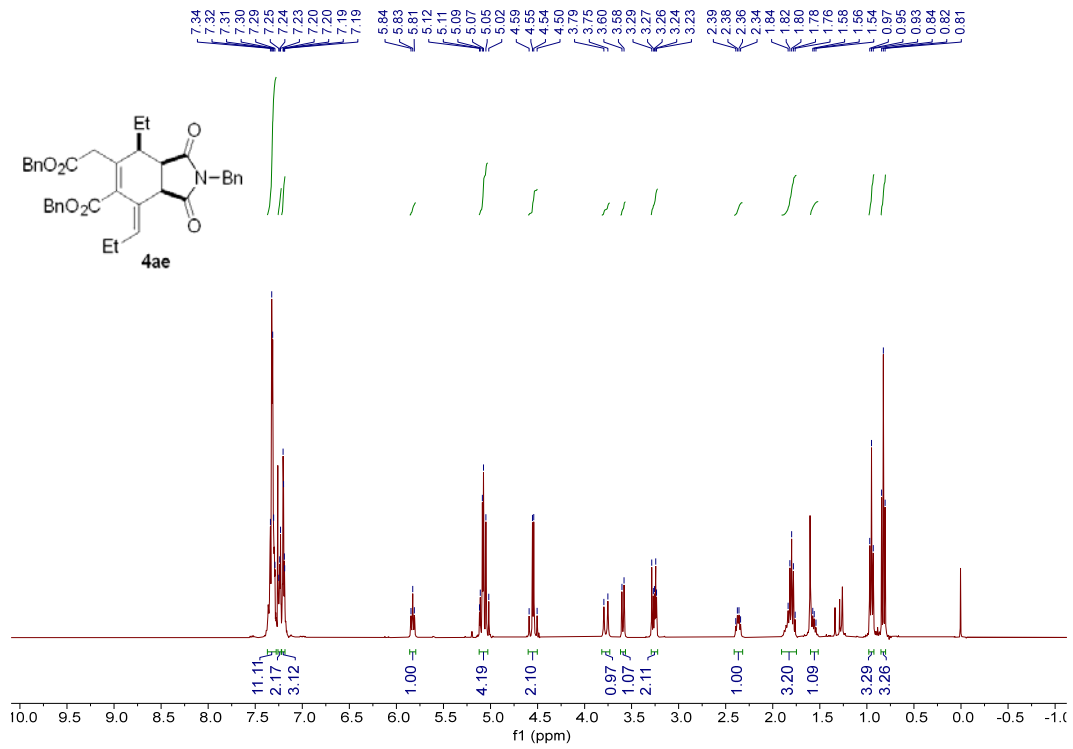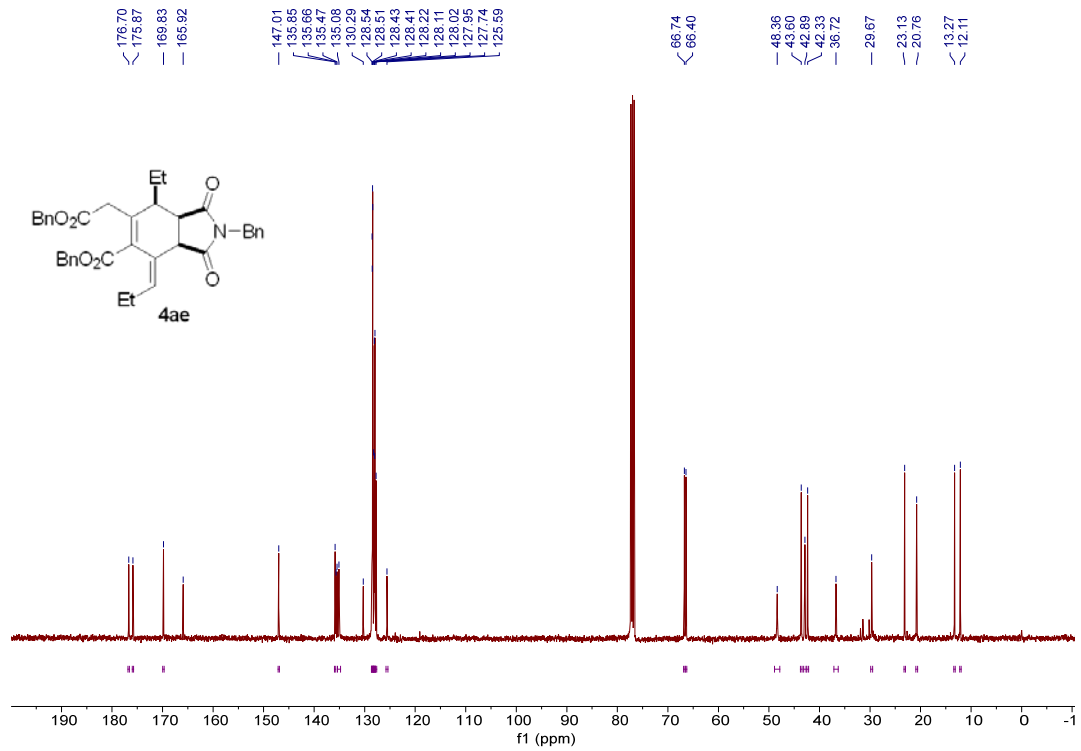

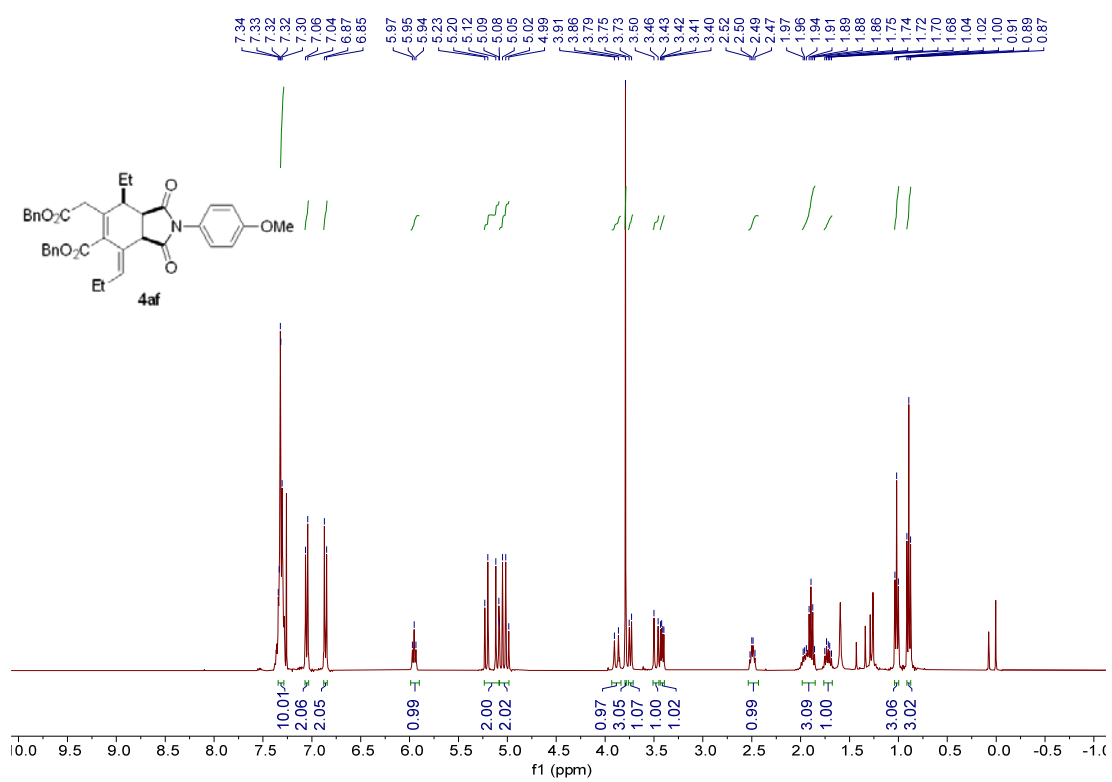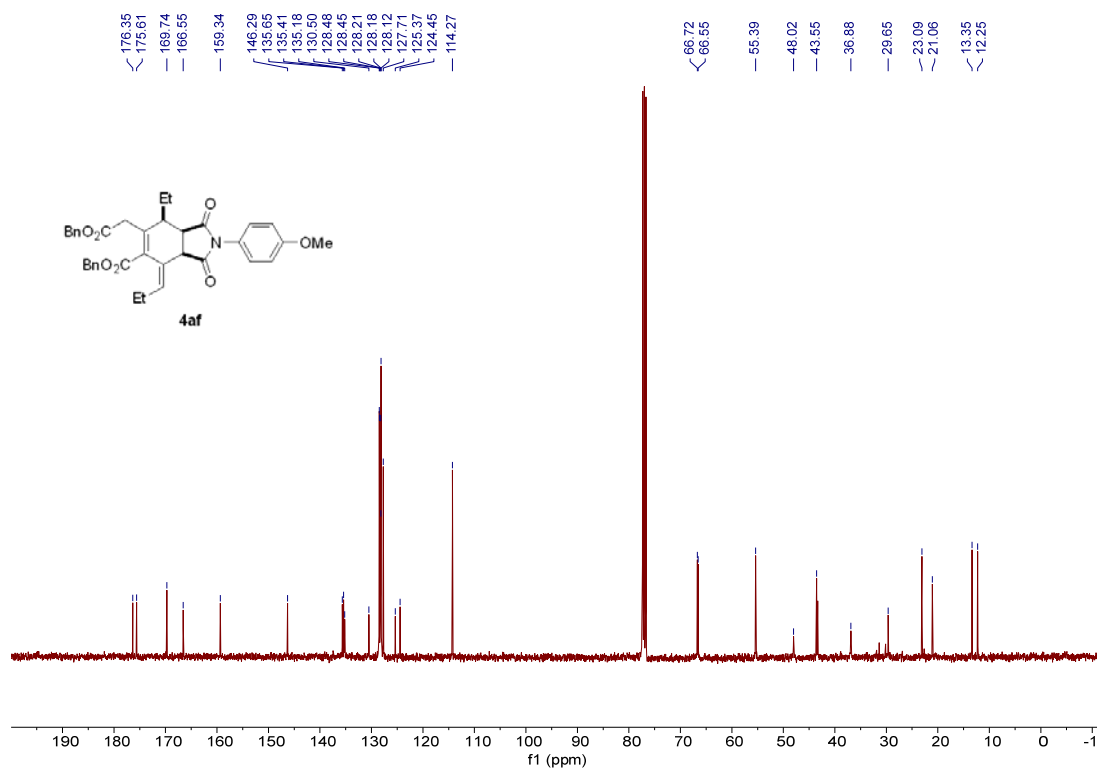

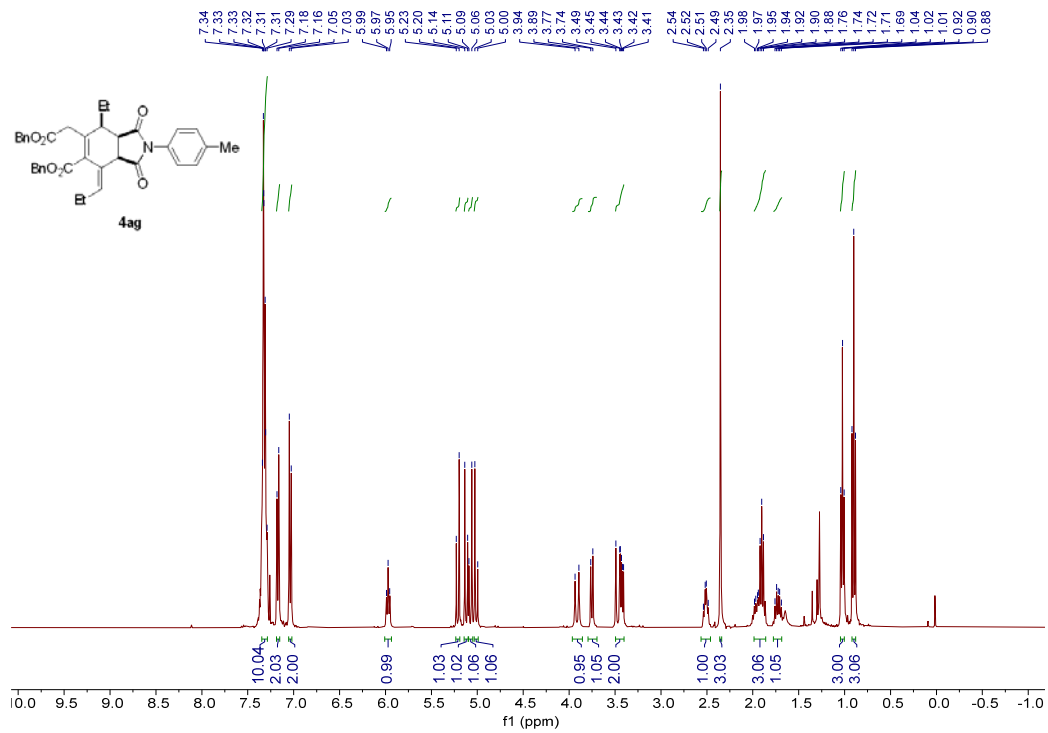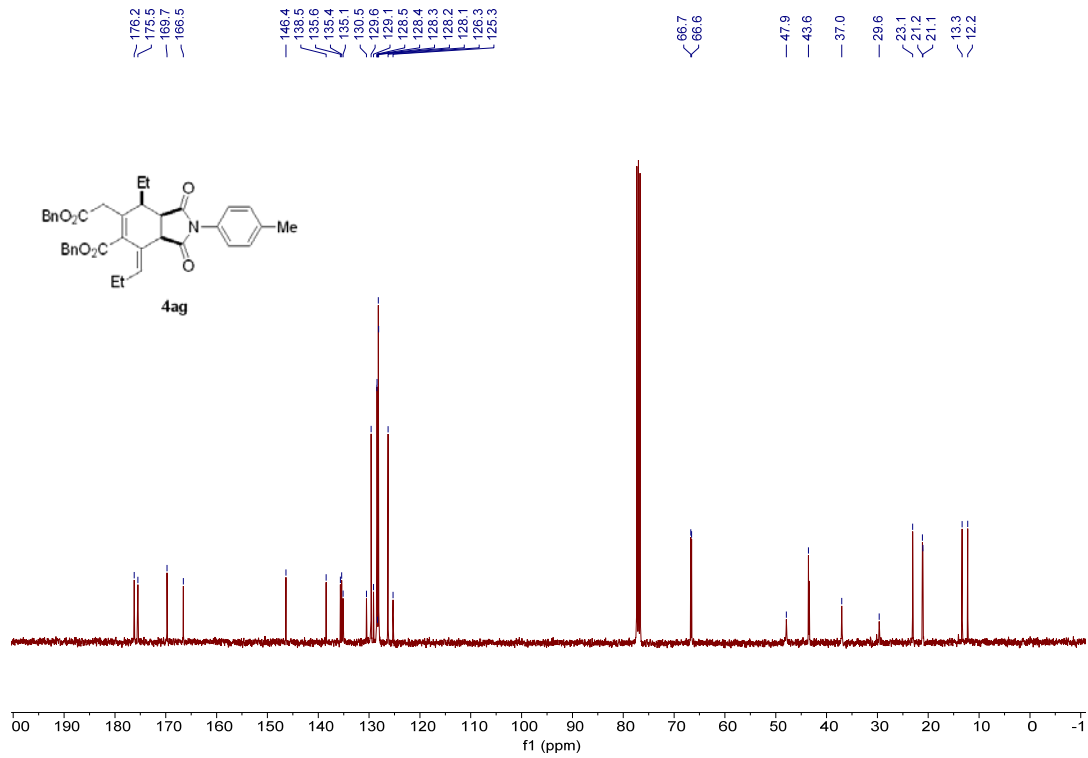

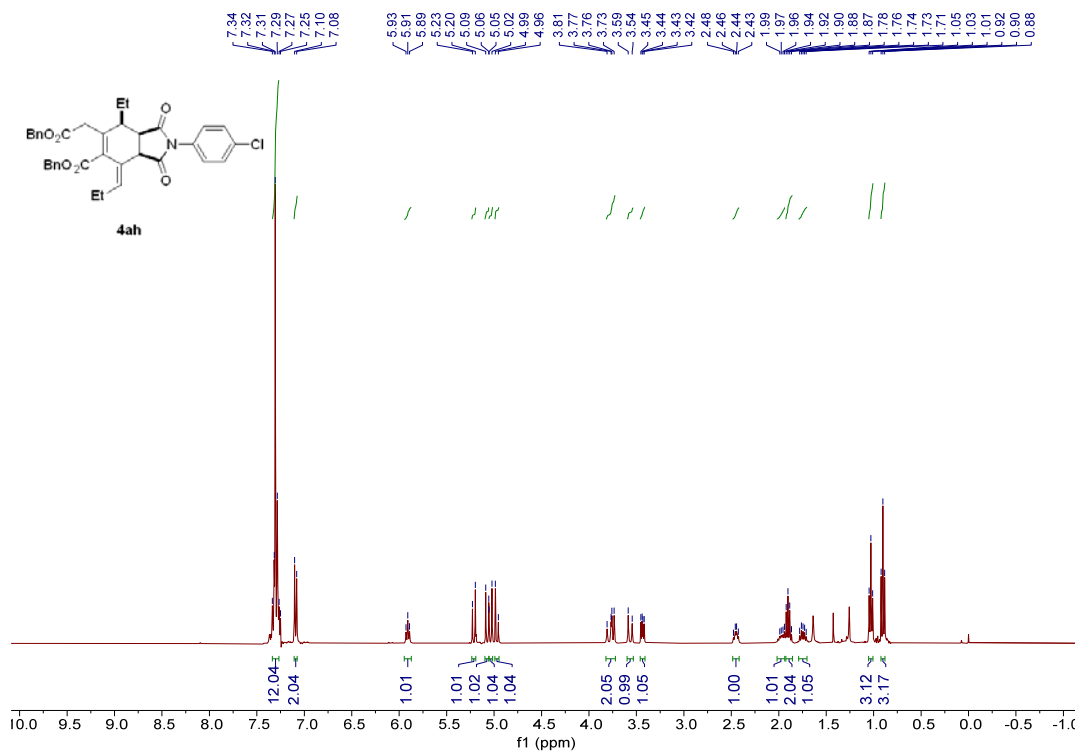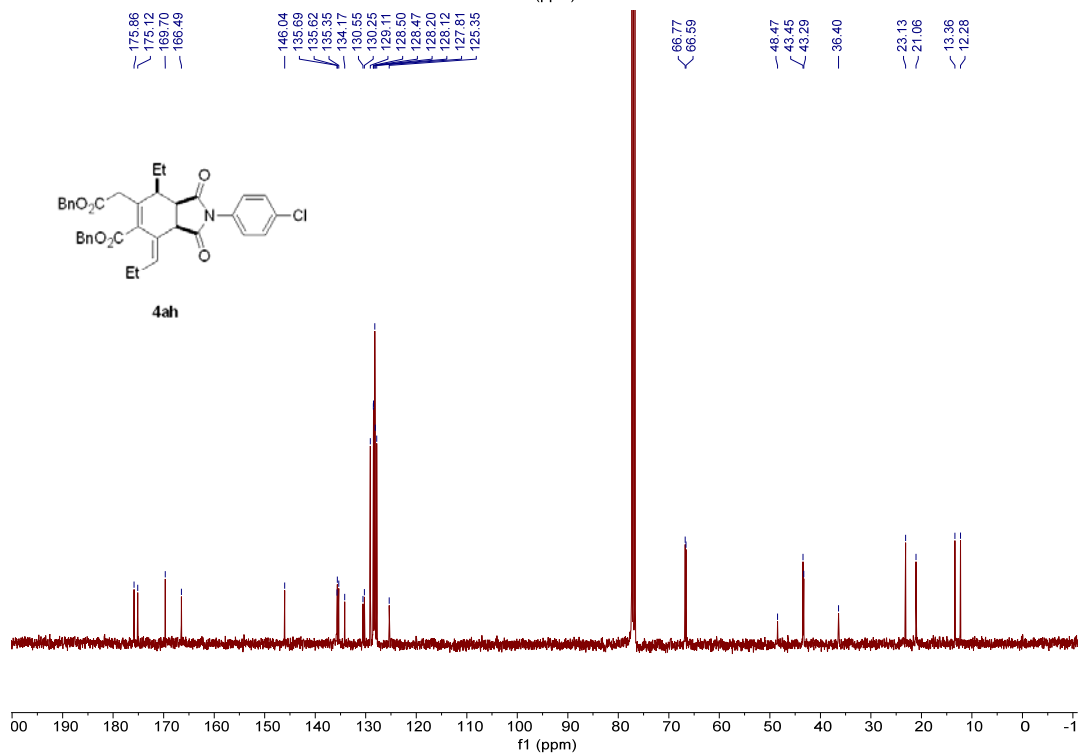

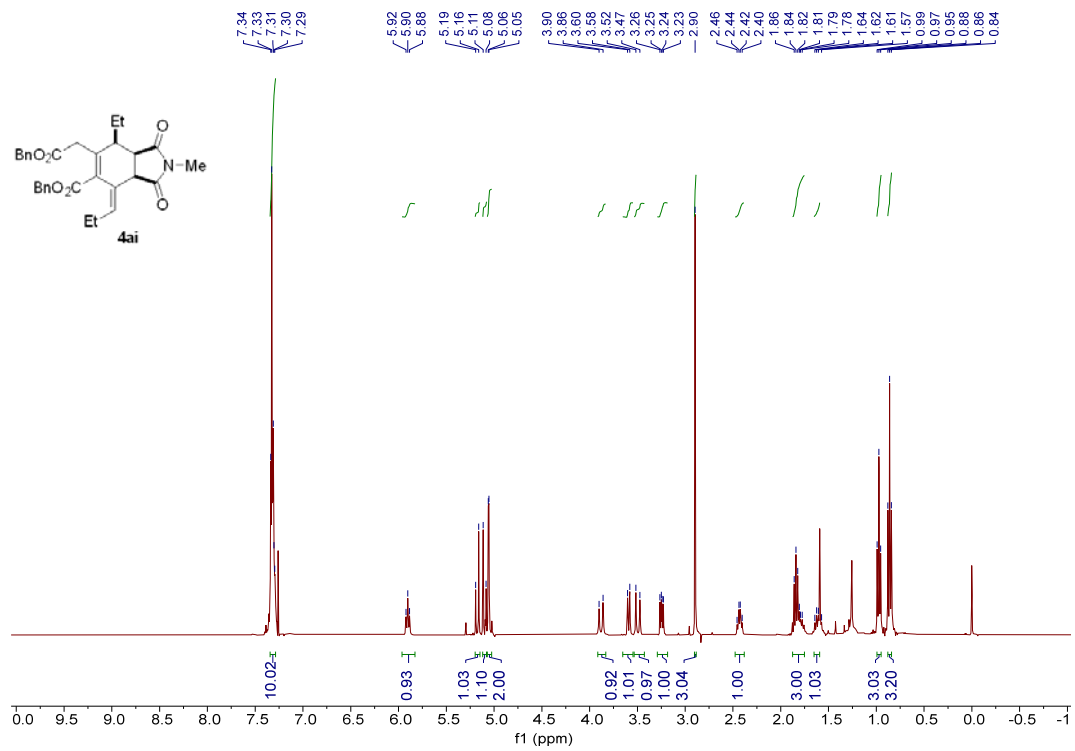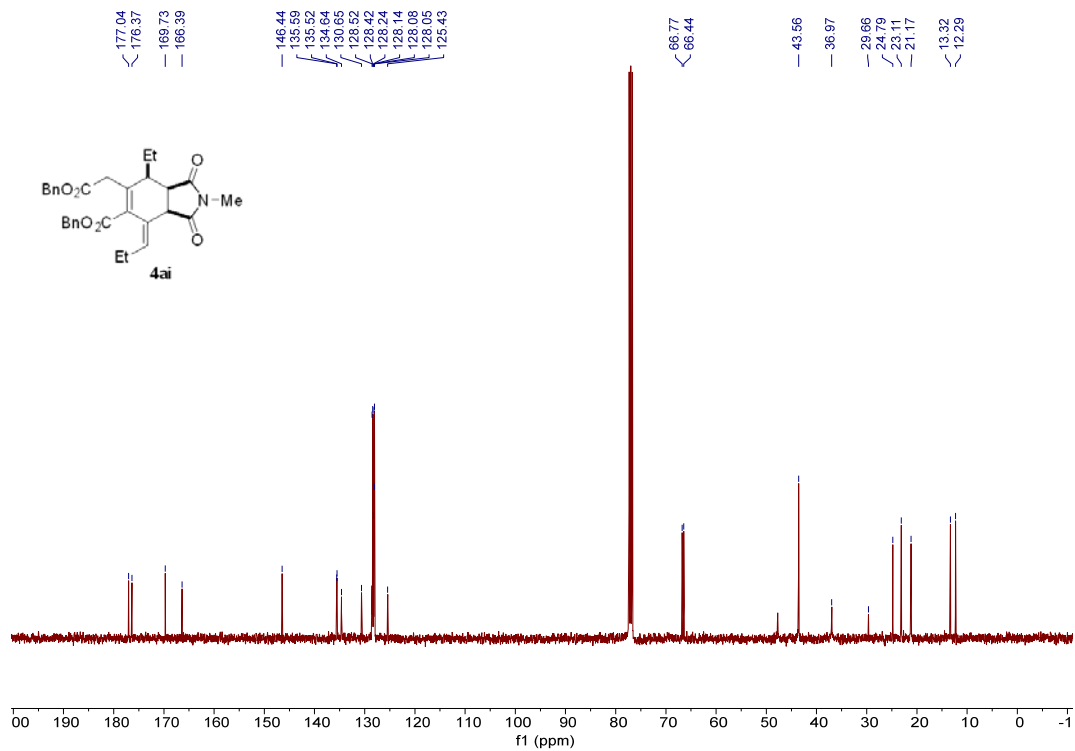

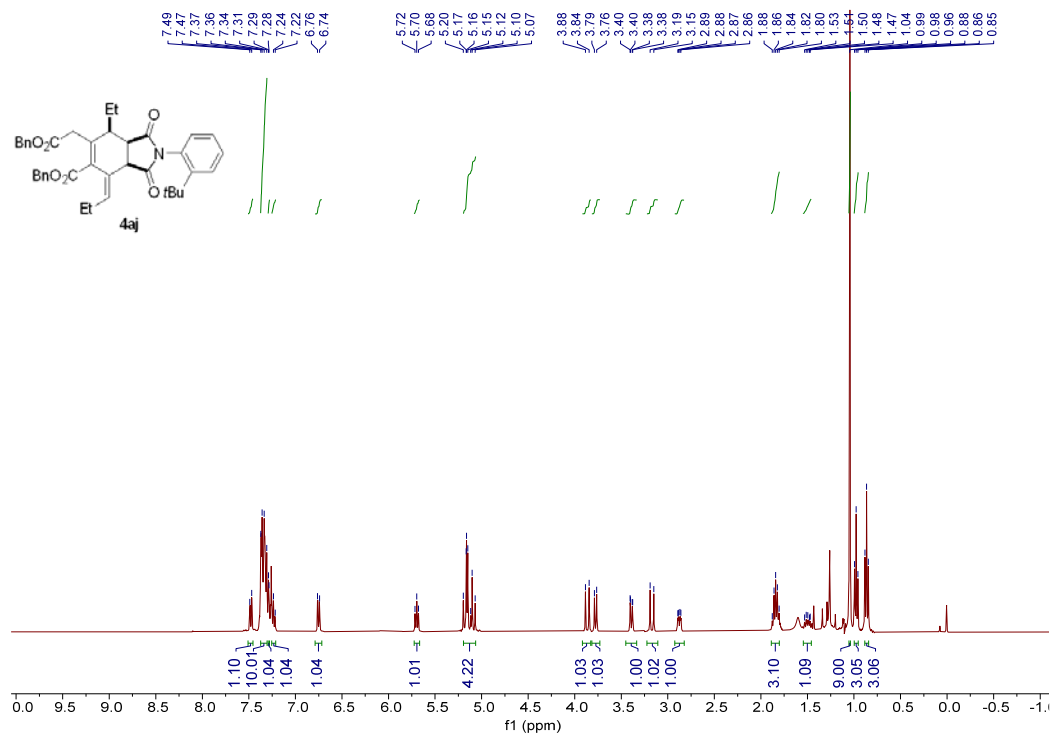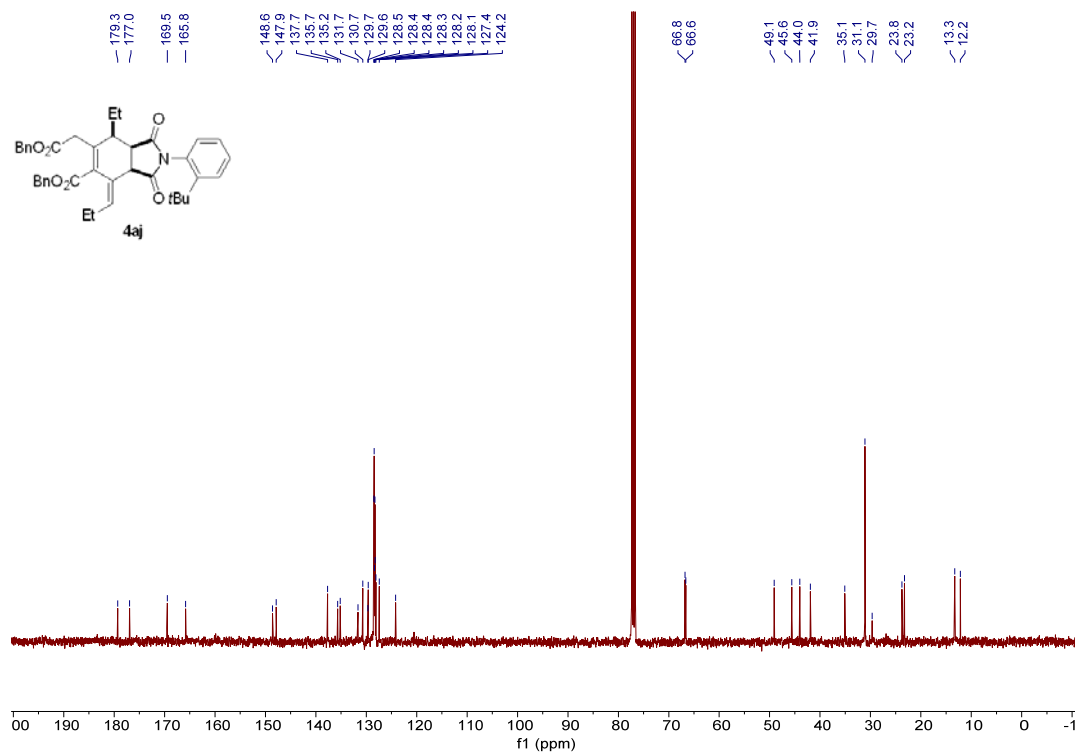

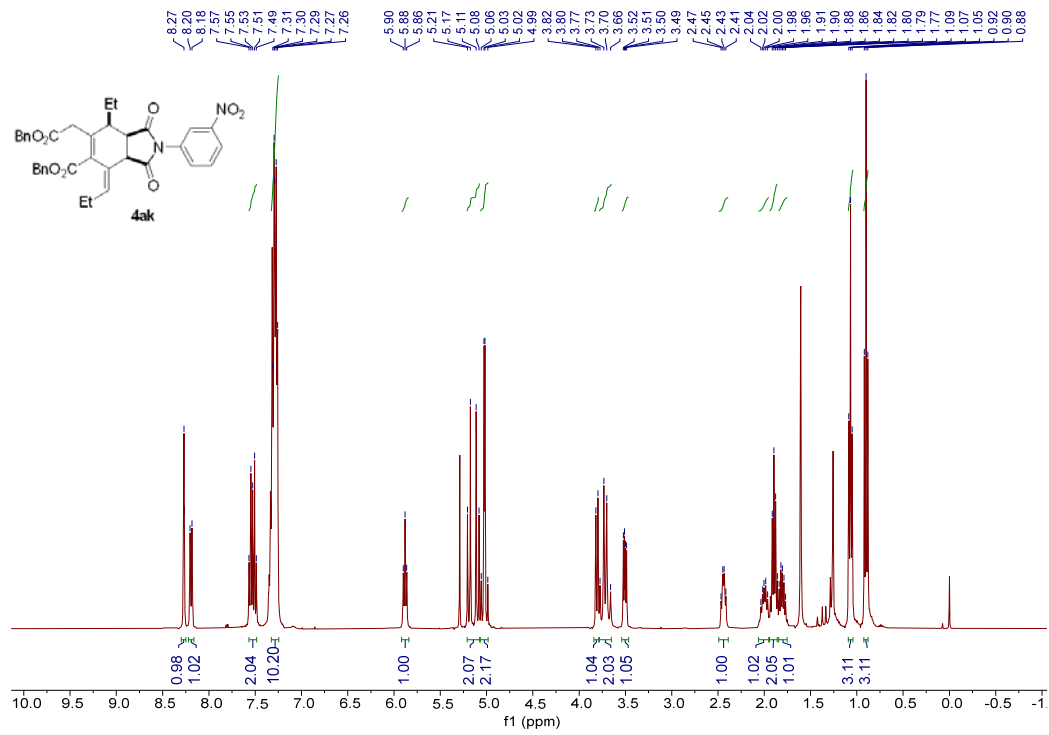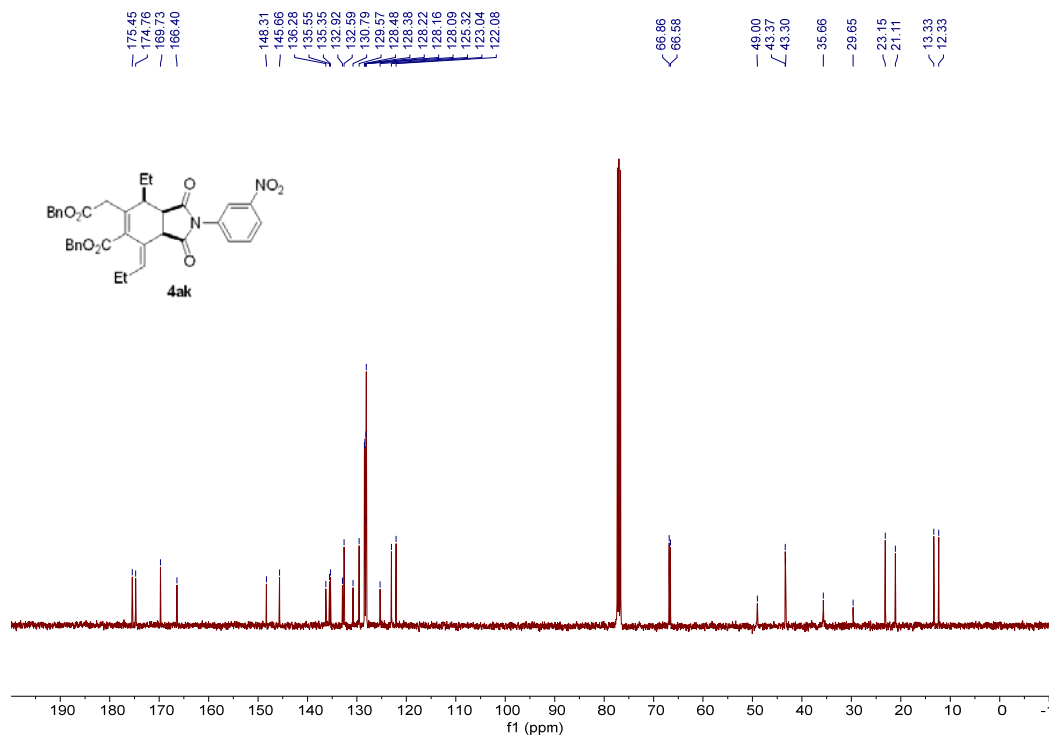

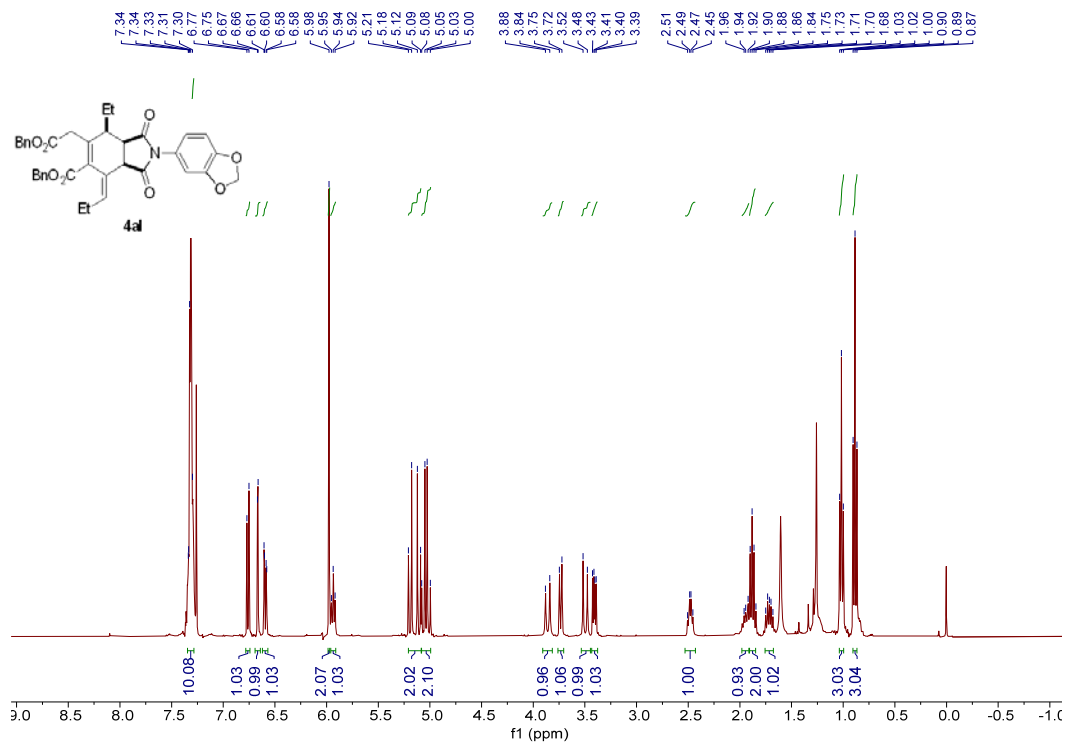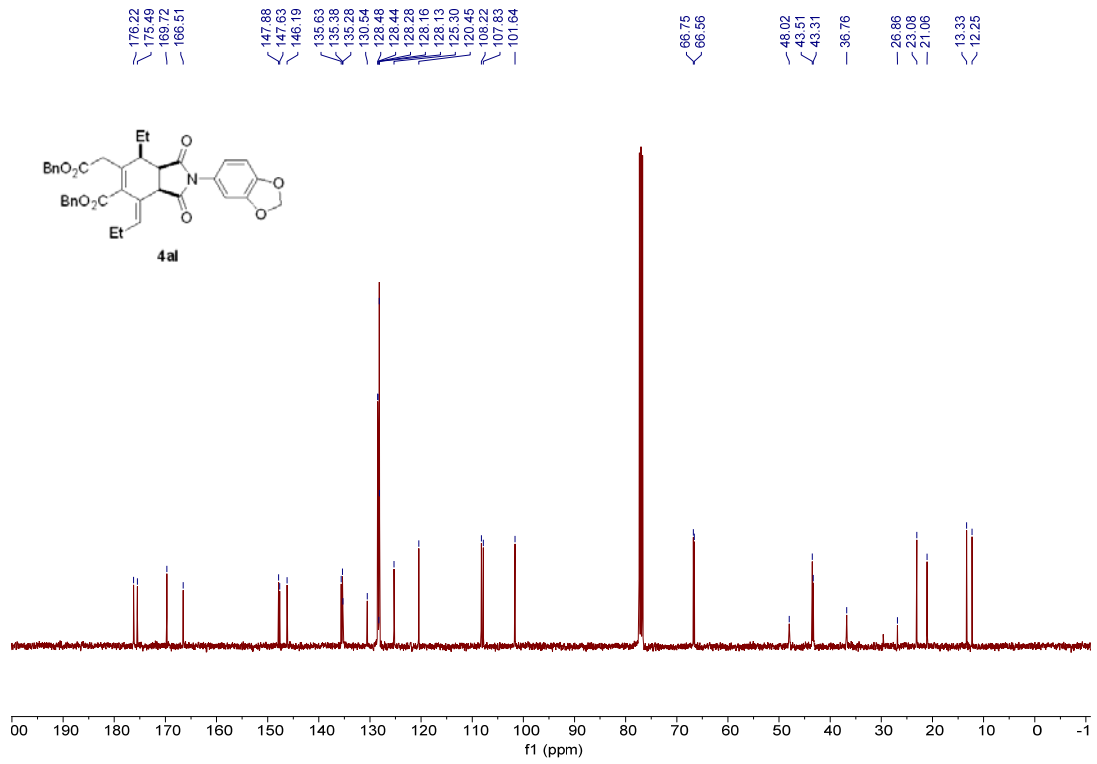



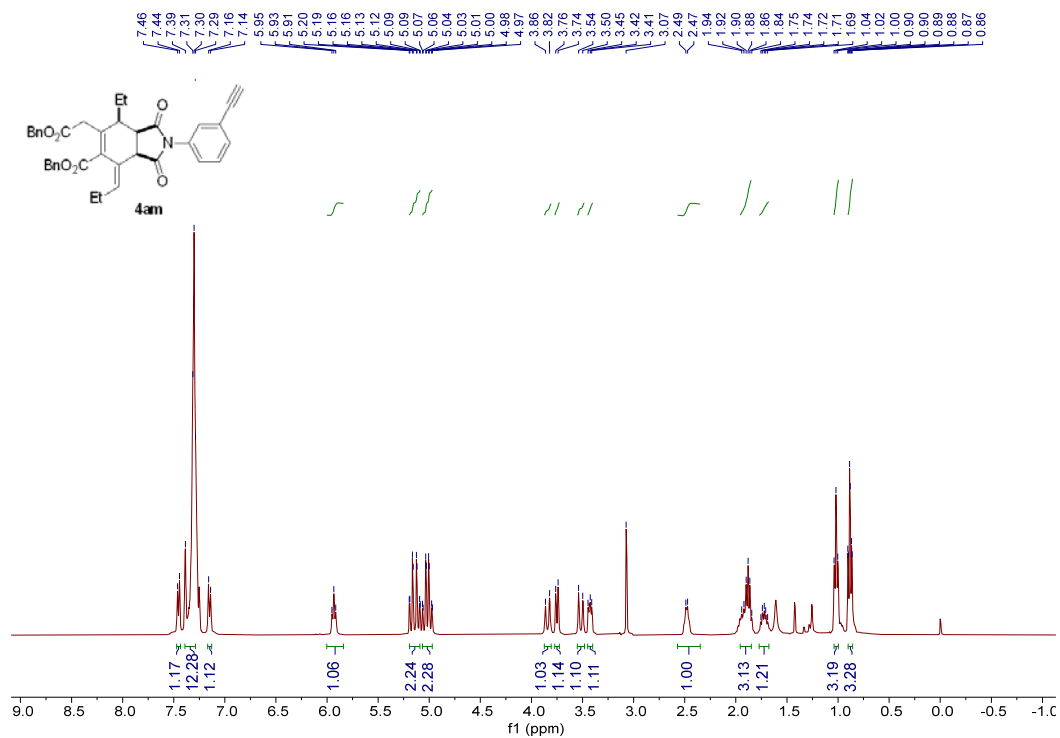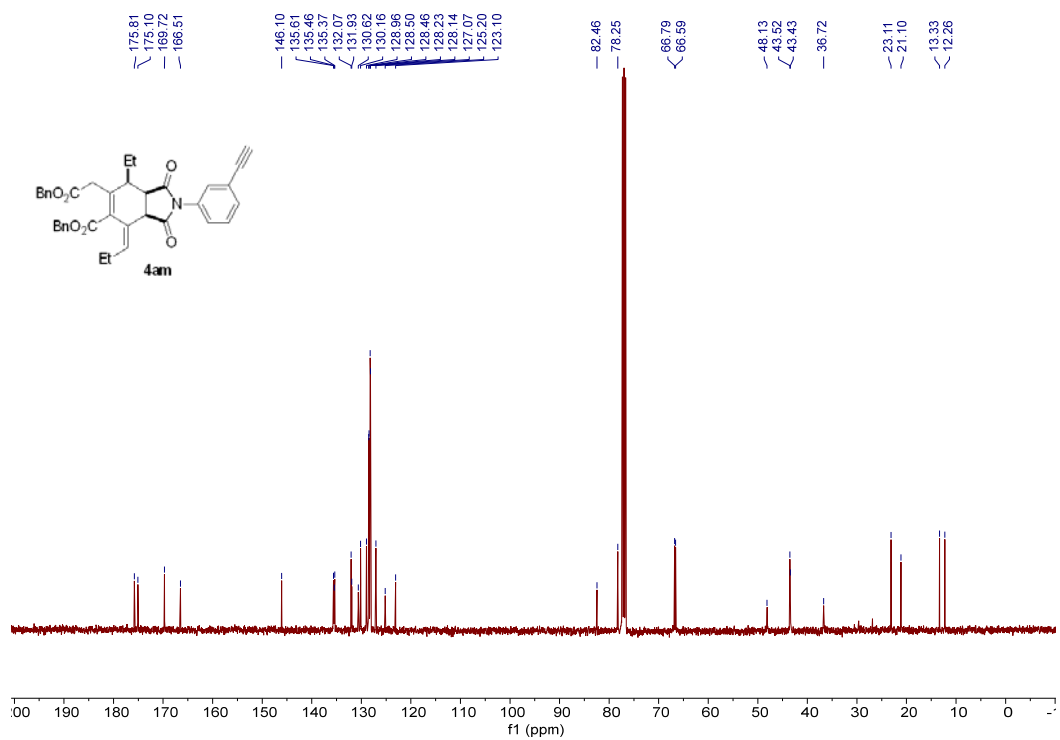



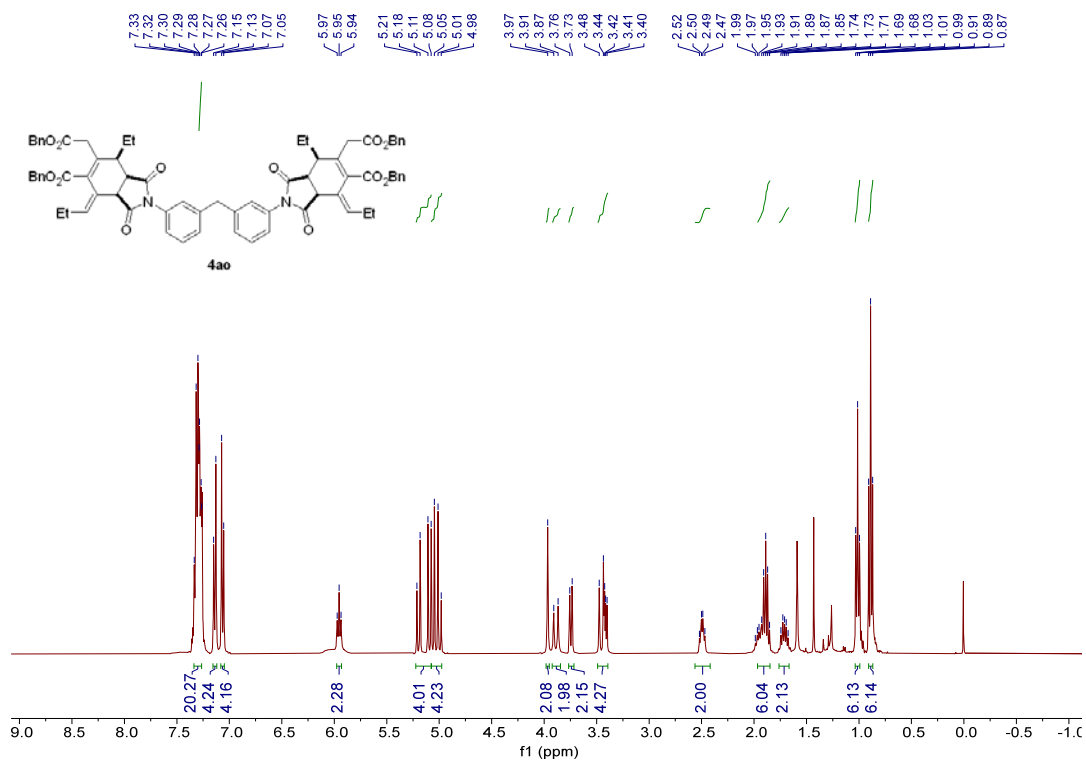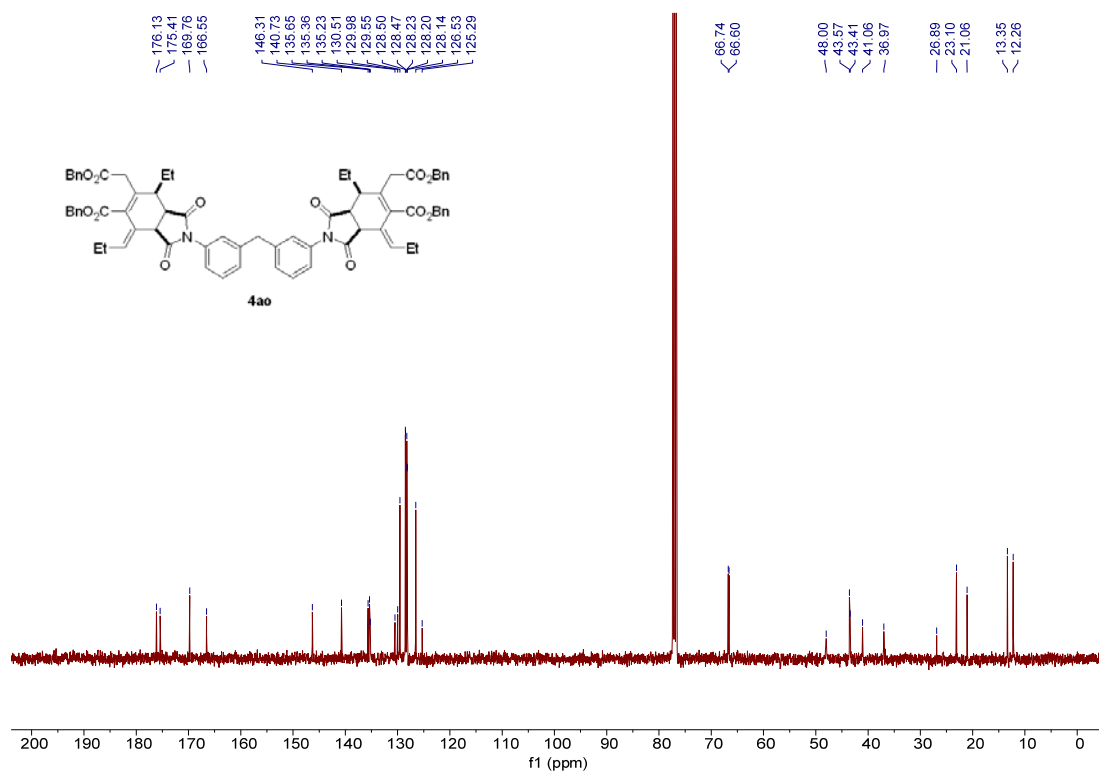

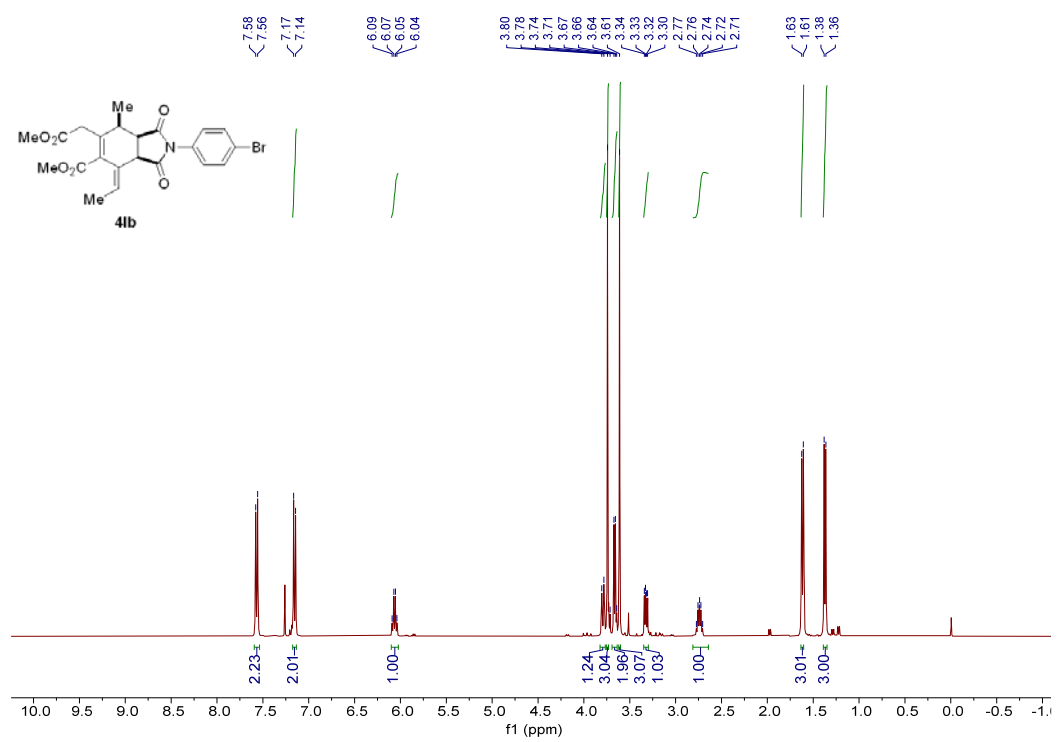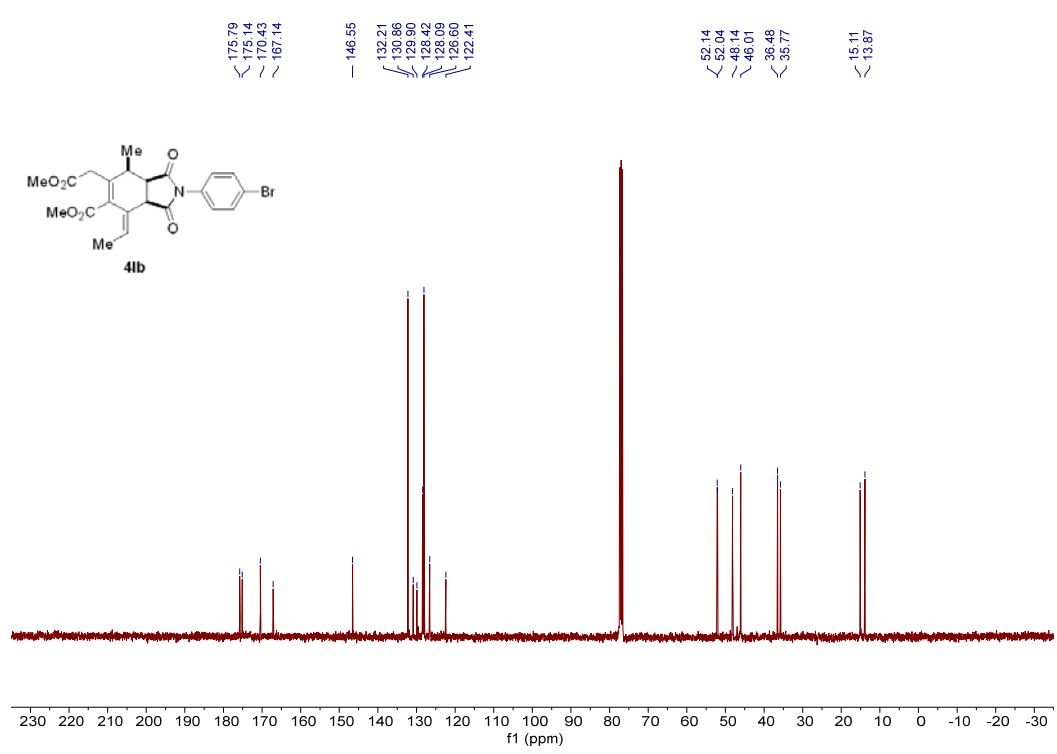

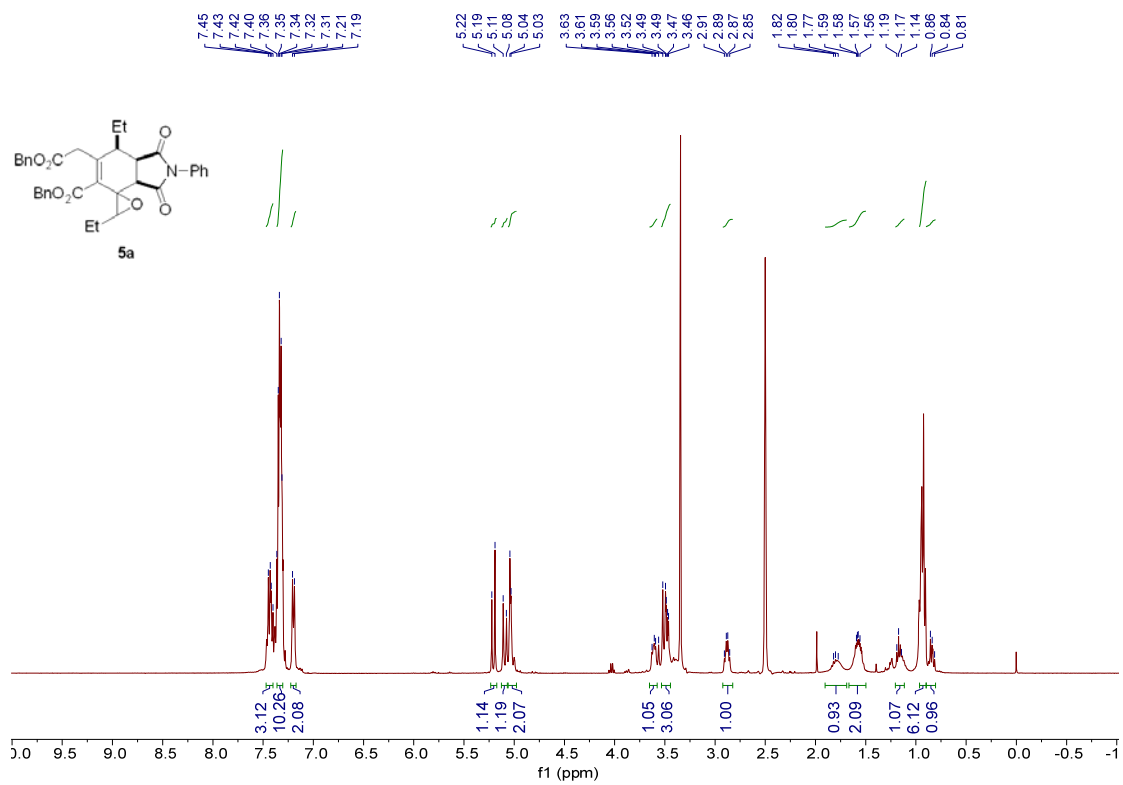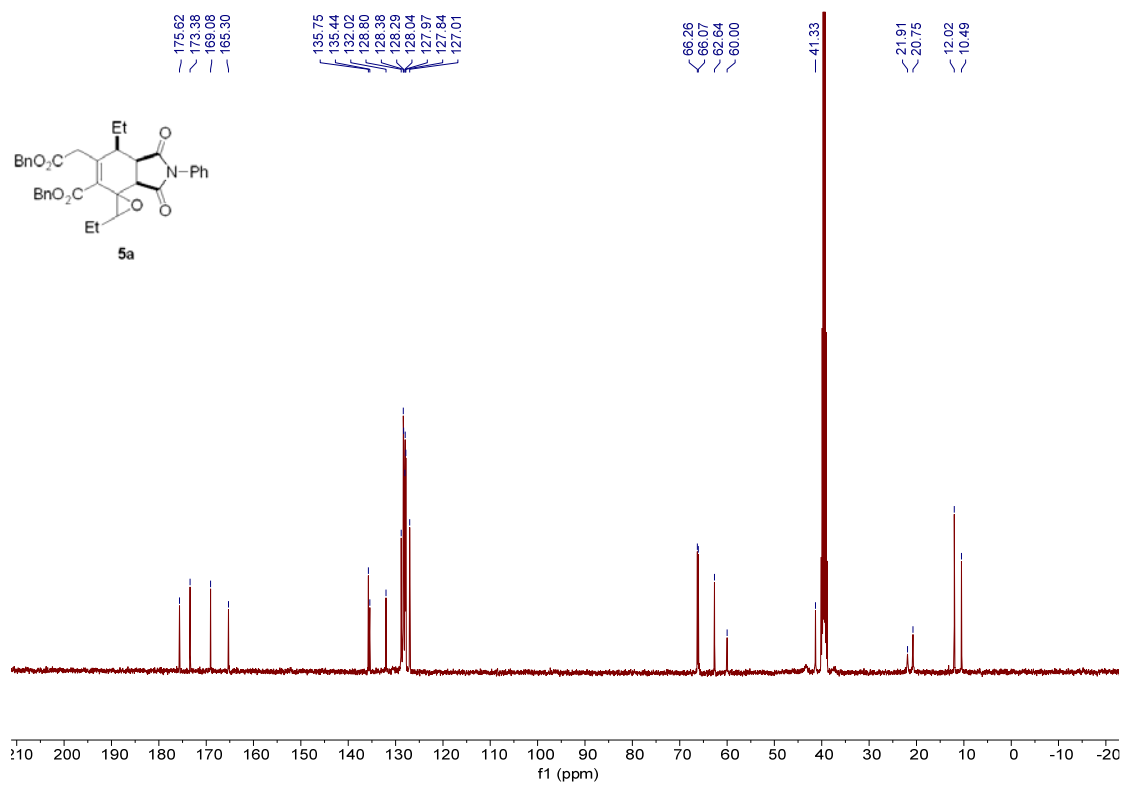

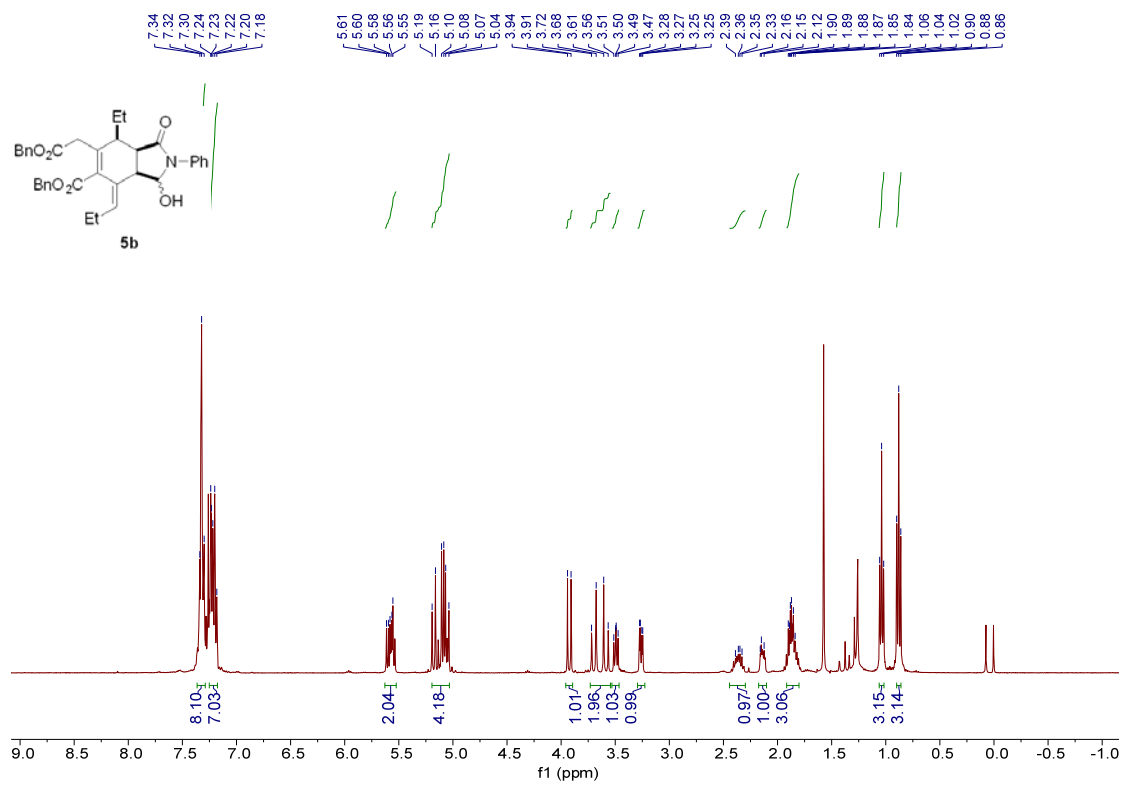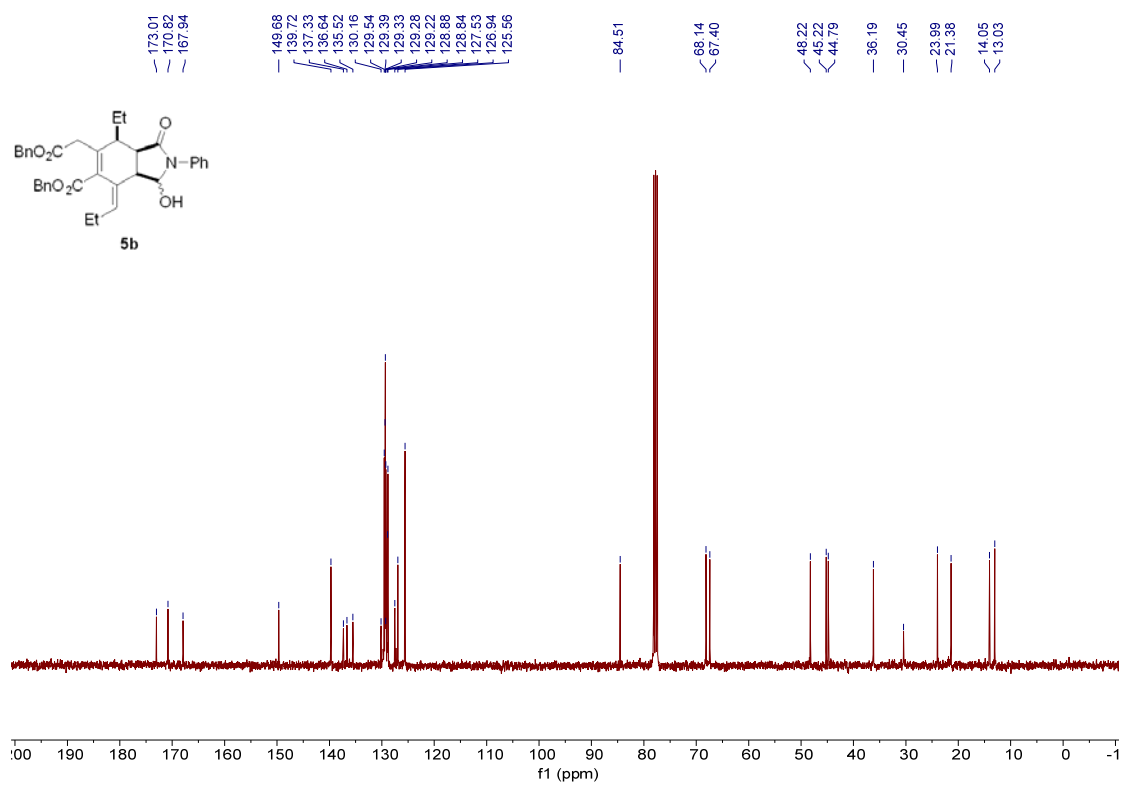

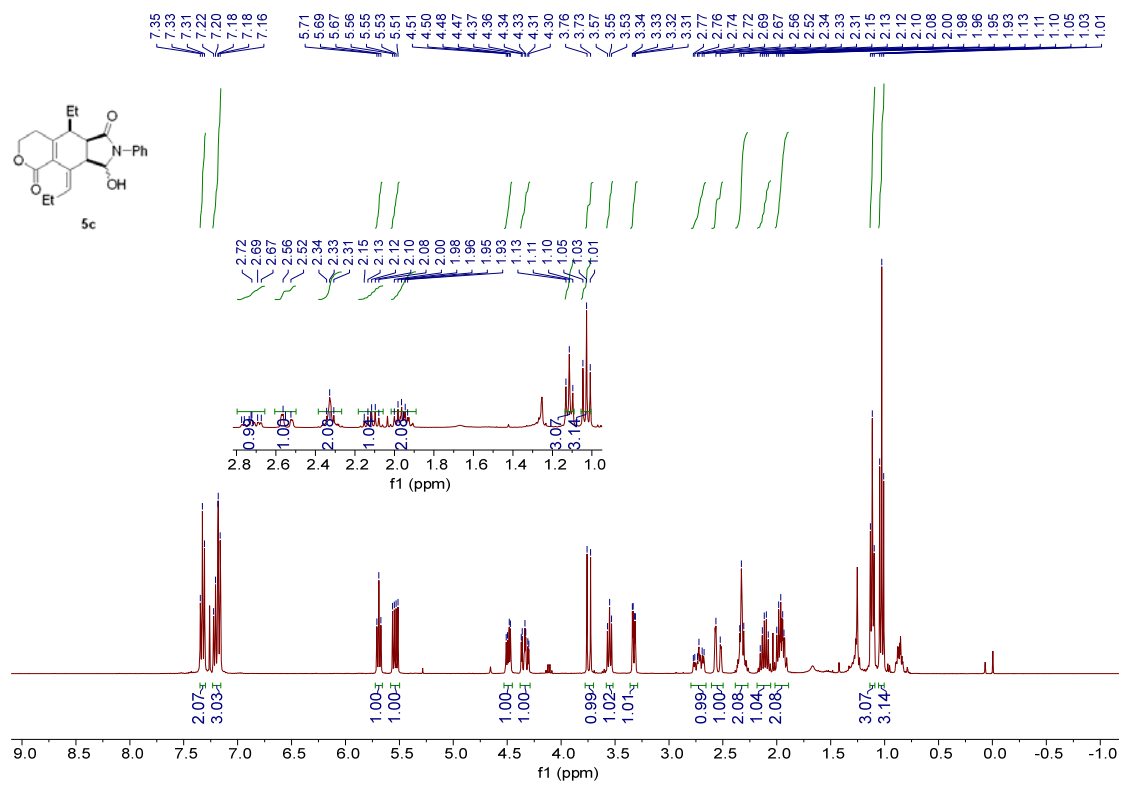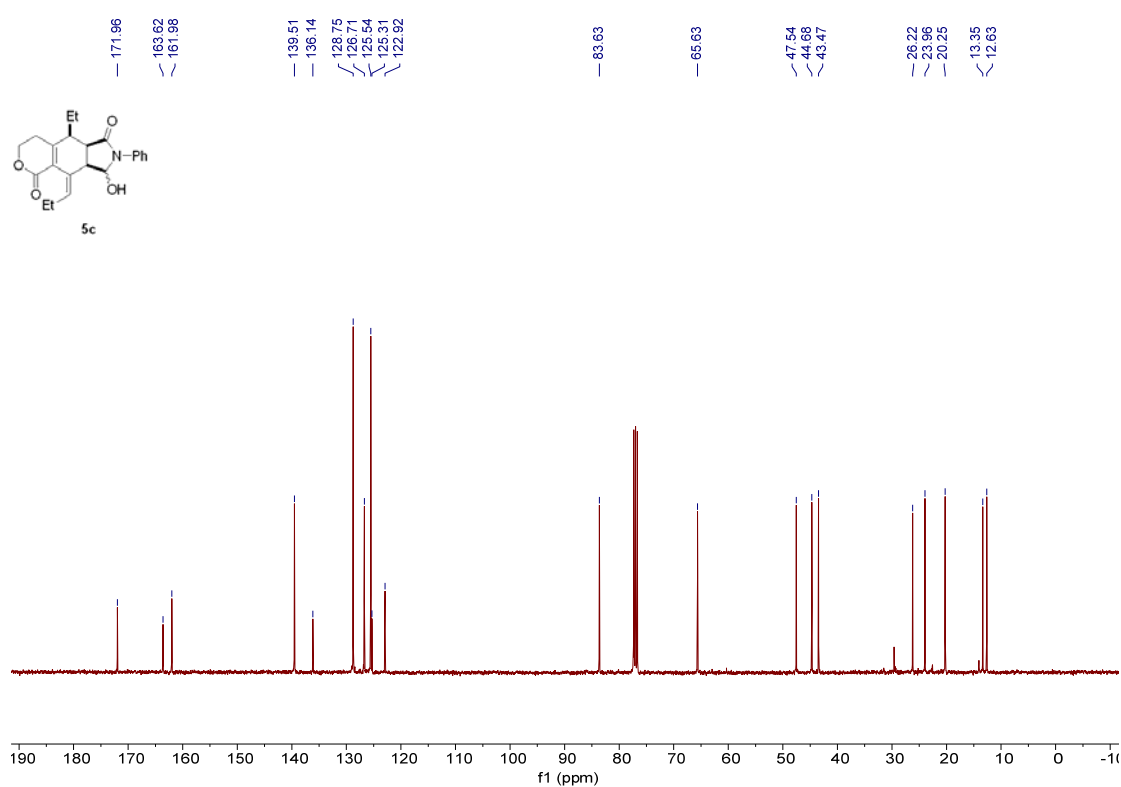

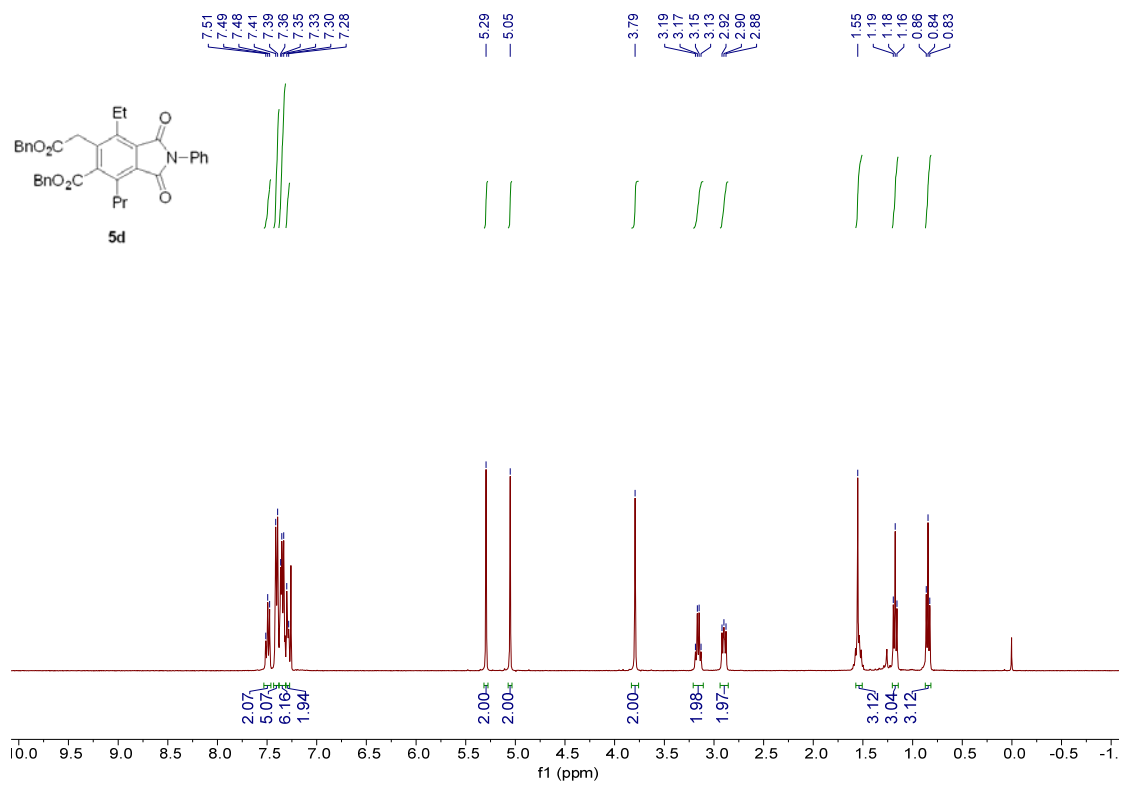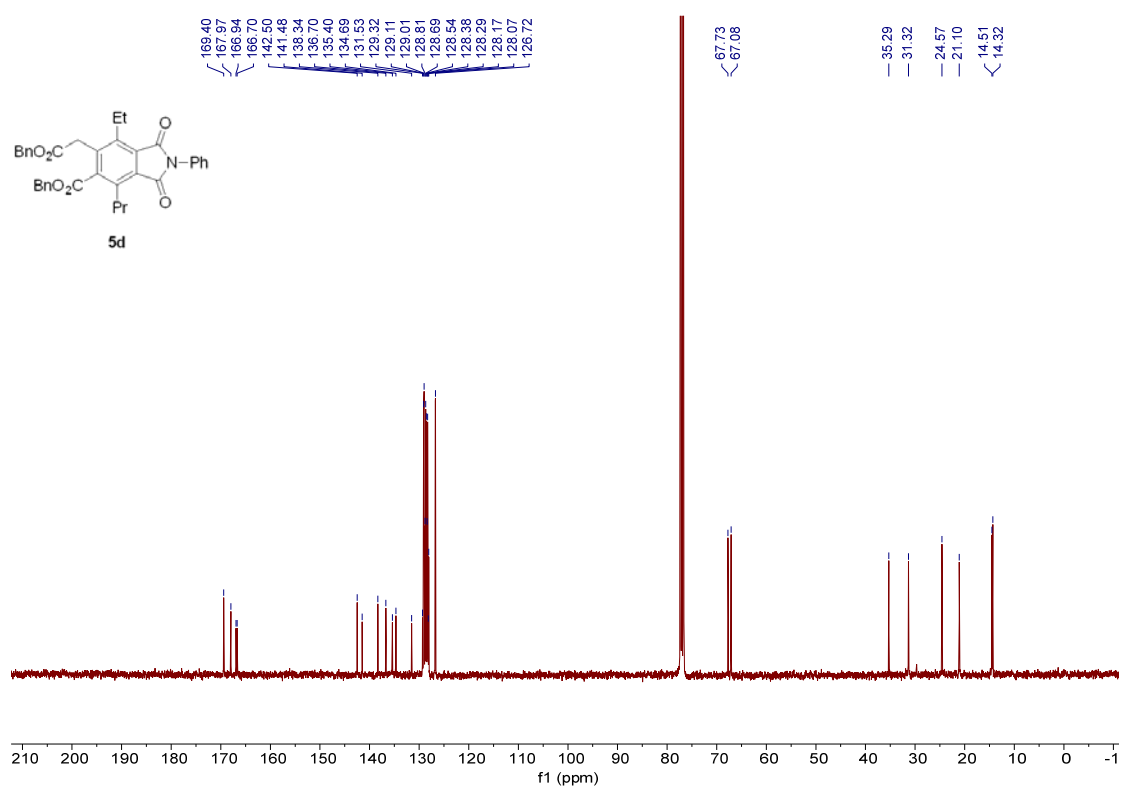



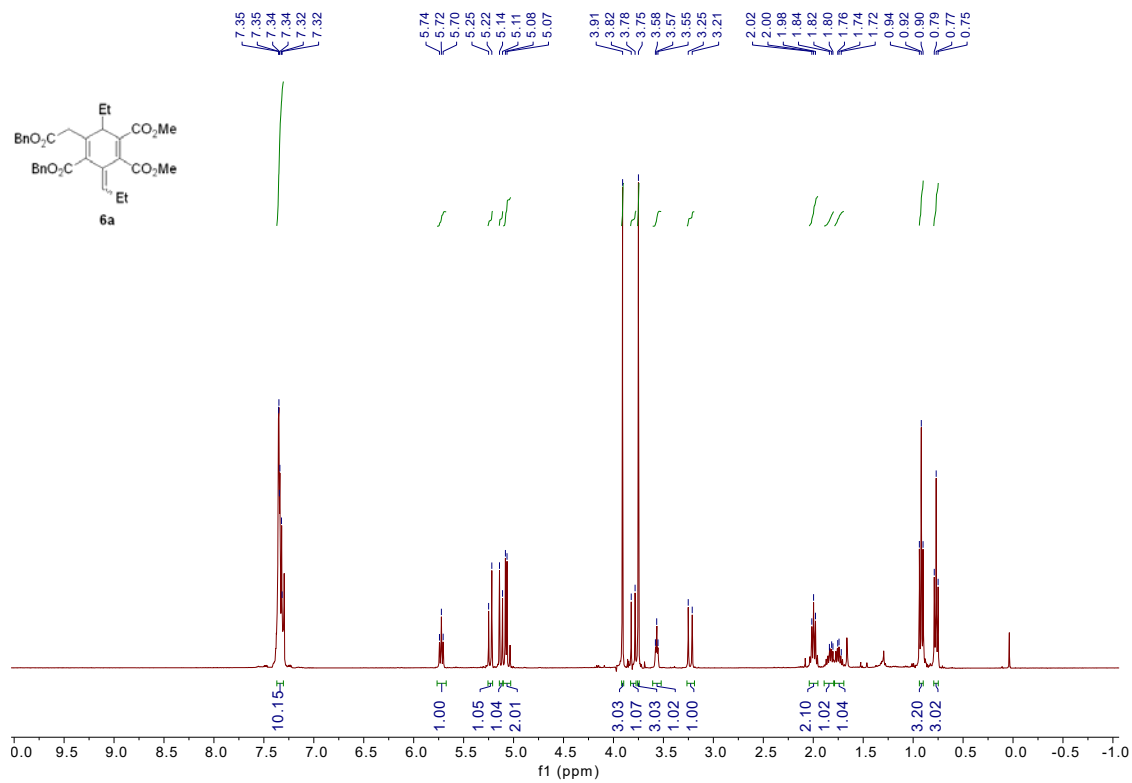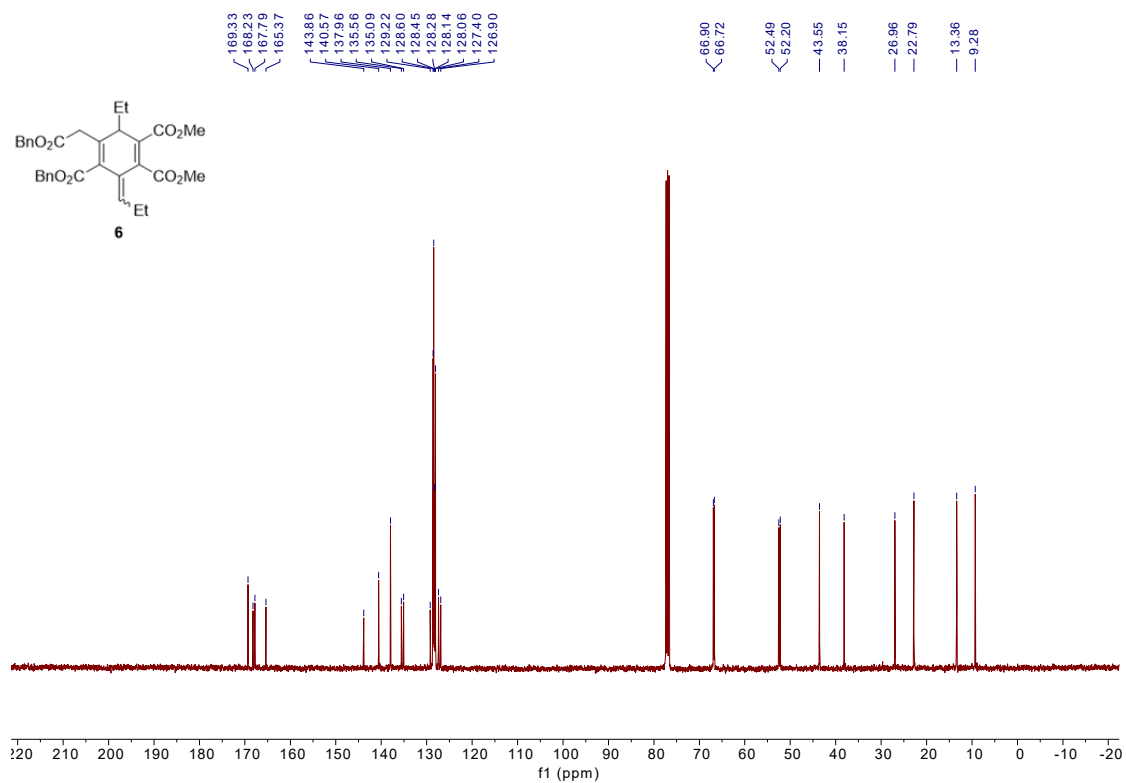

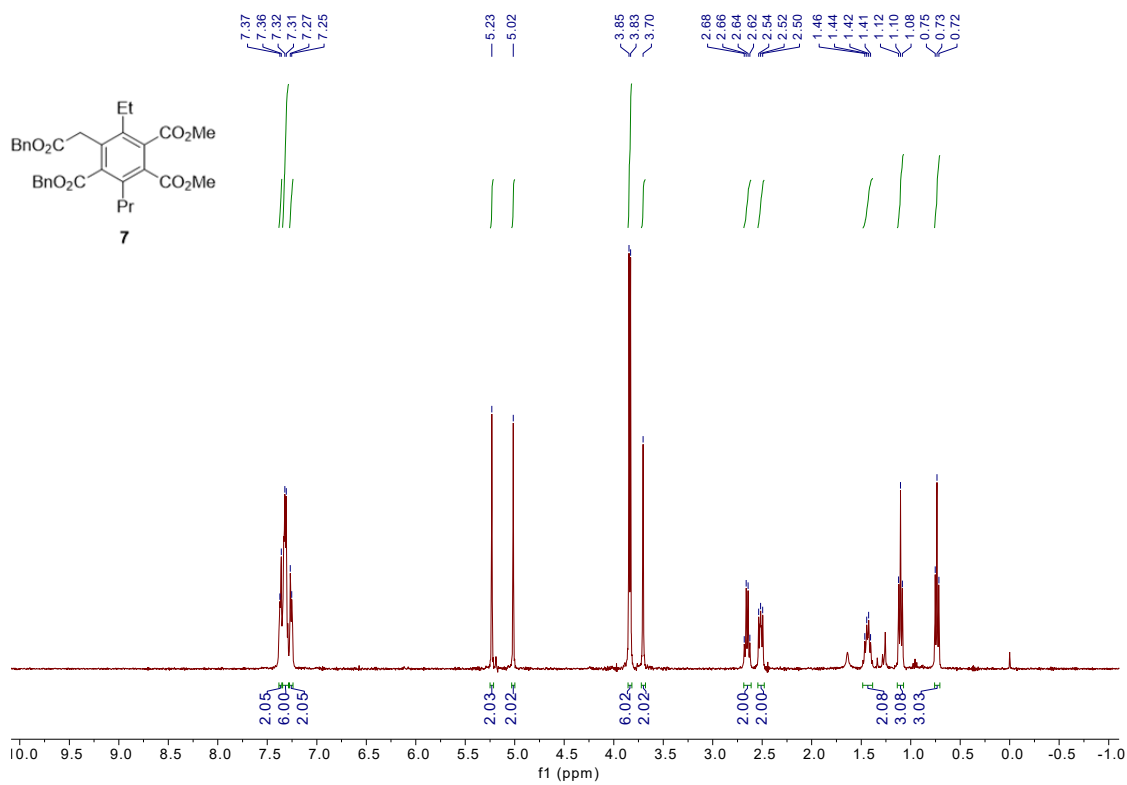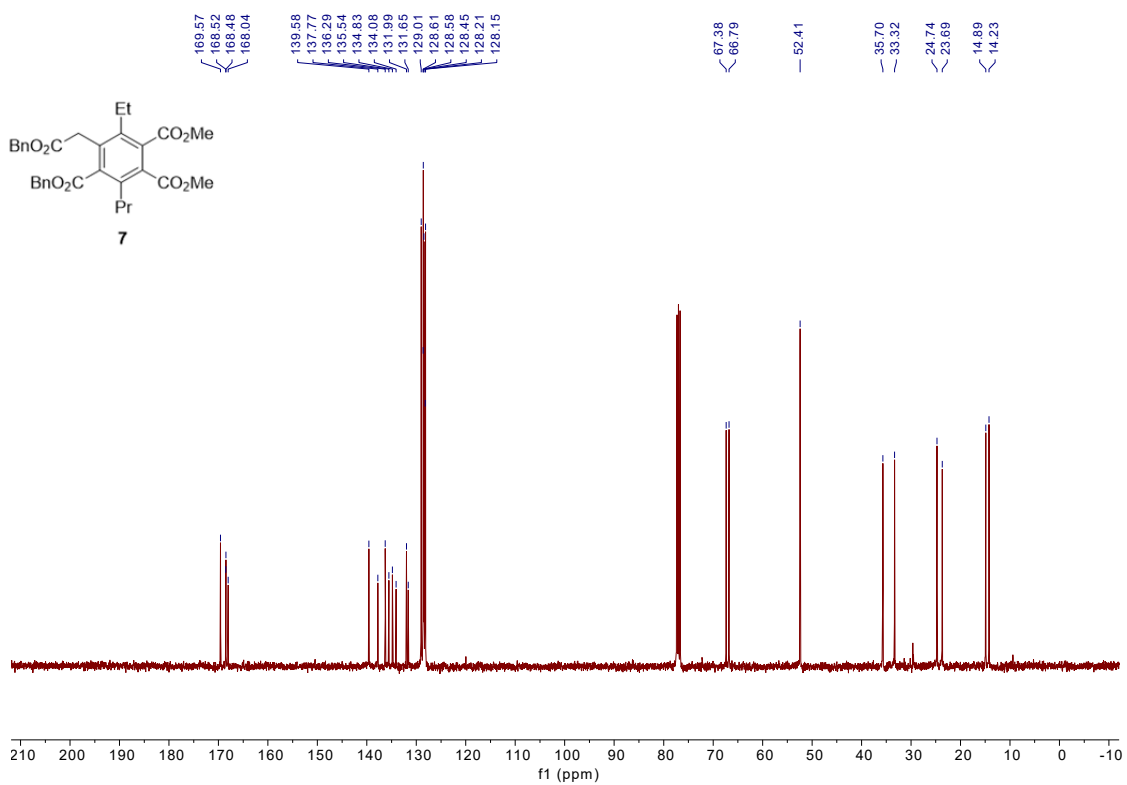

Supplement: d3cc03151a1.pdf [file d3cc03151a1.pdf]
